# Supplementary material
Source: ML conference proceedings conference paper supplement (https://proceedings.neurips.cc/paper_files/paper/2019/hash/e0e2b58d64fb37a2527329a5ce093d80-Abstract.html)
Supplement: Supplementary file [file e0e2b58d64fb37a2527329a5ce093d80-Supplemental.zip]

---

# Online-Within-Online Meta-Learning

---

Giulia Denevi<sup>1,2</sup>, Dimitris Stamos<sup>3</sup>, Carlo Ciliberto<sup>3,4</sup> and Massimiliano Pontil<sup>1,3</sup>

<sup>1</sup>Istituto Italiano di Tecnologia (Italy), <sup>2</sup>University of Genoa (Italy),

<sup>3</sup>University College of London (UK), <sup>4</sup>Imperial College of London (UK),

giulia.denevi@iit.it, c.ciliberto@imperial.ac.uk, {d.stamos.12,m.pontil}@ucl.ac.uk

## Abstract

We study the problem of learning a series of tasks in a fully online Meta-Learning setting. The goal is to exploit similarities among the tasks to incrementally adapt an inner online algorithm in order to incur a low averaged cumulative error over the tasks. We focus on a family of inner algorithms based on a parametrized variant of online Mirror Descent. The inner algorithm is incrementally adapted by an online Mirror Descent meta-algorithm using the corresponding within-task minimum regularized empirical risk as the meta-loss. In order to keep the process fully online, we approximate the meta-subgradients by the online inner algorithm. An upper bound on the approximation error allows us to derive a cumulative error bound for the proposed method. Our analysis can also be converted to the statistical setting by online-to-batch arguments. We instantiate two examples of the framework in which the meta-parameter is either a common bias vector or feature map. Finally, preliminary numerical experiments confirm our theoretical findings.

## 1 Introduction

Humans can quickly adapt knowledge gained when learning past tasks, in order to solve new tasks from just a handful of examples. In contrast, learning systems are still rather limited when it comes to transfer knowledge over a sequence of learning problems. Overcoming this limitation can have a broad impact in artificial intelligence, as it can save the expensive preparation of large training samples, often humanly annotated, needed by current machine learning methods. As a result, Meta-Learning is receiving increasing attention, both from applied [15, 32] and theoretical perspective [5, 40, 17].

Until very recently, Meta-Learning was mainly studied in the batch statistical setting, where data are assumed to be independently sampled from some distribution and they are processed in one batch, see [6, 23, 24, 25, 26, 29]. Only recently, a lot of interest raised in investigating more efficient methods, combining ideas from Online Learning and Meta-Learning, see [1, 12, 13, 30, 3, 21, 16, 8, 11, 30]. In this setting, which is sometimes referred to as *Lifelong Learning*, the tasks are observed sequentially – via corresponding sets of training examples – and the broad goal is to exploit similarities across the tasks to incrementally adapt an inner (within-task) algorithm to such a sequence. There are different ways to deal with Meta-Learning in an online framework: the so-called *Online-Within-Batch* (OWB) framework, where the tasks are processed online but the data within each task are processed in one batch, see [1, 12, 13, 16, 8, 3, 21], or the so-called *Online-Within-Online* (OWO) framework, where data are processed sequentially both within and across the tasks, see [1, 3, 21, 16, 11]. Previous work mainly analyzed specific settings, see the technical discussion in App. A. The main goal of this work is to propose an OWO Meta-Learning approach that can be adapted to a broad family of algorithms.

We consider a general class of inner algorithms based on primal-dual Online Learning [37, 33, 38, 36, 35]. In particular, we discuss in detail the case of online Mirror Descent on a regularized variant of the empirical risk. The regularizer belongs to a general family of strongly convex functions parametrized by a meta-parameter. The inner algorithm is adapted by a meta-algorithm, which also consists in applying online Mirror Descent on a meta-objective given by the within-task minimum regularized

empirical risk. The interplay between the meta-algorithm and the inner algorithm plays a key role in our analysis. The latter is used to compute a good approximation of the meta-subgradient which is supplied to the former. A key novelty of our analysis is to show that, exploiting a closed form expression of the error on the meta-subgradients, we can automatically derive a cumulative error bound for the entire procedure. Our analysis holds also for more aggressive primal-dual online updates and it can be adapted to the statistical setting by online-to-batch arguments.

**Contributions.** Our contribution is threefold. First, we derive an efficient and theoretically grounded OWO Meta-Learning framework which is inspired by Multi-Task Learning (MTL). Our framework applies to a wide class of within-task algorithms and tasks’ relationships. Second, we establish how our analysis can be converted to the statistical setting. Finally, we show how our general analysis can be directly applied to two important families of inner algorithms in which the meta-parameter is either a bias vector or a feature map shared across the tasks.

**Paper organization.** We start by introducing in [Sec. 2](#) our OWO Meta-Learning setting. In [Sec. 3](#) we recall some background material from primal-dual Online Learning. In [Sec. 4](#) we outline the proposed method and we give a cumulative error bound for it. In [Sec. 5](#) we show how the above analysis can be used to derive guarantees for our method in the statistical setting. In [Sec. 6](#) we specify our framework to two important examples in which the tasks share a common bias vector or feature map. Finally, in [Sec. 7](#) we report preliminary experiments with our method and in [Sec. 8](#) we draw conclusions. Technical proofs are postponed to the appendix.

## 2 Setting

In this section we introduce the OWO Meta-Learning problem. We consider that the learner is facing a sequence of online tasks. Corresponding to each task, there is an input space  $\mathcal{X}$ , an output space  $\mathcal{Y}$  and a dataset  $Z = (z_i)_{i=1}^n = (x_i, y_i)_{i=1}^n \in (\mathcal{X} \times \mathcal{Y})^n$ , which is observed *sequentially*. Online Learning aims to design an algorithm that makes predictions through time from past information. More precisely, at each step  $i \in \{1, \dots, n\}$ : (a) a datapoint  $z_i = (x_i, y_i)$  is observed, (b) the algorithm outputs a label  $\hat{y}_i$ , (c) the learner incurs the error  $\ell_i(\hat{y}_i)$ , where  $\ell_i(\cdot) = \ell(\cdot, y_i)$  for a loss function  $\ell$ . To simplify our presentation, throughout we let  $\mathcal{X} \subseteq \mathbb{R}^d$ ,  $\mathcal{Y} \subseteq \mathbb{R}$  and we consider algorithms that perform linear predictions of the form  $\hat{y}_i = \langle x_i, w_i \rangle$ , where  $(w_i)_{i=1}^n$  is a sequence of weight vectors updated by the algorithm and  $\langle \cdot, \cdot \rangle$  denotes the standard inner product in  $\mathbb{R}^d$ . The goal is to bound the cumulative error of the algorithm, i.e.  $\mathcal{E}_{\text{inner}}(Z) = \sum_{i=1}^n \ell_i(\langle x_i, w_i \rangle)$ , with respect to (w.r.t.) the same quantity incurred by a vector  $\hat{w} \in \mathbb{R}^d$  fixed in hindsight, i.e.  $\sum_{i=1}^n \ell_i(\langle x_i, \hat{w} \rangle)$ .

In the OWO Meta-Learning setting, we have a family of inner online algorithms identified by a meta-parameter  $\theta$  belonging to a prescribed set  $\Theta$  and the goal is to adapt  $\theta$  to a sequence of learning tasks, in online fashion. Throughout this work,  $\Theta$  will be a closed, convex, non-empty subset of an Euclidean space  $\mathcal{M}$ . The broad goal is to “transfer information” gained when learning previous tasks, in order to help learning future tasks. For this purpose, we propose a Meta-Learning procedure, acting across the tasks, which modifies the inner algorithm one task after another. More precisely, we let  $T$  be the number of tasks and, for each task  $t \in \{1, \dots, T\}$  we let  $Z_t = (x_{t,i}, y_{t,i})_{i=1}^n$ <sup>1</sup> be the corresponding data sequence. At each time  $t$ : (a) the meta-learner incrementally receives a task dataset  $Z_t$ , (b) it runs the inner online algorithm with meta-parameter  $\theta_t$  on  $Z_t$ , returning the predictor vectors  $(w_{\theta_t,i})_{i=1}^n$ , (c) it incrementally incurs the errors  $\ell_{t,i}(\langle x_{t,i}, w_{\theta_t,i} \rangle)$ , where  $\ell_{t,i}(\cdot) = \ell(\cdot, y_{t,i})$ , (d) the meta-parameter (and consequently, the inner algorithm) is updated in  $\theta_{t+1}$ . Denoting by  $\mathcal{E}_{\text{inner}}(Z_t, \theta_t)$  the cumulative error of the inner algorithm with meta-parameter  $\theta_t$  on the dataset  $Z_t$ , the goal is to bound the error accumulated across the tasks, i.e.

$$\mathcal{E}_{\text{meta}}((Z_t)_{t=1}^T) = \sum_{t=1}^T \mathcal{E}_{\text{inner}}(Z_t, \theta_t) = \sum_{t=1}^T \sum_{i=1}^n \ell_{t,i}(\langle x_{t,i}, w_{\theta_t,i} \rangle), \quad (1)$$

w.r.t. the same quantity incurred by a sequence of tasks’ vectors  $(\hat{w}_t)_{t=1}^T$  fixed in hindsight, i.e.  $\sum_{t=1}^T \sum_{i=1}^n \ell_{t,i}(\langle x_{t,i}, \hat{w}_t \rangle)$ .

The setting we consider in the paper is inspired by previous work on Multi-Task Learning, such as [\[2, 10, 18\]](#). To describe it, we use extended real-valued functions and, for any data sequence  $Z$  and

<sup>1</sup>Throughout the paper we use the double subscript notation “ $_{t,i}$ ”, to denote the {outer, inner} task index.

meta-parameter  $\theta \in \Theta$ , we define the within-task minimum regularized empirical risk

$$\mathcal{L}_Z(\theta) = \min_{w \in \mathbb{R}^d} \mathcal{R}_Z(w) + \lambda f(w, \theta) \quad \mathcal{R}_Z(w) = \frac{1}{n} \sum_{i=1}^n \ell_i(\langle x_i, w \rangle), \quad (2)$$

where  $\lambda > 0$  is a regularization parameter and  $f$  is an appropriate complexity term ensuring the existence and the uniqueness of the above minimizer  $\hat{w}_\theta$ . Assuming the entire sequence  $(Z_t)_{t=1}^T$  available in hindsight, introducing the notation  $\mathcal{L}_t = \mathcal{L}_{Z_t}$ , many MTL methods read as follows

$$\min_{\theta \in \mathcal{M}} \sum_{t=1}^T \mathcal{L}_t(\theta) + \eta F(\theta), \quad (3)$$

where  $\eta > 0$  is a meta-regularization parameter and  $F$  is an appropriate meta-regularizer ensuring that the above minimum is attained. We stress that in our OWO Meta-Learning setting, the data are received sequentially, both within and across the tasks. The above formulation inspires us to take a within-task online algorithm that mimics well the (batch) objective in [Eq. \(2\)](#) and to define as meta-objectives for the online meta-algorithm the functions  $(\mathcal{L}_t)_{t=1}^T$ . Obviously, in this setting, the meta-objectives (and consequently their subgradients used by the meta-algorithm) are computed only up to an approximation error, depending on the specific properties of the inner algorithm we are using. We will show how to control and exploit this approximation error in the analysis.

In the sequel, for an Euclidean space  $\mathcal{V}$ , we let  $\Gamma_0(\mathcal{V})$  to be the set of proper, closed and convex functions over  $\mathcal{V}$  and, for any  $f \in \Gamma_0(\mathcal{V})$ , we denote by  $\text{Dom} f$  its domain (we refer to [App. B](#) and [\[31\]](#) for notions on convex analysis). In this work, we make the following standard assumptions in which we introduce two norms  $\|\cdot\|_\theta$  and  $\|\cdot\|$  that will be specified in two applications below.

**Assumption 1** (Loss and regularizer). *Let  $\ell(\cdot, y)$  be a convex and closed real-valued function for any  $y \in \mathcal{Y}$  and let  $f \in \Gamma_0(\mathbb{R}^d \times \mathcal{M})$  be such that, for any  $\theta \in \Theta$ ,  $f(\cdot, \theta)$  is 1-strongly convex w.r.t. a norm  $\|\cdot\|_\theta$  over  $\mathbb{R}^d$ ,  $\inf_{w \in \mathbb{R}^d} f(w, \theta) = 0$  and, for any  $\theta \notin \Theta$ ,  $\text{Dom} f(\cdot, \theta) = \emptyset$ .*

**Assumption 2** (Meta-regularizer). *Let  $F$  be a closed and 1-strongly convex function w.r.t. a norm  $\|\cdot\|$  over  $\mathcal{M}$  such that  $\inf_{\theta \in \mathcal{M}} F(\theta) = 0$  and  $\text{Dom} F = \Theta$ .*

Notice that the norm w.r.t. which the function  $f(\cdot, \theta)$  is assumed to be strongly convex may vary with  $\theta$ . Moreover, under [Asm. 1](#),  $\text{Dom} \mathcal{L}_Z = \Theta$  and, since  $\mathcal{L}_Z$  is defined as the partial minimum of a function in  $\Gamma_0(\mathbb{R}^d \times \mathcal{M})$ ,  $\mathcal{L}_Z \in \Gamma_0(\mathcal{M})$ . This property supports the choice of this function as the meta-objective for our meta-algorithm. Finally, by [Lemma 29](#) in [App. B](#), [Asm. 1](#) and [Asm. 2](#) ensure the existence and the uniqueness of the minimizers in [Eq. \(2\)](#) and [Eq. \(3\)](#).

We conclude this section by giving two examples included in the framework above. The first one is inspired by the MTL variance regularizer in [\[14\]](#), while the second example, which can be easily extended to more general MTL regularizers such as in [\[2, 10, 27, 28\]](#), relates to the MTL trace norm regularizer. As we will see in the following, in the first example the tasks' predictors are encouraged to stay close to a common bias vector, in the second example they are encouraged to lie in the range of a low-rank feature map. In order to describe these examples we require some additional notation. We let  $\|\cdot\|_2$ ,  $\|\cdot\|_F$ ,  $\|\cdot\|_{\text{Tr}}$ ,  $\|\cdot\|_\infty$ , be the Euclidean, Frobenius, trace, and operator norm, respectively. We also let " $\cdot^\dagger$ " be the pseudo-inverse,  $\text{Tr}(\cdot)$  be the trace,  $\text{Ran}(\cdot)$  be the range and  $\mathbb{S}^d$  (resp.  $\mathbb{S}_+^d$ ) be the set of symmetric (resp. positive semi-definite) matrices in  $\mathbb{R}^{d \times d}$ . Finally,  $\iota_S$  denotes the indicator function of the set  $S$ , taking value 0 when the argument belongs to  $S$  and  $+\infty$  otherwise.

**Example 1** (Bias). *We choose  $\mathcal{M} = \Theta = \mathbb{R}^d$ ,  $F(\cdot) = \frac{1}{2} \|\cdot\|_2^2$ , satisfying [Asm. 2](#) with  $\|\cdot\| = \|\cdot\|_2$ , and  $f(\cdot, \theta) = \frac{1}{2} \|\cdot - \theta\|_2^2$ , satisfying [Asm. 1](#) with  $\|\cdot\|_\theta = \|\cdot\|_2$  for every  $\theta \in \mathbb{R}^d$ .*

**Example 2** (Feature Map). *We choose  $\mathcal{M} = \mathbb{S}^d$  and  $\Theta = \mathcal{S}$ , where  $\mathcal{S} = \{\theta \in \mathbb{S}_+^d : \text{Tr}(\theta) \leq 1\}$ . For a fixed  $\theta_0 \in \mathcal{S}$ , we set  $F(\cdot) = \frac{1}{2} \|\cdot - \theta_0\|_F^2 + \iota_{\mathcal{S}}(\cdot)$ , satisfying [Asm. 2](#) with  $\|\cdot\| = \|\cdot\|_F$ , and  $f(\cdot, \theta) = \frac{1}{2} \langle \cdot, \theta^\dagger \cdot \rangle + \iota_{\text{Ran}(\theta)}(\cdot) + \iota_{\mathcal{S}}(\theta)$ , satisfying [Asm. 1](#) with  $\|\cdot\|_\theta = \sqrt{\langle \cdot, \theta^\dagger \cdot \rangle}$  for any  $\theta \in \mathcal{S}$ .*

We will return to these examples in [Sec. 6](#), specializing our method and our analysis to these settings.

### 3 Preliminaries: primal-dual Online Learning

Our OWO Meta-Learning method consists in the application of two nested primal-dual online algorithms, one operating within the tasks and another across the tasks. In particular, even though our

---

**Algorithm 1** Primal-dual online algorithm – online Mirror Descent

---

**Input**  $(g_m)_{m=1}^M, (A_m)_{m=1}^M, (c_m)_{m=1}^M, (\epsilon_m)_{m=1}^M, r$  as described in the text

**Initialization**  $\alpha_1 = (), v_1 = \nabla r^*(0) \in \text{Dom } r$

**For**  $m = 1$  to  $M$

    Receive  $g_m, A_m, c_{m+1}, \epsilon_m$

    Suffer  $g_m(A_m v_m)$  and compute  $\alpha'_m \in \partial_{\epsilon_m} g_m(A_m v_m)$

    Update  $\alpha_{m+1} = (\alpha_m, \alpha'_m)$

    Define  $v_{m+1} = \nabla r^*\left(-1/c_{m+1} \sum_{j=1}^m A_j^* \alpha_{m+1,j}\right) \in \text{Dom } r$

**Return**  $(\alpha_m)_{m=1}^{M+1}, (v_m)_{m=1}^{M+1}$ 

---

analysis holds also for more aggressive schemes, in this work, we consider online Mirror Descent algorithm. In this section we briefly recall some material from the primal-dual interpretation of this algorithm that will be used in our subsequent analysis. The material of this section is an adaptation from [37, 33, 38, 36, 35]; we refer to [App. C](#) for a more detailed presentation.

Online Mirror Descent algorithm on a (primal) problem can be derived from the following primal-dual framework in which we introduce an appropriate dual algorithm. Specifically, at each iteration  $m \in \{1, \dots, M\}$ , we consider the following instantaneous primal optimization problem

$$\hat{P}_{m+1} = \inf_{v \in \mathcal{V}} P_{m+1}(v) \quad P_{m+1}(v) = \sum_{j=1}^m g_j(A_j v) + c_m r(v) \quad (4)$$

where  $\mathcal{V}$  is an Euclidean space,  $c_m > 0$ ,  $r \in \Gamma_0(\mathcal{V})$  is a 1-strongly convex function w.r.t. a norm  $\|\cdot\|$  over  $\mathcal{V}$  (with dual norm  $\|\cdot\|_*$ ) such that  $\inf_{v \in \mathcal{V}} r(v) = 0$ , for any  $j \in \{1, \dots, M\}$ , letting  $\mathcal{V}_j$  an Euclidean space,  $g_j \in \Gamma_0(\mathcal{V}_j)$  and  $A_j : \mathcal{V} \rightarrow \mathcal{V}_j$  is a linear operator with adjoint  $A_j^*$ . As explained in [App. C](#), the corresponding dual problem is given by

$$\hat{D}_{m+1} = \inf_{\alpha \in \mathcal{V}_1 \times \dots \times \mathcal{V}_m} D_{m+1}(\alpha) \quad D_{m+1}(\alpha) = \sum_{j=1}^m g_j^*(\alpha_j) + c_m r^*\left(-\frac{1}{c_m} \sum_{j=1}^m A_j^* \alpha_j\right), \quad (5)$$

where  $g_j^*$  and  $r^*$  are respectively the conjugate functions of  $g_j$  and  $r$ . After this, we define the dual scheme in which the dual variable  $\alpha_{m+1}$  is updated by a greedy coordinate descent approach on the dual, setting  $\alpha_{m+1} = (\alpha_m, \alpha'_m)$ , where  $\alpha'_m \in \partial_{\epsilon_m} g_m(A_m v_m)$  is an  $\epsilon_m$ -subgradient of  $g_m$  at  $A_m v_m$  and  $v_m$  is the current primal iteration. The primal variable is then updated from the dual one by a variant of the Karush–Kuhn–Tucker (KKT) conditions, providing its belonging to  $\text{Dom } r$ , see [Alg. 1](#). In this paper, following [36], we refer to such a scheme as lazy online Mirror Descent. However, the term linearized Follow-The-Regularized-Leader is historically more accurate. We recall also that such a scheme includes many well-known algorithms, when one properly specifies the complexity term  $r$ . The behavior of [Alg. 1](#) is analyzed in the next result which will be a key tool for our analysis.

**Theorem 1** (Dual optimality gap for [Alg. 1](#)). *Let  $(v_m)_{m=1}^M$  be the primal iterates returned by [Alg. 1](#) when applied to the generic problem in [Eq. \(4\)](#) and let  $\Delta_{\text{Dual}} = D_{M+1}(\alpha_{M+1}) - \hat{D}_{M+1}$  be the corresponding (non-negative) dual optimality gap at the last dual iterate  $\alpha_{M+1}$  of the algorithm.*

1. *If, for any  $m \in \{1, \dots, M\}$ ,  $c_{m+1} \geq c_m$ , then,*

$$\Delta_{\text{Dual}} \leq - \sum_{m=1}^M g_m(A_m v_m) + \hat{P}_{M+1} + \frac{1}{2} \sum_{m=1}^M \frac{1}{c_m} \|A_m^* \alpha'_m\|_*^2 + \sum_{m=1}^M \epsilon_m.$$

2. *If, for any  $m \in \{1, \dots, M\}$ ,  $c_m = \sum_{j=1}^m \lambda_j$  for some  $\lambda_j > 0$ , then,*

$$\Delta_{\text{Dual}} \leq - \sum_{m=1}^M \left\{ g_m(A_m v_m) + \lambda_m r(v_m) \right\} + \hat{P}_{M+1} + \frac{1}{2} \sum_{m=1}^M \frac{1}{c_m} \|A_m^* \alpha'_m\|_*^2 + \sum_{m=1}^M \epsilon_m.$$

The first (resp. second) inequality in [Thm. 1](#) links the dual optimality gap of the last dual iterate generated by [Alg. 1](#), with the (resp. regularized) cumulative error of the corresponding primal iterates. Note that this result can be readily used to bound the cumulative error (resp. its regularized version) of [Alg. 1](#) by the batch regularized comparative  $\hat{P}_{M+1}$  and additional terms. In the following section, we will make use of the above theorem in order to analyze our OWO Meta-Learning method.

**Algorithm 2** Within-task algorithm

---

**Input**  $\lambda > 0, \theta \in \Theta, Z = (z_i)_{i=1}^n$   
**Initialization**  $s_{\theta,1} = (), w_{\theta,1} = \nabla f(\cdot, \theta)^*(0)$   
**For**  $i = 1$  to  $n$   
    Receive the datapoint  $z_i = (x_i, y_i)$   
    Compute  $s'_{\theta,i} \in \partial \ell_i(\langle x_i, w_{\theta,i} \rangle) \subseteq \mathbb{R}$   
    Define  $(s_{\theta,i+1})_i = s'_{\theta,i}, \gamma_i = \lambda(i+1)$   
    Update  $w_{\theta,i+1} = \nabla f(\cdot, \theta)^* \left( -1/\gamma_i \sum_{j=1}^i x_j s'_{\theta,j} \right)$   
**Return**  $(w_{\theta,i})_{i=1}^{n+1}, \bar{w}_\theta = \frac{1}{n} \sum_{i=1}^n w_{\theta,i}, s_{\theta,n+1}$

---

**Algorithm 3** Meta-algorithm

---

**Input**  $\eta > 0, (Z_t)_{t=1}^T$   
**Initialization**  $\theta_1 = \nabla F^*(0)$   
**For**  $t = 1$  to  $T$   
    Receive incrementally the dataset  $Z_t$   
    Run **Alg. 2** with  $\theta_t$  over  $Z_t$   
    Compute  $s_{\theta_t,n+1}$   
    Compute  $\nabla'_{\theta_t}$  as in **Prop. 3** using  $s_{\theta_t,n+1}$   
    Update  $\theta_{t+1} = \nabla F^* \left( -1/\eta \sum_{j=1}^t \nabla'_{\theta_j} \right)$   
**Return**  $(\theta_t)_{t=1}^{T+1}, \bar{\theta} = \frac{1}{T} \sum_{t=1}^T \theta_t$

---

## 4 Method

In this section we present the proposed OWO Meta-Learning method and we establish a (regularized) cumulative error bound for it. As anticipated in **Sec. 2**, the method consists in the application of **Alg. 1** both to the (non-normalized) within-task problem in **Eq. (2)** and to the across-tasks problem in **Eq. (3)**, corresponding, as we will show in the following, to **Alg. 2** and **Alg. 3**, respectively. In order to analyze our method, we start from studying the behavior of the inner **Alg. 2**.

**Proposition 2** (Dual optimality gap for the inner **Alg. 2**). *Let **Asm. 1** hold. Then, **Alg. 2** coincides with **Alg. 1** applied to the non-normalized within-task problem in **Eq. (2)**. As a consequence, introducing the regularized cumulative error of the iterates generated by **Alg. 2**,*

$$\mathcal{E}_{\text{inner}}^{\text{reg}}(Z, \theta) = \sum_{i=1}^n \left\{ \ell_i(\langle x_i, w_{\theta,i} \rangle) + \lambda f(w_{\theta,i}, \theta) \right\}, \quad (6)$$

where  $w_{\theta,i} \in \text{Dom}f(\cdot, \theta)$  for any  $i \in \{1, \dots, n\}$ , the following upper bound for the associated dual optimality gap  $\Delta_{\text{Dual}}$  introduced in **Thm. 1** holds

$$\Delta_{\text{Dual}} \leq \epsilon_\theta \quad \epsilon_\theta = - \left( \mathcal{E}_{\text{inner}}^{\text{reg}}(Z, \theta) - n \mathcal{L}_Z(\theta) \right) + \frac{1}{2\lambda} \sum_{i=1}^n \frac{1}{i} \|x_i s'_{\theta,i}\|_{\theta,*}^2. \quad (7)$$

**Proof.** The inner **Alg. 2** coincides with **Alg. 1** applied to the non-normalized within-task problem in **Eq. (2)**, once one makes the identifications  $\alpha'_m \rightsquigarrow s'_{\theta,i}$  for the (exact) subgradients and realizes that the non-normalized within-task problem in **Eq. (2)** is of the form in **Eq. (4)** with

$$m \rightsquigarrow M, \quad j \rightsquigarrow i, \quad M \rightsquigarrow n, \quad v \rightsquigarrow w, \quad \mathcal{V} \rightsquigarrow \mathbb{R}^d, \quad g_j \rightsquigarrow \ell_i, \quad A_j \rightsquigarrow x_i^\top, \quad c_m \rightsquigarrow n\lambda, \quad r(\cdot) \rightsquigarrow f(\cdot, \theta).$$

Now, the bound in the statement directly derives from the second point of **Thm. 1**.  $\blacksquare$

Since  $\Delta_{\text{Dual}} \geq 0$ , by moving the terms and normalizing by the number of points  $n$ , the above result tells us that, when the terms  $\|x_i s'_{\theta,i}\|_{\theta,*}^2$  are bounded, for an appropriate choice of  $\lambda$ , the inner algorithm attempts to mimic the function  $\mathcal{L}_Z$  in **Eq. (2)**, as the number of points  $n$  increases. The method we propose in this work relies on the application of **Alg. 1** also to the meta-problem in **Eq. (3)** as the tasks are sequentially observed, using the functions  $(\mathcal{L}_t)_{t=1}^T$  as meta-objectives. A key difficulty here is that the meta-objective is defined via the inner batch problem in **Eq. (2)**, hence it is not available exactly but it is only approximately approached by the within-task online algorithm. From a practical point of view, this means that in this case, differently from the inner algorithm, the resulting meta-algorithm has to deal with an error on the meta-subgradients at each iteration. Our next result describes how, leveraging on the dual optimality gap for the inner **Alg. 2**, we can compute an  $\epsilon$ -subgradient of the meta-objective, where  $\epsilon$  is (up to normalization) the value stated in **Prop. 2**. This will allow us to develop an efficient method which is computationally appealing and fully online.

**Proposition 3** (Computation of an  $\epsilon$ -subgradient of  $\mathcal{L}_Z$ ). *Let **Asm. 1** hold and let  $s_{\theta,n+1}$  be the output of **Alg. 2** with  $\theta \in \Theta$  over the dataset  $Z$ . Let  $\nabla_\theta \in \partial \{-D_{n+1}(s_{\theta,n+1}, \cdot)\}(\theta)$ , where*

$$D_{n+1}(s, \theta) = \sum_{i=1}^n \ell_i^*(s_i) + \lambda n f^*(\cdot, \theta) \left( -\frac{1}{\lambda n} \sum_{i=1}^n x_i s_i \right) \quad s \in \mathbb{R}^n \quad (8)$$

is the dual of the non-normalized [Eq. \(2\)](#). Then,  $\nabla'_\theta = \nabla_\theta/n \in \partial_{\epsilon_\theta/n} \mathcal{L}_Z(\theta)$ , with  $\epsilon_\theta$  as in [Prop. 2](#).

The proof of the above statement is reported in [App. D](#). It is based on rewriting the meta-objective as  $\mathcal{L}_Z(\theta) = 1/n \max_{s \in \mathbb{R}^n} \{-D_{n+1}(s, \theta)\}$  (by strong duality, see [Lemma 34](#) in [App. D](#)) and it essentially exploits [Prop. 2](#), according to which, the last dual iteration  $s_{\theta, n+1}$  returned by [Alg. 2](#) is an  $\epsilon_\theta$ -maximizer of the dual objective  $-D_{n+1}(\cdot, \theta)$ . We remark that the procedure described above to compute an  $\epsilon$ -subgradient has been already used in our work [\[11\]](#) for the statistical setting in [Ex. 1](#). Here, with a different proof technique, we show that it can be extended also to more general inner regularizers. Leveraging on the form of the error on the meta-subgradients in [Prop. 3](#), we now show how we can automatically deduce a (regularized) cumulative error bound for the entire procedure.

**Theorem 4** (Cumulative error bound). *Let [Asm. 1](#) and [Asm. 2](#) hold. Then, [Alg. 3](#) coincides with [Alg. 1](#) applied to the outer-tasks problem in [Eq. \(3\)](#). As a consequence, introducing the regularized cumulative error for the iterates generated by the combination of [Alg. 2](#) and [Alg. 3](#),*

$$\mathcal{E}_{\text{meta}}^{\text{reg}}((Z_t)_{t=1}^T) = \sum_{t=1}^T \mathcal{E}_{\text{inner}}^{\text{reg}}(Z_t, \theta_t) = \sum_{t=1}^T \sum_{i=1}^n \left\{ \ell_{t,i}(\langle x_{t,i}, w_{\theta_t,i} \rangle) + \lambda f(w_{\theta_t,i}, \theta_t) \right\}, \quad (9)$$

where  $\theta_t \in \Theta$  for any  $t \in \{1, \dots, T\}$ , for any sequence of vectors  $(\hat{w}_t)_{t=1}^T$  in  $\mathbb{R}^d$  and any  $\theta \in \Theta$  such that  $f(\hat{w}_t, \theta) < +\infty$  for any  $t \in \{1, \dots, T\}$ , the following upper bound holds

$$\begin{aligned} \mathcal{E}_{\text{meta}}^{\text{reg}}((Z_t)_{t=1}^T) \leq nT & \left( \frac{1}{T} \sum_{t=1}^T \mathcal{R}_{Z_t}(\hat{w}_t) + \frac{\lambda}{T} \sum_{t=1}^T f(\hat{w}_t, \theta) + \frac{1}{2\lambda n T} \sum_{t=1}^T \sum_{i=1}^n \frac{1}{i} \|x_{t,i} s'_{\theta_t,i}\|_{\theta_t,*}^2 \right. \\ & \left. + \frac{\eta F(\theta)}{T} + \frac{1}{2\eta T} \sum_{t=1}^T \|\nabla'_{\theta_t}\|_*^2 \right). \end{aligned}$$

**Proof.** The meta-algorithm in [Alg. 3](#) coincides with [Alg. 1](#) applied to the outer-tasks problem in [Eq. \(3\)](#), once one makes the identifications  $\alpha'_m \rightsquigarrow \nabla'_{\theta_t}$  for the (approximated) subgradients and realizes that the outer-tasks problem in [Eq. \(3\)](#) is of the form in [Eq. \(4\)](#) with

$$m \rightsquigarrow M, \quad j \rightsquigarrow t, \quad M \rightsquigarrow T, \quad v \rightsquigarrow \theta, \quad \mathcal{V} \rightsquigarrow \Theta, \quad g_j \rightsquigarrow \mathcal{L}_t, \quad A_j \rightsquigarrow I, \quad c_m \rightsquigarrow \eta, \quad r \rightsquigarrow F.$$

As a consequence, denoting by  $\Delta_{\text{Dual}}$  the associated dual optimality gap introduced in [Thm. 1](#), specializing the first point of [Thm. 1](#) to this setting and exploiting the fact  $\Delta_{\text{Dual}} \geq 0$ , we get

$$0 \leq - \sum_{t=1}^T \mathcal{L}_t(\theta_t) + \min_{\theta \in \Theta} \left\{ \sum_{t=1}^T \mathcal{L}_t(\theta) + \eta F(\theta) \right\} + \frac{1}{2\eta} \sum_{t=1}^T \|\nabla'_{\theta_t}\|_*^2 + \frac{1}{n} \sum_{t=1}^T \epsilon_{\theta_t}. \quad (10)$$

Substituting the closed form of  $\epsilon_{\theta_t}$  in [Prop. 2](#) (applied to the task  $t$ ) into [Eq. \(10\)](#), one immediately observes that the term  $\sum_{t=1}^T \mathcal{L}_t(\theta_t)$  erases. The desired statement then directly follows by rearranging the remaining terms, using the definition of  $(\mathcal{L}_t)_{t=1}^T$  and multiplying by the number of points  $n$ . ■

When the inputs are bounded and both the inner loss and meta-objective are Lipschitz w.r.t. the associated norms (as we will see for [Ex. 1](#)), the terms  $\|\nabla'_{\theta_t}\|_*^2$  and  $\|x_{t,i} s'_{\theta_t,i}\|_{\theta_t,*}^2$  can be upper bounded by a constant. In this case, for an appropriate choice of  $\lambda$  and  $\eta$ , we recover a reasonable rate  $\tilde{O}(1/\sqrt{n}) + O(1/\sqrt{T})$ . However, when the bounds on  $\|\nabla'_{\theta_t}\|_*^2$  hide a dependency w.r.t.  $\lambda$  or  $n$  (as we will see for [Ex. 2](#)), the bound must be accordingly analyzed.

## 5 Adaptation to the statistical setting

In this section we present guarantees for our method in the statistical setting. Following the framework outlined in [\[6, 23, 26\]](#) we assume that, for any  $t \in \{1, \dots, T\}$ , the within-task dataset  $Z_t$  is an independently identically distributed (i.i.d.) sample from a distribution (task)  $\mu_t$ , and in turn the tasks  $(\mu_t)_{t=1}^T$  are an i.i.d. sample from a meta-distribution  $\rho$ . The estimator we consider here is  $\bar{w}_{\bar{\theta}} = \frac{1}{n} \sum_{i=1}^n w_{\theta,i}$ , the average of the iterates resulting from applying [Alg. 2](#) to a test dataset  $Z$  with meta-parameter  $\bar{\theta} = \frac{1}{T} \sum_{t=1}^T \theta_t$ , the average of the meta-parameters returned by our online meta-algorithm in [Alg. 3](#) applied to the training datasets  $(Z_t)_{t=1}^T$ . We wish to study the performance of such an estimator in expectation w.r.t. the tasks sampled from the environment  $\rho$ .



Formally, for any  $\mu \sim \rho$ , we require that the corresponding true risk  $\mathcal{R}_\mu(w) = \mathbb{E}_{(x,y) \sim \mu} \ell(\langle x, w \rangle, y)$  admits minimizers over the entire space  $\mathbb{R}^d$  and we denote by  $w_\mu$  the minimum norm one. With these ingredients, we introduce the oracle  $\mathcal{E}_\rho = \mathbb{E}_{\mu \sim \rho} \mathcal{R}_\mu(w_\mu)$ , representing the expected minimum error over the environment of tasks, and, introducing the *transfer risk* of the estimator  $\bar{w}_{\bar{\theta}}$ :

$$\mathcal{E}_{\text{stat}}(\bar{w}_{\bar{\theta}}) = \mathbb{E}_{\mu \sim \rho} \mathbb{E}_{Z \sim \mu^n} \mathcal{R}_\mu(\bar{w}_{\bar{\theta}}(Z)), \quad (11)$$

we give a bound on it w.r.t. the oracle  $\mathcal{E}_\rho$ . This is described in the following theorem.

**Theorem 5** (Transfer risk bound). *Let the same assumptions in Thm. 4 hold in the i.i.d. statistical setting. Then, introducing the regularized transfer risk of the average  $\bar{w}_{\bar{\theta}}$  of the iterates resulting from the combination of Alg. 2 and Alg. 3,*

$$\mathcal{E}_{\text{stat}}^{\text{reg}}(\bar{w}_{\bar{\theta}}) = \mathbb{E}_{\mu \sim \rho} \mathbb{E}_{Z \sim \mu^n} \left[ \mathcal{R}_\mu(\bar{w}_{\bar{\theta}}(Z)) + \lambda f(\bar{w}_{\bar{\theta}}(Z), \bar{\theta}) \right],$$

for any  $\theta \in \Theta$  such that  $\mathbb{E}_{\mu \sim \rho} f(w_\mu, \theta) < +\infty$ , the following upper bound holds in expectation w.r.t. the sampling of the datasets  $(Z_t)_{t=1}^T$

$$\begin{aligned} \mathbb{E} \mathcal{E}_{\text{stat}}^{\text{reg}}(\bar{w}_{\bar{\theta}}) &\leq \mathcal{E}_\rho + \lambda \mathbb{E}_{\mu \sim \rho} f(w_\mu, \theta) + \frac{1}{2\lambda n T} \mathbb{E} \sum_{t=1}^T \sum_{i=1}^n \frac{1}{i} \|x_{t,i} s'_{\theta_{t,i}}\|_{\theta_{t,*}}^2 \\ &\quad + \frac{\eta F(\theta)}{T} + \frac{1}{2\eta T} \mathbb{E} \sum_{t=1}^T \|\nabla'_{\theta_t}\|_*^2 + \mathbb{E} \mathbb{E}_{\mu \sim \rho} \mathbb{E}_{Z \sim \mu^n} \frac{1}{2\lambda n} \sum_{i=1}^n \frac{1}{i} \|x_i s'_{\bar{\theta},i}\|_{\bar{\theta},*}^2. \end{aligned}$$

The proof of the statement above is reported in App. E. It exploits the *regularized* cumulative error bound given in Thm. 4 for our Meta-Learning procedure and two nested online-to-batch conversion steps [9, 22], one within-task and one across-tasks. The bound above is composed by the expectation of the terms comparing in Thm. 4 plus an additional term. Such a term comes out from the online-to-batch conversion and, as we will see in the sequel, it does not affect the general behavior of the bound. Finally, we observe that, differently from [1, Thm. 6.1] and [3, Thm. 3.3], the theorem above holds for the average of the meta-parameters  $(\theta_t)_{t=1}^T$  returned by our meta-algorithm (not for a meta-parameter randomly sampled from the pool) and, consequently, it does not require their memorization or the introduction of additional randomization to the process. In the following section we will show that specializing Thm. 4 and Thm. 5 to Ex. 1 and Ex. 2, we will get meaningful bounds.

## 6 Examples

In this section we specify our framework to Ex. 1 and Ex. 2 outlined at the end of Sec. 2. In order to do this, we require the following assumption, which is for instance satisfied by the absolute loss  $\ell(\hat{y}, y) = |\hat{y} - y|$  and the hinge loss  $\ell(\hat{y}, y) = \max\{0, 1 - y\hat{y}\}$ , where  $y, \hat{y} \in \mathcal{Y}$ .

**Assumption 3** (Lipschitz Loss). *Let  $\ell(\cdot, y)$  be  $L$ -Lipschitz for any  $y \in \mathcal{Y}$ .*

Below, for any task  $t \in \{1, \dots, T\}$ , we let the input covariance matrices  $C_t = \frac{1}{n} \sum_{i=1}^n x_{t,i} x_{t,i}^\top$ ,  $\hat{C}_t = \sum_{i=1}^n \frac{1}{i} x_{t,i} x_{t,i}^\top$ ,  $C^{\text{tot}} = \frac{1}{T} \sum_{t=1}^T C_t$  and  $\hat{C}^{\text{tot}} = \frac{1}{T} \sum_{t=1}^T \hat{C}_t$ . We also use the notation  $\|C^{\text{tot}}\|_{\infty, a} = \frac{1}{T} \sum_{t=1}^T \|C_t\|_\infty^a$  with  $a = 1, 2$  and, in the statistical setting, we let  $C_\rho = \mathbb{E}_{\mu \sim \rho} \mathbb{E}_{(x,y) \sim \mu} x x^\top$ .

**Bias.** In App. G we report the adaptation of our method in Alg. 2 and Alg. 3 (cf. Alg. 5 and Alg. 6) and we specify Thm. 4 and Thm. 5 (cf. Cor. 40 and Cor. 42) to Ex. 1. In such a case, the resulting inner algorithm coincides with online Subgradient Descent on the regularized empirical risk and, similarly, the resulting meta-algorithm coincides with online Subgradient Descent (with approximated subgradients) on the meta-objectives  $(\mathcal{L}_t)_{t=1}^T$ . We thus recover the method in [11] with a slightly different choice of the inner algorithm step size. Our results (see App. G.4.2) are in line with [11], where we present the same bound in Cor. 42 with slightly worse constants.

**Feature map.** In App. H.1 we report the adaptation of our method in Alg. 2 and Alg. 3 (cf. Alg. 7 and Alg. 8) to Ex. 2. In this case, the resulting inner algorithm coincides with a pre-conditioned variant of online Subgradient Descent on the regularized empirical risk and the resulting meta-algorithm coincides with a lazy variant of online Subgradient Descent (with approximate subgradients) on the meta-objectives  $(\mathcal{L}_t)_{t=1}^T$ , projected on the set  $\mathcal{S}$ . The meta-algorithm we retrieve is a slightly different version of the algorithm we propose in [12] for an OWB statistical framework.

Our next result specifies the cumulative error bound in Thm. 4 to Ex. 2. The proof is in App. H.2.

**Corollary 6** (Cumulative error bound, feature map). *Let [Asm. 3](#) hold, consider the setting in [Thm. 4](#) applied to [Ex. 2](#) and let  $\hat{C}_{\theta_{1:T}}^{\text{tot}} = \frac{1}{T} \sum_{t=1}^T \theta_t \hat{C}_t$ . Then, for any sequence of vectors  $(\hat{w}_t)_{t=1}^T$  in  $\mathbb{R}^d$ , introducing  $\hat{B} = \frac{1}{T} \sum_{t=1}^T \hat{w}_t \hat{w}_t^\top$ , for any  $\theta \in \mathcal{S}$  such that  $\text{Ran}(\hat{B}) \subseteq \text{Ran}(\theta)$ , the following bound holds for our method with an appropriate choice of hyper-parameters*

$$\mathcal{E}_{\text{meta}}^{\text{reg}}((Z_t)_{t=1}^T) \leq nT \left( \frac{1}{T} \sum_{t=1}^T \mathcal{R}_{Z_t}(\hat{w}_t) + L \sqrt{\text{Tr}(\theta^\dagger \hat{B}) \left( \frac{\text{Tr}(\hat{C}_{\theta_{1:T}}^{\text{tot}})}{n} + \|\theta - \theta_0\|_F \sqrt{\frac{\|C^{\text{tot}}\|_{\infty,2}}{T}} \right)} \right).$$

The next result specifies the transfer risk bound in [Thm. 5](#) to [Ex. 2](#). The proof is in [App. H.3](#).

**Corollary 7** (Transfer risk bound, feature map). *Let [Asm. 3](#) hold and consider the setting in [Thm. 5](#) applied to [Ex. 2](#). Then, in expectation w.r.t. the sampling of the datasets  $(Z_t)_{t=1}^T$ , introducing  $B_\rho = \mathbb{E}_{\mu \sim \rho} w_\mu w_\mu^\top$ , for any  $\theta \in \mathcal{S}$  such that  $\text{Ran}(B_\rho) \subseteq \text{Ran}(\theta)$ , the following bound holds for our method with an appropriate choice of hyper-parameters*

$$\mathbb{E} \mathcal{E}_{\text{stat}}^{\text{reg}}(\bar{w}_{\bar{\theta}}) \leq \mathcal{E}_\rho + L \sqrt{\text{Tr}(\theta^\dagger B_\rho) \left( \frac{2(\log(n) + 1) \text{Tr}(\mathbb{E} \bar{\theta} C_\rho)}{n} + \|\theta - \theta_0\|_F \sqrt{\frac{\mathbb{E} \|C^{\text{tot}}\|_{\infty,2}}{T}} \right)}.$$

We now analyze the statistical setting. Following [\[12, 26, 25\]](#) we study whether, as the number of tasks grows, our method mimics the performance of the inner algorithm with the best feature map in hindsight (*oracle*, see [App. H.4.1](#)) for any task. We note that, once fixed in an appropriate way the meta-parameter  $\theta$  in the statement (hence, the hyper-parameters), the above bound in [Cor. 7](#) becomes comparable to the bound for the best feature map in hindsight, see the discussion in [App. H.4.2](#). Hence, we recover the same conclusion: there is an advantage in using the feature map found by our Meta-Learning method w.r.t. solving each task independently when  $\|C_\rho\|_\infty$  is small (the inputs are high-dimensional, for instance) and  $B_\rho$  is low-rank (the tasks share a low dimensional representation). In addition, note that the bound in [Cor. 7](#) converges, as the number of tasks grow, to the oracle at a rate of  $\mathcal{O}(T^{-1/4})$ , whereas the corresponding bounds for the bias example (cf. [Cor. 40](#) and [Cor. 42](#) in [App. G](#)) yield the faster  $\mathcal{O}(T^{-1/2})$  rate, suggesting that feature learning is a more difficult problem than bias learning. Regarding the non-statistical setting, the bound in [Cor. 6](#) is less clear to interpret because of the presence of the modified version of the inputs' covariance matrix  $\hat{C}_{\theta_{1:T}}^{\text{tot}}$ . Future work may be devoted to investigate this point, which could be either an artifact of our analysis or due to some intrinsic characteristics of the problem we are considering.

## 7 Experiments

We present preliminary experiments with our OWO Meta-Learning method (ONL-ONL)<sup>2</sup> in the statistical setting of [Ex. 2](#). In all experiments, the hyper-parameters  $\lambda$  and  $\eta$  were chosen by a meta-validation procedure (see [App. I](#) for more details) and we fixed  $\theta_0 = I/d$  for the meta-algorithm in [Alg. 8](#). We compared ONL-ONL to the modified batch-online (BAT-ONL) variant, where the meta-subgradients in the meta-training phase are computed with higher accuracy by a convex solver (such as CVX), to Independent-Task Learning (ITL), i.e. running the inner [Alg. 7](#) with the feature map  $\theta = I/d$  for each task, and, in the synthetic data experiment, to the Oracle, i.e. running the inner [Alg. 7](#) with the best feature map in hindsight for each task, see [App. H.4.1](#).

**Synthetic data.** We considered the regression setting with the absolute loss function. We generated  $T_{\text{tot}} = 3600$  tasks. For each task, the corresponding dataset  $(x_i, y_i)_{i=1}^{n_{\text{tot}}}$  of  $n_{\text{tot}} = 80$  points was generated according to the linear equation  $y = \langle x, w_\mu \rangle + \epsilon$ , with  $x$  sampled uniformly on the unit sphere in  $\mathbb{R}^d$  with  $d = 20$  and  $\epsilon$  sampled from a Gaussian distribution,  $\epsilon \sim \mathcal{G}(0, 0.2)$ . The tasks' predictors  $w_\mu$  were generated as  $w_\mu = P \tilde{w}_\mu$  with the components of  $\tilde{w}_\mu \in \mathbb{R}^{d/5}$  sampled from  $\mathcal{G}(0, 1)$  and then  $\tilde{w}_\mu$  normalized to have unit norm, with  $P \in \mathbb{R}^{d \times d/5}$  a matrix with orthonormal columns. In this setting, the operator norm of the inputs' covariance matrix  $C_\rho$  is small (equal to  $1/d$ ) and the weight vectors' covariance matrix  $B_\rho$  is low-rank, a favorable setting for our method, according to [Cor. 7](#). Looking at the results in [Fig. 1](#) (Left), we can state that, in this setting, our method outperforms ITL and it tends to the Oracle as the number of training tasks increases. Moreover, the

<sup>2</sup>The code is available at <https://github.com/dstamos/Adversarial-LTL>



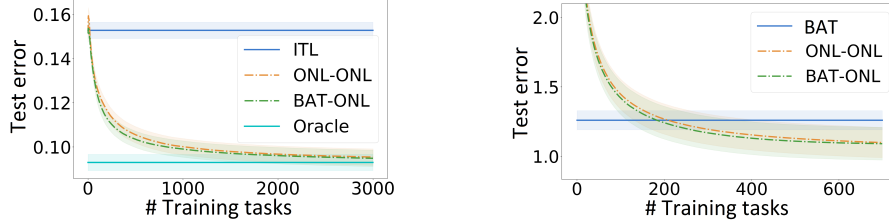

Figure 1: Synthetic data (Left) and Movielens-100k dataset (Right). Performance of different methods as the number of training tasks increases. The results are averaged over 10 runs/splits of the data.

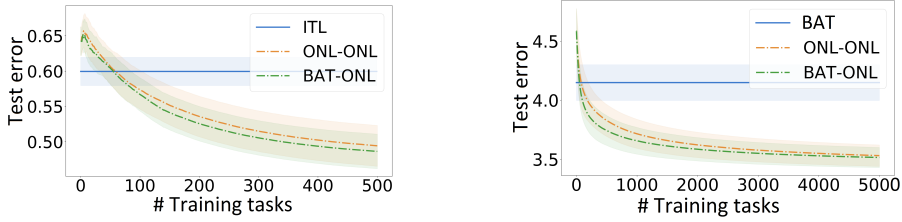

Figure 2: Mini-Wiki dataset (Left) and Jester-1 dataset (Right). Performance of different methods as the number of training tasks increases. The results are averaged over 10 splits of the data.

performance of ONL-ONL and BAT-ONL are comparable, suggesting that our approximation of the meta-subgradients is an effective way to keep the entire process fully online.

**Real data.** We further validated the proposed method on three real datasets: 1) the Movielens-100k dataset<sup>3</sup>, containing the ratings of different users to different movies 2) the Mini-Wiki dataset from [3], containing sentences from Wikipedia pages and 3) the Jester-1 dataset<sup>4</sup>, containing the ratings of different users to different jokes. For the Movielens-100k and the Jester-1 datasets we considered each user as a task and each movie/joke as a point. Specifically, we casted each task as a regression problem where the labels are the ratings of the users and the raw features are simply the index of the movie/joke (i.e. a matrix completion setting where the input dimension  $d$  coincides with the number of points). For the Mini-Wiki dataset we casted each task as a multi-class classification problem where the labels are the Wikipedia pages and the features are vectors with dimension  $d = 50$ . After processing the data, we ended with a total number of  $T_{\text{tot}} = 939, 813, 5700$  tasks and  $n_{\text{tot}} = 939, 128, 100$  points per task for the Movielens-100k, the Mini-Wiki and the Jester-1 datasets, respectively. In the above formulation of the problem for the Movielens-100k and the Jester-1 datasets, it is possible to show that, the ITL algorithm is not able to predict any rate for the films/jokes without observed rates. For this reason, in order to evaluate the performance of the Meta-Learning methods ONL-ONL and BAT-ONL, we decided to introduce a more challenging method for this particular formulation of the problem in which, for the films/jokes without any observed rate, we predicted the rate coinciding with the average of the rates of all the observed users, at the end of the entire sequence of tasks. We denoted this method as BAT. In Fig. 1 (Right) and Fig. 2 we report the performance of the methods by using the absolute loss for the Movielens-100k and the Jester-1 datasets and the multi-class hinge loss for the Mini-Wiki dataset. The results we got are consistent with the synthetic experiments above, showing the effectiveness of our method also in real-life scenarios. We note also that the online Meta-Learning methods outperform the BAT method when the number of training tasks increases.

## 8 Conclusion

We presented a fully online Meta-Learning method stemming from primal-dual Online Learning. Our method can be adapted to a wide class of learning algorithms and it covers various types of tasks' relatedness. By means of a new analysis technique we derived a cumulative error bound for our method based on which it is also possible to obtain guarantees in the statistical setting. We illustrated our framework with two important examples, the bias and the feature learning, improving upon state-of-the-art results. To conclude, we believe that the generality of our framework and our method of proof could be a valuable starting point for future theoretical investigations of Meta-Learning.

<sup>3</sup><https://grouplens.org/datasets/movielens/>

<sup>4</sup><http://goldberg.berkeley.edu/jester-data/>

## Acknowledgments

This work was supported in part by EPSRC Grant N. EP/P009069/1.

## References

- [1] P. Alquier, T. T. Mai, and M. Pontil. Regret bounds for lifelong learning. In *Proceedings of the 20th International Conference on Artificial Intelligence and Statistics*, volume 54 of *Proceedings of Machine Learning Research*, pages 261–269, 2017.
- [2] A. Argyriou, T. Evgeniou, and M. Pontil. Convex multi-task feature learning. *Machine Learning*, 73(3):243–272, 2008.
- [3] M.-F. Balcan, M. Khodak, and A. Talwalkar. Provable guarantees for gradient-based meta-learning. In *International Conference on Machine Learning*, pages 424–433, 2019.
- [4] H. H. Bauschke and P. L. Combettes. *Convex Analysis and Monotone Operator theory in Hilbert Spaces*, volume 408. Springer, 2011.
- [5] J. Baxter. Theoretical models of learning to learn. In *Learning to Learn*, pages 71–94. 1998.
- [6] J. Baxter. A model of inductive bias learning. *J. Artif. Intell. Res.*, 12(149–198):3, 2000.
- [7] S. Boyd and L. Vandenberghe. *Convex optimization*. Cambridge university press, 2004.
- [8] B. Bullins, E. Hazan, A. Kalai, and R. Livni. Generalize across tasks: Efficient algorithms for linear representation learning. In *Algorithmic Learning Theory*, pages 235–246, 2019.
- [9] N. Cesa-Bianchi, A. Conconi, and C. Gentile. On the generalization ability of on-line learning algorithms. *IEEE Transactions on Information Theory*, 50(9):2050–2057, 2004.
- [10] C. Ciliberto, Y. Mroueh, T. Poggio, and L. Rosasco. Convex learning of multiple tasks and their structure. In *International Conference on Machine Learning*, pages 1548–1557, 2015.
- [11] G. Denevi, C. Ciliberto, R. Grazzi, and M. Pontil. Learning-to-learn stochastic gradient descent with biased regularization. In *International Conference on Machine Learning*, pages 1566–1575, 2019.
- [12] G. Denevi, C. Ciliberto, D. Stamos, and M. Pontil. Incremental learning-to-learn with statistical guarantees. In *Proc. 34th Conference on Uncertainty in Artificial Intelligence (UAI)*, 2018.
- [13] G. Denevi, C. Ciliberto, D. Stamos, and M. Pontil. Learning to learn around a common mean. In *Advances in Neural Information Processing Systems*, pages 10190–10200, 2018.
- [14] T. Evgeniou, C. A. Micchelli, and M. Pontil. Learning multiple tasks with kernel methods. *Journal of Machine Learning Research*, 6:615–637, 2005.
- [15] C. Finn, P. Abbeel, and S. Levine. Model-agnostic meta-learning for fast adaptation of deep networks. In *Proceedings of the 34th International Conference on Machine Learning*, volume 70 of *Proceedings of Machine Learning Research*, pages 1126–1135. PMLR, 2017.
- [16] C. Finn, A. Rajeswaran, S. Kakade, and S. Levine. Online meta-learning. In *International Conference on Machine Learning*, pages 1920–1930, 2019.
- [17] R. Gupta and T. Roughgarden. A pac approach to application-specific algorithm selection. *SIAM Journal on Computing*, 46(3):992–1017, 2017.
- [18] L. Jacob, J.-p. Vert, and F. R. Bach. Clustered multi-task learning: A convex formulation. In *Advances in neural information processing systems*, pages 745–752, 2009.
- [19] H.-U. Jean-Baptiste. *Convex analysis and minimization algorithms: advanced theory and bundle methods*. SPRINGER, 2010.

- [20] S. Kakade, S. Shalev-Shwartz, and A. Tewari. On the duality of strong convexity and strong smoothness: Learning applications and matrix regularization. *Unpublished Manuscript*, <http://ttic.uchicago.edu/shai/papers/KakadeShalevTewari09.pdf>, 2(1), 2009.
- [21] M. Khodak, M. Florina-Balcan, and A. Talwalkar. Adaptive gradient-based meta-learning methods. *arXiv preprint arXiv:1906.02717*, 2019.
- [22] N. Littlestone. From on-line to batch learning. In *Proceedings of the second annual workshop on Computational learning theory*, pages 269–284, 1989.
- [23] A. Maurer. Algorithmic stability and meta-learning. *Journal of Machine Learning Research*, 6:967–994, 2005.
- [24] A. Maurer. Transfer bounds for linear feature learning. *Machine Learning*, 75(3):327–350, 2009.
- [25] A. Maurer, M. Pontil, and B. Romera-Paredes. Sparse coding for multitask and transfer learning. In *International Conference on Machine Learning*, 2013.
- [26] A. Maurer, M. Pontil, and B. Romera-Paredes. The benefit of multitask representation learning. *The Journal of Machine Learning Research*, 17(1):2853–2884, 2016.
- [27] A. M. McDonald, M. Pontil, and D. Stamos. New perspectives on k-support and cluster norms. *Journal of Machine Learning Research*, 17(155):1–38, 2016.
- [28] C. A. Micchelli, J. M. Morales, and M. Pontil. Regularizers for structured sparsity. *Advances in Computational Mathematics*, 38(3):455–489, 2013.
- [29] A. Pentina and C. Lampert. A PAC-Bayesian bound for lifelong learning. In *International Conference on Machine Learning*, pages 991–999, 2014.
- [30] A. Pentina and R. Uner. Lifelong learning with weighted majority votes. In *Advances in Neural Information Processing Systems*, pages 3612–3620, 2016.
- [31] J. Peypouquet. *Convex optimization in normed spaces: theory, methods and examples*. Springer, 2015.
- [32] S. Ravi and H. Larochelle. Optimization as a model for few-shot learning. In *15th International Conference on Learning Representations*, 2017.
- [33] S. Shalev-Shwartz. Online learning: theory, algorithms, and applications [ph. d. thesis]. *Hebrew Univ., Jerusalem*, 2007.
- [34] S. Shalev-Shwartz and S. Ben-David. *Understanding Machine Learning: From Theory to Algorithms*. Cambridge University Press, 2014.
- [35] S. Shalev-Shwartz et al. Online learning and online convex optimization. *Foundations and Trends® in Machine Learning*, 4(2):107–194, 2012.
- [36] S. Shalev-Shwartz and S. M. Kakade. Mind the duality gap: Logarithmic regret algorithms for online optimization. In *Advances in Neural Information Processing Systems*, pages 1457–1464, 2009.
- [37] S. Shalev-Shwartz and Y. Singer. Convex repeated games and fenchel duality. In *Advances in neural information processing systems*, pages 1265–1272, 2007.
- [38] S. Shalev-Shwartz and Y. Singer. Logarithmic regret algorithms for strongly convex repeated games. *The Hebrew University*, 2007.
- [39] P. Stange. On the efficient update of the singular value decomposition. In *PAMM: Proceedings in Applied Mathematics and Mechanics*, volume 8, pages 10827–10828. Wiley Online Library, 2008.
- [40] S. Thrun and L. Pratt. *Learning to Learn*. Springer, 1998.
- [41] E. Triantafillou, T. Zhu, V. Dumoulin, P. Lamblin, K. Xu, R. Goroshin, C. Gelada, K. Swersky, P.-A. Manzagol, and H. Larochelle. Meta-dataset: A dataset of datasets for learning to learn from few examples. *arXiv preprint arXiv:1903.03096*, 2019.

# Appendix

The appendix is organized as follows. We start from giving a detailed discussion of previous work in [App. A](#). In [App. B](#) we give some necessary preliminaries from convex analysis that are used throughout this work. In [App. C](#) we recall the general primal-dual Online Learning framework, which is used in [App. C.2](#) to give the proof of [Thm. 1](#) stated in the main body. In [App. D](#) we report the proof of [Prop. 3](#), describing how to compute an approximated meta-subgradient for our meta-objectives. In [App. E](#) we report the proofs of the statements given in the main body in [Sec. 5](#) for the statistical setting. In [App. F](#) we report the results regarding the application of the within-task [Alg. 1](#) with a meta-parameter fixed in hindsight for any task. These results will be used as benchmark to evaluate our meta-procedure aiming at estimating from the data a good meta-parameter for the inner algorithm. Then, in [App. G](#) and [App. H](#) we report the results and the computation needed for specializing the general method described in the paper and the corresponding analysis to the settings outlined in [Ex. 1](#) and [Ex. 2](#), respectively. Finally, in [App. I](#), we provide some experimental details we skipped in the main body.

## A Previous work

We now discuss more in detail some of the papers mentioned above in the main body.

One of the first OWO Meta-Learning framework was presented in [\[1\]](#). In that case, the proposed setting can cover a quite broad family of inner algorithms and, as observed before, it can be adapted by online-to-batch arguments to the statistical framework. However, the main drawback of that work is the fact that the proposed meta-algorithm is not efficient, since it requires memorizing the entire data sequence.

In [\[8, 12\]](#) the authors focus on the statistical OWB setting and they study the family of regularized empirical risk minimizers with the same regularizer introduced in [Ex. 2](#). In [\[8\]](#), the authors consider a Lipschitz loss function and, in order to estimate from the data the feature map parametrizing the family, they propose to apply Frank-Wolfe or Exponentiated-Weighted as meta-algorithm to the functions given by the minimum of the regularized empirical risks associated to the observed tasks (the same meta-objectives used in this work). In [\[12\]](#), the feature map is estimated by projected Gradient Descent applied to the empirical risk of the inner algorithms, without regularizer. As we will see in the following [App. H](#), the meta-algorithm we will use for this setting will be different.

In the more recent work [\[16\]](#), the authors consider under the Meta-Learning perspective the problem of the so-called *fine tuning*, in which the goal is to estimate a good starting point for a prescribed iterative inner algorithm. Specifically, they consider as inner algorithm one step of gradient descent from the point  $\theta$ , namely, for an appropriate step size  $\gamma > 0$ ,  $w_\theta = \theta - \gamma \nabla \hat{f}(\theta)$ , where  $\hat{f}$  is some function, for instance an approximation of the (true) risk. Then, in order to estimate the initial point  $\theta$ , they consider a meta-objective of the form  $\mathcal{L}(\theta) = f(\theta - \gamma \nabla \hat{f}(\theta))$ , where  $f$  is another function with the same intuition of  $\hat{f}$ . The main result in [\[16\]](#) is to show that, under strong assumptions on the functions  $f$  and  $\hat{f}$ , such meta-objective is (strongly) convex in the meta-parameter  $\theta$ . Once proven this, they propose to estimate the starting point applying as meta-algorithm Follow-The-Leader on the sequence of these functions and, relying on the well-known analysis for this algorithm, they state a cumulative error bound for it.

Perhaps closer in spirit to our work is [\[3\]](#). In that work, the authors consider as inner algorithm online Mirror Descent with constant step size and a penalty term given by a Bregman divergence parametrized by a meta-parameter. On the contrary, our inner algorithm corresponds to fixing the step size as  $1/(\lambda(i+1))$  at each iteration and this allows us to derive a *regularized* cumulative error bound. This, as we will see in the following, brings benefits in the statistical setting. Furthermore, the proposed meta-algorithm here is different from the one in [\[3\]](#), in that it works on different objective functions. In their case, as meta-objectives, they consider the sequence of Bregman divergences evaluated at the empirical risk minimizer of the corresponding task, while in our case, we consider the minimum of the entire regularized empirical risk. Such a choice, combined with the primal-dual interpretation of online Mirror Descent and the concept of approximated subgradients, allows us to develop an OWO method without the need of adding further assumptions. On the other hand, in [\[3\]](#), in order to extend their work to the fully online setting, the authors need additional assumptions (specifically a growth condition on the empirical error). We also mention the very

recent (contemporary to our work) sequel [21] where the authors, considering a setting similar to the one described in [3], propose a Meta-Learning approach to estimate also the step-size of the inner algorithm. However, also in this case, the basic version of their method requires to compute a batch within-task empirical risk minimizer and, in order to extend their framework to the fully online setting, they need to introduce additional assumptions on the loss functions.

At last, we briefly discuss our work [11], which is the closest one. As already discussed in Sec. 6 and as we will see in App. G, the method and the analysis proposed there can be recovered from the OWO framework described here for the specific case of Ex. 1 in the statistical setting. In this work, we develop a different analysis which allows us to extend the study to more general family of learning algorithms, also in the non-statistical setting.

## B Preliminaries on convex analysis

In this appendix we recall some basic concepts of convex analysis. We refer to [7, 19, 4, 31] for a complete and detailed overview.

Let  $\mathcal{V}$  be an Euclidean space, i.e a finite dimensional real vector space endowed with an inner product  $\langle \cdot, \cdot \rangle$ . Moreover, for a generic norm  $\| \cdot \|$  over  $\mathcal{V}$ , we recall that its dual norm  $\| \cdot \|_*$  at the point  $\alpha \in \mathcal{V}$  is defined as

$$\| \alpha \|_* = \sup_{v \in \mathcal{V}: \|v\| \leq 1} \langle \alpha, v \rangle. \quad (12)$$

As direct consequence of the definition above, we have the following standard fact.

**Lemma 8** (Generalized Holder's inequality). *For any  $\alpha, w \in \mathcal{V}$ ,*

$$\langle \alpha, w \rangle \leq \| \alpha \|_* \| w \|. \quad (13)$$

**Proof.** We start from observing that  $\|w\| = 0$  if, and only if,  $w = 0$ . If  $w = 0$ , the statement above is obvious. Thus, we consider the case  $w \neq 0$ . In such a case, by definition of the dual norm, we can write the following

$$\langle \alpha, w \rangle = \|w\| \left\langle \alpha, \frac{w}{\|w\|} \right\rangle \leq \|w\| \| \alpha \|_*. \quad (14)$$

This coincides with the desired statement. ■

In the following, we consider extended real-valued functions. We start from giving the following basic definitions, which are frequently used in this work.

**Definition 9** ( $\epsilon$ -minimizer). *A point  $\hat{v}_\epsilon \in \mathcal{V}$  is an  $\epsilon$ -minimizer (with  $\epsilon \geq 0$ ) of a function  $f : \mathcal{V} \rightarrow \mathbb{R} \cup \{+\infty\}$  if, for any  $v \in \mathcal{V}$ ,*

$$f(\hat{v}_\epsilon) \leq f(v) + \epsilon. \quad (15)$$

The concept of exact minimizer is retrieved from the definition above by setting  $\epsilon = 0$ . Moreover, an  $\epsilon$ -maximizer of a function  $f$  must be intended as an  $\epsilon$ -minimizer of the opposite function  $-f$ .

**Definition 10** (Domain of a function, see e.g. [31, Sec. 2.1]). *For a given function  $f : \mathcal{V} \rightarrow \mathbb{R} \cup \{+\infty\}$ , define its domain as*

$$\text{Dom} f = \left\{ v \in \mathcal{V} : f(v) < +\infty \right\} \subseteq \mathcal{V}. \quad (16)$$

**Definition 11** (Epigraph of a function, see e.g. [31, Sec. 2.1]). *For a given function  $f : \mathcal{V} \rightarrow \mathbb{R} \cup \{+\infty\}$ , define its epigraph as*

$$\text{Epi} f = \left\{ (v, t) \in \mathcal{V} \times \mathbb{R} : f(v) \leq t \right\} \subseteq \mathcal{V} \times \mathbb{R}. \quad (17)$$

The above quantities are now exploited to introduce the following basic definitions.

**Definition 12** (Proper function, see e.g. [31, Sec. 2.1]). *A function  $f : \mathcal{V} \rightarrow \mathbb{R} \cup \{+\infty\}$  is proper if  $\text{Dom} f \neq \emptyset$ .*

**Definition 13** (Closed or lower semi-continuous function, see e.g. [31, Sec. 2.2]). *A function  $f : \mathcal{V} \rightarrow \mathbb{R} \cup \{+\infty\}$  is closed or lower semi-continuous if  $\text{Epi} f$  is a closed set of  $\mathcal{V} \times \mathbb{R}$ .*



**Definition 14** (Convex function, see e.g. [31, Sec. 2.3]). A function  $f : \mathcal{V} \rightarrow \mathbb{R} \cup \{+\infty\}$  is convex if, for any  $t \in [0, 1]$  and any  $v, v' \in \text{Dom} f$ ,

$$f(tv + (1-t)v') \leq tf(v) + (1-t)f(v'). \quad (18)$$

The above inequality is known as Jensen's inequality and it can be extended to combinations of more points or expectations of random variables in the following way.

**Lemma 15** (Convex functions and generalized Jensen's inequality, see e.g. [7, Sec. 3.1.8]). Let  $f : \mathcal{V} \rightarrow \mathbb{R} \cup \{+\infty\}$  be a convex function and consider a random variable  $X$  taking values in  $\text{Dom} f$  with probability 1. Then, provided that the following expectations exist,

$$f(\mathbb{E} X) \leq \mathbb{E} f(X). \quad (19)$$

In particular, in the discrete case, for any sequence of vectors  $(v_j)_{j=1}^m \in \mathcal{V}^m$  and weights  $(a_j)_{j=1}^m \in \mathbb{R}^m$  such that  $a_j \geq 0$  for any  $j \in \{1, \dots, m\}$  and  $\sum_{j=1}^m a_j = 1$ , we have

$$f\left(\sum_{j=1}^m a_j v_j\right) \leq \sum_{j=1}^m a_j f(v_j). \quad (20)$$

One key property of convex functions is the following.

**Lemma 16** (Convex functions and continuity, see e.g. [31, Prop. 3.5]). Let  $f : \mathcal{V} \rightarrow \mathbb{R} \cup \{+\infty\}$  be a convex function. Then,  $f$  is continuous on the interior of its domain. In particular, a (real-valued) convex function  $f : \mathcal{V} \rightarrow \mathbb{R}$  is continuous on the entire space  $\mathcal{V}$ .

We now have all the ingredients necessary to introduce the set of functions

$$\Gamma_0(\mathcal{V}) = \left\{ f : \mathcal{V} \rightarrow \mathbb{R} \cup \{+\infty\} : f \text{ is proper, closed and convex} \right\}. \quad (21)$$

We now recall the following definition, which is frequently used in this work.

**Definition 17** ( $\epsilon$ -subdifferential of a function, see e.g. [31, Sec. 3.4]). Let  $\epsilon \geq 0$ . Then, the  $\epsilon$ -subdifferential of  $f \in \Gamma_0(\mathcal{V})$  at the point  $v \in \text{Dom} f$  is the collection of the  $\epsilon$ -subgradients at that point, namely,

$$\partial_\epsilon f(v) = \left\{ \alpha \in \mathcal{V} : f(v') \geq f(v) + \langle \alpha, v' - v \rangle - \epsilon, \text{ for any } v' \in \text{Dom} f \right\}. \quad (22)$$

The standard subdifferential  $\partial f$  is retrieved from the above definition by setting  $\epsilon = 0$ . The following result is a direct consequence of the definition above and it links the concept of the  $\epsilon$ -subdifferential of a function to the corresponding set of  $\epsilon$ -minimizers.

**Lemma 18** (Fermat rule, see e.g. [19, Thm. 1.1.5]).  $\hat{v}_\epsilon \in \mathcal{V}$  is an  $\epsilon$ -minimizer of  $f \in \Gamma_0(\mathcal{V})$  if, and only if,  $0 \in \partial_\epsilon f(\hat{v}_\epsilon)$ .

Before proceeding, we recall the definition of the Fenchel conjugate of a function.

**Definition 19** (Fenchel conjugate of a function, see e.g. [31, Sec. 3.6]). Let  $f \in \Gamma_0(\mathcal{V})$ . Then, its Fenchel conjugate  $f^* : \mathcal{V} \rightarrow \mathbb{R} \cup \{+\infty\}$  is defined at  $\alpha \in \mathcal{V}$  as

$$f^*(\alpha) = \sup_{v \in \mathcal{V}} \langle v, \alpha \rangle - f(v). \quad (23)$$

In our proofs, we exploit the following standard properties of the conjugate function.

**Lemma 20** (Fenchel conjugate and rescaling, see e.g. [7, Sec. 3.3.2]). Let  $f \in \Gamma_0(\mathcal{V})$  and  $c > 0$ . Then, for any  $\alpha \in \mathcal{V}$ ,  $(cf)^*(\alpha) = cf^*(\alpha/c)$ .

**Lemma 21** (Separable functions and Fenchel conjugate, see e.g. [7, Sec. 3.3.2]). Let  $\mathcal{V}_1, \dots, \mathcal{V}_m$  be Euclidean spaces. For any  $v = (v_1, \dots, v_m) \in \mathcal{V}_1 \times \dots \times \mathcal{V}_m$ , let

$$f(v) = \sum_{j=1}^m f_j(v_j), \quad (24)$$

with  $f_j \in \Gamma_0(\mathcal{V}_j)$ . Then, for any  $\alpha = (\alpha_1, \dots, \alpha_m) \in \mathcal{V}_1 \times \dots \times \mathcal{V}_m$ , we have

$$f^*(\alpha) = \sum_{j=1}^m f_j^*(\alpha_j). \quad (25)$$

**Lemma 22** (Fenchel conjugate and monotonicity, see e.g. [31, Prop. 3.50]). *Let  $f_1, f_2 \in \Gamma_0(\mathcal{V})$  such that  $f_1 \leq f_2$ . Then,  $f_1^* \geq f_2^*$ .*

**Lemma 23** (Young-Fenchel inequality, see e.g. [19, Prop. 1.2.1]). *Let  $f \in \Gamma_0(\mathcal{V})$  and consider  $v \in \text{Dom} f$ . Then,  $\alpha \in \partial_\epsilon f(v)$  if, and only if,*

$$f^*(\alpha) - \langle \alpha, v \rangle \leq -f(v) + \epsilon. \quad (26)$$

We now introduce a further definition which is used throughout this work.

**Definition 24** (Lipschitz function, see e.g. [34, Def. 12.6]). *A function  $f : \mathcal{V} \rightarrow \mathbb{R} \cup \{+\infty\}$  is  $L$ -Lipschitz (with  $L > 0$ ) w.r.t. a norm  $\|\cdot\|$  over  $\mathcal{V}$  if, for any  $v, v' \in \text{Dom} f$ ,*

$$|f(v) - f(v')| \leq L \|v - v'\|. \quad (27)$$

The above definition implies the following bound on the dual norm of the subgradients.

**Lemma 25** (Lipschitz functions and bounded subgradients, see e.g. [34, Lemma 14.7]). *Let  $\|\cdot\|$  be a norm over  $\mathcal{V}$  and let  $\|\cdot\|_*$  be its dual. A function  $f : \mathcal{V} \rightarrow \mathbb{R} \cup \{+\infty\}$  with open domain is  $L$ -Lipschitz w.r.t.  $\|\cdot\|$  if, and only if, for any  $v \in \text{Dom} f$  and for any  $\alpha \in \partial f(v)$ ,  $\|\alpha\|_* \leq L$ .*

Another definition we need is the following.

**Definition 26** (Lipschitz smooth function). *Let  $\|\cdot\|$  be a norm over  $\mathcal{V}$  and let  $\|\cdot\|_*$  be its dual. A (real-valued) function  $f : \mathcal{V} \rightarrow \mathbb{R}$  is  $\beta$ -Lipschitz smooth (with  $\beta > 0$ ) w.r.t.  $\|\cdot\|$  if it is differentiable and, for any  $v, v' \in \mathcal{V}$ , it holds that*

$$\|\nabla f(v) - \nabla f(v')\|_* \leq \beta \|v - v'\|. \quad (28)$$

The following result describes a well-known property of Lipschitz smooth functions.

**Lemma 27** (Lipschitz smooth functions and descent lemma, see e.g. [31, Lemma 1.30]). *Let  $f : \mathcal{V} \rightarrow \mathbb{R}$  be a  $\beta$ -Lipschitz smooth function w.r.t. a norm  $\|\cdot\|$  over  $\mathcal{V}$ . Then, for any  $v, v' \in \mathcal{V}$ ,*

$$f(v') \leq f(v) + \langle \nabla f(v), v' - v \rangle + \frac{\beta}{2} \|v' - v\|^2. \quad (29)$$

Before proceeding, we strengthen the notion of convexity as follows.

**Definition 28** (Strongly convex function, see e.g. [31, Sec 2.3]). *A function  $f : \mathcal{V} \rightarrow \mathbb{R} \cup \{+\infty\}$  is  $\sigma$ -strongly convex (with  $\sigma > 0$ ) w.r.t. a norm  $\|\cdot\|$  over  $\mathcal{V}$  if, for any  $t \in [0, 1]$  and any  $v, v' \in \text{Dom} f$ ,*

$$f(tv + (1-t)v') \leq tf(v) + (1-t)f(v') - \frac{\sigma}{2} t(1-t) \|v - v'\|^2. \quad (30)$$

The following result describes a key property of strongly convex functions.

**Lemma 29** (Strongly convex functions and minimizers, see e.g. [31, Prop. 3.23]). *Let  $f : \mathcal{V} \rightarrow \mathbb{R} \cup \{+\infty\}$  be a proper, closed and  $\sigma$ -strongly convex function w.r.t. a norm  $\|\cdot\|$  over  $\mathcal{V}$ . Then,  $f$  admits a minimizer over  $\mathcal{V}$  and such a minimizer is unique.*

We now give two key results for our proofs. The first one describes the duality between strong convexity and Lipschitz smoothness, the second one allows us to study the scaling effect on the Fenchel conjugate function.

**Lemma 30** (Duality between strong convexity and Lipschitz smoothness, see e.g. [20, Thm. 6], [36, Lemma 3]). *Let  $\|\cdot\|$  be a norm over  $\mathcal{V}$  and let  $\|\cdot\|_*$  be its dual. Let  $f : \mathcal{V} \rightarrow \mathbb{R} \cup \{+\infty\}$  be a proper, closed and  $\sigma$ -strongly convex function w.r.t.  $\|\cdot\|$ . Then,  $f^*$  is  $(1/\sigma)$ -Lipschitz smooth w.r.t.  $\|\cdot\|_*$ . Moreover, for any  $\alpha \in \mathcal{V}$ ,*

$$\nabla f^*(\alpha) = \underset{v \in \mathcal{V}}{\operatorname{argmax}} \langle \alpha, v \rangle - f(v) \in \text{Dom} f. \quad (31)$$

**Lemma 31** (Fenchel conjugate and scaling effect, see e.g. [36, Lemma 4]). *Let  $\|\cdot\|$  be a norm over  $\mathcal{V}$  and let  $\|\cdot\|_*$  be its dual. Let  $f \in \Gamma_0(\mathcal{V})$  be a strongly convex function w.r.t.  $\|\cdot\|$  and consider  $c_1, c_2 > 0$ . Then, for any  $\alpha \in \mathcal{V}$ , introducing the vector  $v_{c_2} = \nabla f^*(\alpha/c_2)$ , we have*

$$(c_2 f)^*(\alpha) - (c_1 f)^*(\alpha) = c_2 f^*(\alpha/c_2) - c_1 f^*(\alpha/c_1) \leq (c_1 - c_2) f(v_{c_2}). \quad (32)$$

In the following section we briefly recall the main results we need from Fenchel Duality.

## B.1 Fenchel Duality

For the content in this section, the reader can refer to [31, Sec. 3.6.2]. Given two Euclidean spaces  $\mathcal{V}$  and  $\mathcal{U}$ , a linear operator  $\mathcal{A} : \mathcal{V} \rightarrow \mathcal{U}$  and two functions  $J \in \Gamma_0(\mathcal{V})$  and  $G \in \Gamma_0(\mathcal{U})$ , consider the primal problem

$$\hat{P} = \inf_{v \in \mathcal{V}} P(v) \quad P(v) = G(\mathcal{A}v) + J(v). \quad (33)$$

The associated dual problem reads as follows

$$\hat{D} = \inf_{\alpha \in \mathcal{U}} D(\alpha) \quad D(\alpha) = G^*(\alpha) + J^*(-\mathcal{A}^*\alpha), \quad (34)$$

where  $\mathcal{A}^* : \mathcal{U} \rightarrow \mathcal{V}$  is the adjoint operator of  $\mathcal{A}$  and  $G^*$  and  $J^*$  are the Fenchel conjugates of  $G$  and  $J$ , respectively. We recall also that the *duality gap* associated to two generic points  $v \in \mathcal{V}$  and  $\alpha \in \mathcal{U}$  is defined as

$$P(v) + D(\alpha). \quad (35)$$

It is well known that, for any  $v \in \mathcal{V}$  and  $\alpha \in \mathcal{U}$ , the above quantity is always non-negative, i.e.

$$-D(\alpha) \leq P(v). \quad (36)$$

As a consequence, we have

$$\sup_{\alpha \in \mathcal{U}} \{-D(\alpha)\} = -\inf_{\alpha \in \mathcal{U}} D(\alpha) = -\hat{D} \leq \inf_{v \in \mathcal{V}} P(v) = \hat{P}. \quad (37)$$

The following proposition studies when the above inequality is in fact an equality.

**Proposition 32** (Strong duality, see e.g. [31, Thm. 3.51]). *Consider the primal and the dual problems in Eq. (33) and Eq. (34). Assume that there exist a point  $v \in \text{Dom} J$  such that  $G$  is continuous at  $\mathcal{A}v$  and assume that the primal problem in Eq. (33) admits a solution*

$$\hat{v} \in \operatorname{argmin}_{v \in \mathcal{V}} P(v). \quad (38)$$

*Then, the dual problem in Eq. (34) admits a solution*

$$\hat{\alpha} \in \operatorname{argmin}_{\alpha \in \mathcal{U}} D(\alpha). \quad (39)$$

*Moreover, the following statements hold.*

1. *Strong duality holds, namely,*

$$-\min_{\alpha \in \mathcal{U}} D(\alpha) = -D(\hat{\alpha}) = -\hat{D} = \min_{v \in \mathcal{V}} P(v) = \hat{P}(\hat{v}) = \hat{P}. \quad (40)$$

2. *The optimality conditions, also known as the Karush–Kuhn–Tucker (KKT) conditions, read as follows*

$$\hat{v} \in \partial J^*(-\mathcal{A}^*\hat{\alpha}) \quad \hat{\alpha} \in \partial G(\mathcal{A}\hat{v}). \quad (41)$$

## C Primal-dual Online Learning

In this appendix we recall the primal-dual Online Learning framework. Specifically, in App. C.1 we report some background material which is then used in the following App. C.2 for the proof of Thm. 1 in Sec. 3 in the main body. The material in this appendix is based on [36, 35, 37, 38].

Many online algorithms on a (primal) problem can be derived from the following primal-dual framework. At each iteration  $m \in \{1, \dots, M\}$ , a) we define a pair of *instantaneous* primal-dual problems, b) we update the dual variable according to an appropriate greedy coordinate descent procedure on the dual, c) we update the new primal variable by evaluating the KKT conditions at the current dual variable. We now describe the above steps in detail. Throughout this appendix, we let  $\mathcal{V}$  be an Euclidean space endowed with a scalar product  $\langle \cdot, \cdot \rangle$  and a generic norm  $\|\cdot\|$  with dual  $\|\cdot\|_*$ .

**a) The primal and the dual problems.** Regarding the first step, for any iteration  $m \in \{1, \dots, M\}$ , consider the primal problem of the following form as in Eq. (4)

$$\hat{P}_{m+1} = \inf_{v \in \mathcal{V}} P_{m+1}(v) \quad P_{m+1}(v) = \sum_{j=1}^m g_j(\mathcal{A}_j v) + c_m r(v), \quad (42)$$

where  $c_m > 0$ ,  $r \in \Gamma_0(\mathcal{V})$  is a  $\sigma_r$ -strongly convex function (with  $\sigma_r > 0$ ) w.r.t. a norm  $\|\cdot\|$  such that  $\inf_{v \in \mathcal{V}} r(v) = 0$ , for any  $j \in \{1, \dots, M\}$ , letting  $\mathcal{V}_j$  an Euclidean space,  $g_j \in \Gamma_0(\mathcal{V}_j)$  and  $A_j : \mathcal{V} \rightarrow \mathcal{V}_j$  is a linear operator with adjoint  $A_j^*$ . Even though it is not necessary, to simplify the presentation, we set  $P_1 \equiv 0$ . Introducing the following linear operator

$$\mathcal{A}_m : \mathcal{V} \rightarrow \mathcal{V}_1 \times \dots \times \mathcal{V}_m \quad v \in \mathcal{V} \mapsto (A_1 v, \dots, A_m v) \in \mathcal{V}_1 \times \dots \times \mathcal{V}_m \quad (43)$$

and the function  $G_m \in \Gamma_0(\mathcal{V}_1 \times \dots \times \mathcal{V}_m)$  defined, for any  $\alpha = (\alpha_1, \dots, \alpha_m) \in \mathcal{V}_1 \times \dots \times \mathcal{V}_m$ , as

$$G_m(\alpha) = \sum_{j=1}^m g_j(\alpha_j), \quad (44)$$

we can rewrite the problem in Eq. (42) as

$$\hat{P}_{m+1} = \inf_{v \in \mathcal{V}} P_{m+1}(v) \quad P_{m+1}(v) = G_m(\mathcal{A}_m v) + c_m r(v). \quad (45)$$

Hence, according to what observed in App. B.1, exploiting the separability of  $G_m$  (see Lemma 21 in App. B), using the scaling properties of the conjugate (see Lemma 20 in App. B) and observing that the adjoint operator of  $\mathcal{A}_m$  is give by

$$\mathcal{A}_m^* : \mathcal{V}_1 \times \dots \times \mathcal{V}_m \rightarrow \mathcal{V} \quad \alpha = (\alpha_1, \dots, \alpha_m) \in \mathcal{V}_1 \times \dots \times \mathcal{V}_m \mapsto \sum_{j=1}^m A_j^* \alpha_j \in \mathcal{V}, \quad (46)$$

the dual of the problem in Eq. (42) is given by

$$\hat{D}_{m+1} = \inf_{\alpha \in \mathcal{V}_1 \times \dots \times \mathcal{V}_m} D_{m+1}(\alpha) \quad D_{m+1}(\alpha) = \underbrace{\sum_{j=1}^m g_j^*(\alpha_j)}_{G_m^*(\alpha)} + \underbrace{c_m r^*\left(-\frac{1}{c_m} \sum_{j=1}^m A_j^* \alpha_j\right)}_{(c_m r)^*(-\mathcal{A}_m^* \alpha)}, \quad (47)$$

where  $g_j^*$  and  $r^*$  represent the conjugate function of  $g_j$  and  $r$ , respectively. To simplify, we set also in this case  $D_1 \equiv 0$ . We observe that, when the above problems satisfy the assumptions in Prop. 32 in App. B, since the strong convexity of  $r$  is equivalent to the Lipschitz-smoothness of  $r^*$  (see Lemma 30 in App. B), denoting by  $\hat{v}_{m+1}$  and  $\hat{\alpha}_{m+1}$  a solution of the primal and the dual problem above, the corresponding KKT conditions read as follows

$$\hat{v}_{m+1} = \nabla r^*\left(-\frac{1}{c_m} \mathcal{A}_m^* \hat{\alpha}_{m+1}\right) \quad \hat{\alpha}_{m+1} \in \partial G_m(\mathcal{A}_m \hat{v}_{m+1}), \quad (48)$$

where, more explicitly, we recall that

$$\mathcal{A}_m^* \hat{\alpha}_{m+1} = \sum_{j=1}^m A_j^* \hat{\alpha}_{m+1,j}. \quad (49)$$

We observe that, under the assumptions above, the primal objective  $P_{m+1}$  results to be proper, closed and strongly convex w.r.t. the norm  $\|\cdot\|$ . As a consequence, by Lemma 29 in App. B, we can in fact ensure the existence and the uniqueness of the primal solution  $\hat{v}_{m+1}$ .

We now are ready to describe the dual and the primal updating steps.

**b) c) The updating rules.** The algorithm updates the dual variable  $\alpha_{m+1}$  in a such way that, for a given parameter  $\epsilon_m \geq 0$ , there exist  $\alpha'_m \in \partial_{\epsilon_m} g_m(\mathcal{A}_m v_m)$  such that

$$D_{m+1}(\alpha_{m+1}) \leq D_{m+1}(\underbrace{\alpha_{m,1}, \dots, \alpha_{m,m-1}}_{\alpha_m}, \alpha'_m) = D_{m+1}(\underbrace{\alpha_m}_{\alpha_m}, \alpha'_m). \quad (50)$$

The primal variable is then updated by the KKT conditions from the dual one. More precisely, following [38], in this last step we use a slightly different version of the KKT conditions in which we divide by  $c_{m+1}$  instead of  $c_m$  as in Eq. (48). For more details we refer to Alg. 4, which is a more general version of Alg. 1 given in the main body in Sec. 3. We also observe that, by definition, thanks to Lemma 30 in App. B, the primal variables  $(v_m)_{m=1}^M$  generated by the algorithm are guaranteed to belong to  $\text{Dom } r$ .

Note that the requirement above about the dual update in Eq. (50) is satisfied (with the equality) by the update described in the main body  $\alpha_{m+1} = (\alpha_m, \alpha'_m)$ . The resulting primal algorithm

---

**Algorithm 4** Primal-dual online algorithm (more general version of Alg. 1)

---

**Input**  $(g_m)_{m=1}^M, (A_m)_{m=1}^M, (c_m)_{m=1}^M, (\epsilon_m)_{m=1}^M, r$  as described in the text  
**Initialization**  $\alpha_1 = (), v_1 = \nabla r^*(0) \in \text{Dom } r$   
**For**  $m = 1$  to  $M$   
    Receive  $g_m, A_m, c_{m+1}, \epsilon_m$   
    Suffer  $g_m(A_m v_m)$  and compute  $\alpha'_m \in \partial_{\epsilon_m} g_m(A_m v_m)$   
    Update  $\alpha_{m+1}$  according to Eq. (50) by using  $\alpha'_m$   
    Define  $v_{m+1} = \nabla r^*(-1/c_{m+1} \mathcal{A}_m^* \alpha_{m+1}) = \nabla r^*(-1/c_{m+1} \sum_{j=1}^m A_j^* \alpha_{m+1,j}) \in \text{Dom } r$   
**Return**  $(\alpha_m)_{m=1}^{M+1}, (v_m)_{m=1}^{M+1}$ 

---

coincides in this case with a lazy variant of online Mirror Descent. However, we stress that Eq. (50) is satisfied also by other more aggressive dual steps, including for example the one generating the primal Follow-The-Regularized-Leader updating scheme. We refer to [36, 35, 37, 38] for more details about this.

We finally conclude by observing that the framework above is a slightly different version of the standard primal-dual Online Learning setting described in the papers mentioned above. The differences in our presentation are the introduction of the linear operators  $(A_m)_{m=1}^M$  inside the functions  $(g_m)_{m=1}^M$  and the possibility to deal with an approximation of the subdifferential  $\partial g_m(A_m v_m)$ . These two modifications will allow us to adapt the theory above to the Meta-Learning setting described in the main body.

### C.1 Main inequality on the dual gap

In the next proposition we study the behavior of the gap between two consecutive iterations on the dual objective for Alg. 4 (or Alg. 1). This statement will be the main tool used in App. C.2 in order to prove Thm. 1 in Sec. 3.

**Proposition 33** (Dual Gap, see [33, Lemma 1]). *Let  $(\alpha_m)_{m=1}^{M+1}$  and  $(v_m)_{m=1}^{M+1}$  be the iterates returned by Alg. 4 (or Alg. 1). Then,*

$$\Delta_1 = D_2(\alpha_2) - D_1(\alpha_1) \leq -g_1(A_1 v_1) + \frac{1}{2\sigma_r c_1} \|A_1^* \alpha'_1\|_*^2 + \epsilon_1. \quad (51)$$

Furthermore, for any  $m \in \{2, \dots, M\}$ , we have

$$\begin{aligned} \Delta_m &= D_{m+1}(\alpha_{m+1}) - D_m(\alpha_m) \\ &\leq -g_m(A_m v_m) + \frac{1}{2\sigma_r c_m} \|A_m^* \alpha'_m\|_*^2 + \epsilon_m \\ &\quad + c_m r^*\left(-\frac{1}{c_m} \mathcal{A}_{m-1}^* \alpha_m\right) - c_{m-1} r^*\left(-\frac{1}{c_{m-1}} \mathcal{A}_{m-1}^* \alpha_m\right). \end{aligned} \quad (52)$$

**Proof.** We first prove Eq. (51). Thanks to the updating rule in Eq. (50), the closed form of the dual objective in Eq. (47) and the definition  $D_1 \equiv 0$ , we can write

$$\Delta_1 = D_2(\alpha_2) - D_1(\alpha_1) = D_2(\alpha_2) \leq D_2(\alpha'_1) = g_1^*(\alpha'_1) + c_1 r^*\left(-\frac{1}{c_1} A_1^* \alpha'_1\right), \quad (53)$$

where  $\alpha'_1 \in \partial_{\epsilon_1} g_1(A_1 v_1)$  is the approximated subgradient used by Alg. 4 (or Alg. 1). But, thanks to Lemma 30 in App. B, the  $\sigma_r$ -strong convexity of  $r$  w.r.t.  $\|\cdot\|$  is equivalent to the  $(1/\sigma_r)$ -Lipschitz smoothness of  $r^*$  w.r.t.  $\|\cdot\|_*$ , hence, applying Lemma 27 in App. B, exploiting the definition of  $v_1$  in Alg. 4 (or Alg. 1) and the assumption  $r^*(0) = \inf_{v \in \mathcal{V}} r(v) = 0$ , we have

$$\begin{aligned} r^*\left(-\frac{1}{c_1} A_1^* \alpha'_1\right) &\leq r^*(0) - \frac{1}{c_1} \langle \nabla r^*(0), A_1^* \alpha'_1 \rangle + \frac{1}{2\sigma_r c_1^2} \|A_1^* \alpha'_1\|_*^2 \\ &= -\frac{1}{c_1} \langle v_1, A_1^* \alpha'_1 \rangle + \frac{1}{2\sigma_r c_1^2} \|A_1^* \alpha'_1\|_*^2. \end{aligned} \quad (54)$$



Substituting in Eq. (53), we get the statement

$$\begin{aligned}\Delta_1 &\leq g_1^*(\alpha'_1) + c_1 r^*\left(-\frac{1}{c_1} A_1^* \alpha'_1\right) \leq g_1^*(\alpha'_1) - \langle v_1, A_1^* \alpha'_1 \rangle + \frac{1}{2\sigma_r c_1} \|A_1^* \alpha'_1\|_*^2 \\ &\leq -g_1(A_1 v_1) + \epsilon_1 + \frac{1}{2\sigma_r c_1} \|A_1^* \alpha'_1\|_*^2,\end{aligned}\quad (55)$$

where, in the last inequality, we have exploited the fact that  $\alpha'_1 \in \partial_{\epsilon_1} g_1(A_1 v_1)$  and Lemma 23 in App. B. We now prove the statement for  $m \in \{2, \dots, M\}$ . By Eq. (50), the closed form of the dual objective in Eq. (47) and the rewriting

$$\mathcal{A}_m^* \alpha_{m+1} = \mathcal{A}_{m-1}^* \alpha_m + A_m^* \alpha'_m, \quad (56)$$

with  $\alpha'_m \in \partial_{\epsilon_m} g_m(A_m v_m)$  the approximated subgradient used by Alg. 4 (or Alg. 1), we have

$$\begin{aligned}\Delta_m &= D_{m+1}(\alpha_{m+1}) - D_m(\alpha_m) \leq D_{m+1}(\alpha_m, \alpha'_m) - D_m(\alpha_m) \\ &= g_m^*(\alpha'_m) + c_m r^*\left(-\frac{1}{c_m} \mathcal{A}_{m-1}^* \alpha_m - \frac{1}{c_m} A_m^* \alpha'_m\right) - c_{m-1} r^*\left(-\frac{1}{c_{m-1}} \mathcal{A}_{m-1}^* \alpha_m\right).\end{aligned}\quad (57)$$

Again, thanks to Lemma 30 in App. B, the  $\sigma_r$ -strong convexity of  $r$  w.r.t.  $\|\cdot\|$  is equivalent to the  $(1/\sigma_r)$ -Lipschitz smoothness of  $r^*$  w.r.t.  $\|\cdot\|_*$ , hence, applying Lemma 27 in App. B and exploiting the definition of  $v_m$  in Alg. 4 (or Alg. 1), we have

$$\begin{aligned}&r^*\left(-\frac{1}{c_m} \mathcal{A}_{m-1}^* \alpha_m - \frac{1}{c_m} A_m^* \alpha'_m\right) \\ &\leq r^*\left(-\frac{1}{c_m} \mathcal{A}_{m-1}^* \alpha_m\right) - \frac{1}{c_m} \left\langle \nabla r^*\left(-\frac{1}{c_m} \mathcal{A}_{m-1}^* \alpha_m\right), A_m^* \alpha'_m \right\rangle + \frac{1}{2\sigma_r c_m^2} \|A_m^* \alpha'_m\|_*^2 \\ &= r^*\left(-\frac{1}{c_m} \mathcal{A}_{m-1}^* \alpha_m\right) - \frac{1}{c_m} \langle v_m, A_m^* \alpha'_m \rangle + \frac{1}{2\sigma_r c_m^2} \|A_m^* \alpha'_m\|_*^2.\end{aligned}$$

Substituting into Eq. (57), we can write the following

$$\begin{aligned}\Delta_m &\leq g_m^*(\alpha'_m) + c_m r^*\left(-\frac{1}{c_m} \mathcal{A}_{m-1}^* \alpha_m - \frac{1}{c_m} A_m^* \alpha'_m\right) - c_{m-1} r^*\left(-\frac{1}{c_{m-1}} \mathcal{A}_{m-1}^* \alpha_m\right) \\ &\leq g_m^*(\alpha'_m) - \langle v_m, A_m^* \alpha'_m \rangle + \frac{1}{2\sigma_r c_m} \|A_m^* \alpha'_m\|_*^2 \\ &\quad + c_m r^*\left(-\frac{1}{c_m} \mathcal{A}_{m-1}^* \alpha_m\right) - c_{m-1} r^*\left(-\frac{1}{c_{m-1}} \mathcal{A}_{m-1}^* \alpha_m\right) \\ &\leq -g_m(A_m v_m) + \epsilon_m + \frac{1}{2\sigma_r c_m} \|A_m^* \alpha'_m\|_*^2 \\ &\quad + c_m r^*\left(-\frac{1}{c_m} \mathcal{A}_{m-1}^* \alpha_m\right) - c_{m-1} r^*\left(-\frac{1}{c_{m-1}} \mathcal{A}_{m-1}^* \alpha_m\right),\end{aligned}$$

where, in the last inequality, we have exploited the fact that  $\alpha'_m \in \partial_{\epsilon_m} g_m(A_m v_m)$  and Lemma 23 in App. B. The last inequality above coincides with the desired statement. ■

## C.2 Proof of Thm. 1

In this section, starting from the result described above in Prop. 33, we present the proof of Thm. 1 reported in the main body. More precisely, we provide the proof of a more general statement with a generic strong convexity parameter  $\sigma_r > 0$  for the function  $r$ . For convenience of the reader, we restate Thm. 1 here. The first point of the statement below is an adaptation of [33, Lemma 1], while, for the second point, we refer to [36, Lemma 5].

**Theorem 1** (Dual optimality gap for Alg. 1). *Let  $(v_m)_{m=1}^M$  be the primal iterates returned by Alg. 1 when applied to the generic problem in Eq. (4) and let  $\Delta_{\text{Dual}} = D_{M+1}(\alpha_{M+1}) - \hat{D}_{M+1}$  be the corresponding (non-negative) dual optimality gap at the last dual iterate  $\alpha_{M+1}$  of the algorithm.*

1. *If, for any  $m \in \{1, \dots, M\}$ ,  $c_{m+1} \geq c_m$ , then,*

$$\Delta_{\text{Dual}} \leq -\sum_{m=1}^M g_m(A_m v_m) + \hat{P}_{M+1} + \frac{1}{2} \sum_{m=1}^M \frac{1}{c_m} \|A_m^* \alpha'_m\|_*^2 + \sum_{m=1}^M \epsilon_m.$$

2. If for any  $m \in \{1, \dots, M\}$ ,  $c_m = \sum_{j=1}^m \lambda_j$  for some  $\lambda_j > 0$ , then,

$$\Delta_{\text{Dual}} \leq - \sum_{m=1}^M \left\{ g_m(A_m v_m) + \lambda_m r(v_m) \right\} + \hat{P}_{M+1} + \frac{1}{2} \sum_{m=1}^M \frac{1}{c_m} \|A_m^* \alpha'_m\|_*^2 + \sum_{m=1}^M \epsilon_m.$$

### C.3 Proof of Thm. 1 point 1.

In this subsection we prove the first point of Thm. 1, namely, the bound linking the optimality reached by the last dual iteration of Alg. 4 (or Alg. 1) to the cumulative error of the corresponding primal iterates.

**Proof of Thm. 1 point 1.** We first show that, for any  $m \in \{1, \dots, M\}$ ,

$$\Delta_m \leq -g_m(A_m v_m) + \frac{1}{2\sigma_r c_m} \|A_m^* \alpha'_m\|_*^2 + \epsilon_m. \quad (58)$$

As described in Prop. 33, the statement above in Eq. (58) holds for the case  $m = 1$ . For  $m \in \{2, \dots, M\}$ , we observe the following. Thanks to the choice of the increasing parameters  $c_{m+1} \geq c_m$  and the non-negativity of  $r$ , according to Lemma 22 in App. B, we have

$$\begin{aligned} c_m r^* \left( -\frac{1}{c_m} \mathcal{A}_{m-1}^* \alpha_m \right) - c_{m-1} r^* \left( -\frac{1}{c_{m-1}} \mathcal{A}_{m-1}^* \alpha_m \right) \\ = (c_m r)^* (-\mathcal{A}_{m-1}^* \alpha_m) - (c_{m-1} r)^* (-\mathcal{A}_{m-1}^* \alpha_m) \leq 0. \end{aligned} \quad (59)$$

Substituting this last inequality in Prop. 33, we get the statement in Eq. (58) for  $m \in \{2, \dots, M\}$ . Now, we observe that, thanks to the definition  $D_1 \equiv 0$ , we can write

$$D_{M+1}(\alpha_{M+1}) = \sum_{m=1}^M \Delta_m + D_1(\alpha_1) = \sum_{m=1}^M \Delta_m. \quad (60)$$

Thus, summing Eq. (58) over  $m \in \{1, \dots, M\}$ , we obtain that

$$D_{M+1}(\alpha_{M+1}) \leq - \sum_{m=1}^M g_m(A_m v_m) + \frac{1}{2\sigma_r} \sum_{m=1}^M \frac{1}{c_m} \|A_m^* \alpha'_m\|_*^2 + \sum_{m=1}^M \epsilon_m. \quad (61)$$

The desired statement now follows by summing to this last inequality the following relation

$$-\hat{D}_{M+1} \leq \hat{P}_{M+1}, \quad (62)$$

coinciding with the non-negativity of the duality gap in Eq. (37). ■

### C.4 Proof of Thm. 1 point 2.

In this subsection we prove the second point of Thm. 1, namely, the bound linking the optimality reached by the last dual iteration of Alg. 4 (or Alg. 1) to the *regularized* cumulative error of the corresponding primal iterates.

**Proof of Thm. 1 point 2.** We first show that, for any  $m \in \{1, \dots, M\}$ ,

$$\Delta_m \leq -\left(g_m(A_m v_m) + \lambda_m r(v_m)\right) + \frac{1}{2\sigma_r c_m} \|A_m^* \alpha'_m\|_*^2 + \epsilon_m. \quad (63)$$

Thanks to the definition  $v_1 = \nabla r^*(0)$  in Alg. 4 (or Alg. 1), Lemma 30 in App. B and the assumption  $\inf_{v \in \mathcal{V}} r(v) = 0$ , we can write  $r(v_1) = r(\nabla r^*(0)) = \inf_{v \in \mathcal{V}} r(v) = 0$ . As a consequence, by Prop. 33, the above statement in Eq. (63) holds for the case  $m = 1$ . For any  $m \in \{2, \dots, M\}$ , introducing the notation  $\lambda_{1:m} = \sum_{j=1}^m \lambda_j$ , we can write

$$\begin{aligned} c_m r^* \left( -\frac{1}{c_m} \mathcal{A}_{m-1}^* \alpha_m \right) - c_{m-1} r^* \left( -\frac{1}{c_{m-1}} \mathcal{A}_{m-1}^* \alpha_m \right) \\ \leq (c_{m-1} - c_m) r \left( \nabla r^* \left( -\frac{1}{c_m} \mathcal{A}_{m-1}^* \alpha_m \right) \right) \\ = (\lambda_{1:m-1} - \lambda_{1:m}) r \left( \nabla r^* \left( -\frac{1}{\lambda_{1:m}} \mathcal{A}_{m-1}^* \alpha_m \right) \right) \\ = (\lambda_{1:m-1} - \lambda_{1:m}) r(v_m) = -\lambda_m r(v_m), \end{aligned} \quad (64)$$

where, in the inequality we have applied [Lemma 31](#) in [App. B](#) to  $c_1 \rightsquigarrow c_{m-1}$ ,  $c_2 \rightsquigarrow c_m$ ,  $f \rightsquigarrow r$ ,  $\alpha \rightsquigarrow -A_{m-1}^* \alpha_m$ , in the first equality we have introduced the definition of the parameter  $c_m = \lambda_{1:m}$  and in the second equality we have exploited the definition of  $v_m$  in [Alg. 4](#) (or [Alg. 1](#)). Substituting this last inequality in [Prop. 33](#), we get the statement in [Eq. \(63\)](#) for  $m \in \{2, \dots, M\}$ . Now, we observe again that, thanks to the definition  $D_1 \equiv 0$ , we have

$$D_{M+1}(\alpha_{M+1}) = \sum_{m=1}^M \Delta_m + D_1(\alpha_1) = \sum_{m=1}^M \Delta_m. \quad (65)$$

Thus, summing [Eq. \(63\)](#) over  $m \in \{1, \dots, M\}$ , we obtain

$$D_{M+1}(\alpha_{M+1}) \leq -\left(\sum_{m=1}^M g_m(A_m v_m) + \lambda_m r(v_m)\right) + \frac{1}{2\sigma_r} \sum_{m=1}^M \frac{1}{\lambda_{1:m}} \|A_m^* \alpha'_m\|_*^2 + \sum_{m=1}^M \epsilon_m.$$

Also in this case, the desired statement follows by summing to this last inequality the following relation

$$-\hat{D}_{M+1} \leq \hat{P}_{M+1}, \quad (66)$$

coinciding the non-negativity of the duality gap in [Eq. \(37\)](#).  $\blacksquare$

## D Computation of the approximated meta-subgradients, proof of [Prop. 3](#)

In this section we report the proof of [Prop. 3](#), describing how to compute an approximate subgradient for our meta-objectives. In order to do this, we need the following technical lemma.

**Lemma 34** (Strong duality for the within-task problem). *Let [Asm. 1](#) hold. For any dataset  $Z$  and any meta-parameter  $\theta \in \Theta$ , consider the non-normalized primal within-task problem in [Eq. \(2\)](#). Then, the corresponding dual problem with objective in [Eq. \(8\)](#) admits a solution*

$$\hat{s}_\theta \in \operatorname{argmin}_{s \in \mathbb{R}^n} D_{n+1}(s, \theta). \quad (67)$$

Moreover, the following statements hold.

1. Strong duality holds, namely, we have

$$n \mathcal{L}_Z(\theta) = -\min_{s \in \mathbb{R}^n} D_{n+1}(s, \theta). \quad (68)$$

2. The KKT conditions read as follows

$$\hat{w}_\theta = \nabla f(\cdot, \theta)^* \left( -\frac{1}{\lambda n} \sum_{i=1}^n x_i \hat{s}_{\theta,i} \right) \quad \hat{s}_\theta \in \partial \left( \sum_{i=1}^n \ell_i \right) (\langle x_1, \hat{w}_\theta \rangle, \dots, \langle x_n, \hat{w}_\theta \rangle), \quad (69)$$

where, we recall that  $\hat{w}_\theta$  is the minimizer of the primal problem in [Eq. \(2\)](#).

**Proof.** We rely on the standard result reported in [Prop. 32](#) in [App. B.1](#) according to which, the desired statements hold for the couples of within-task primal-dual problems above if, for any  $\theta \in \Theta$ , 1) the primal problem admits a solution and 2) there exist a point in  $\operatorname{Dom} f(\cdot, \theta)$  where the function  $\sum_{i=1}^n \ell_i(\langle x_i, \cdot \rangle)$  is continuous. Regarding the point 1), as already observed in the main body, the existence of the primal solution  $\hat{w}_\theta$  is ensured by [Asm. 1](#). Regarding the point 2), we observe that, thanks to [Asm. 1](#), the function  $\sum_{i=1}^n \ell_i(\langle x_i, \cdot \rangle)$  is real-valued. As a consequence, since a convex real-valued function is continuous over the entire space (see [Lemma 16](#) in [App. B](#)), also the continuity requirement above is satisfied. Hence, the desired statement directly derives from specializing [Prop. 32](#) in [App. B](#) to our context, observing that the strong convexity of  $f(\cdot, \theta)$  is equivalent to the Lipschitz-smoothness of  $f(\cdot, \theta)^*$  (see [Lemma 30](#) in [App. B](#)).  $\blacksquare$

We now are ready to prove [Prop. 3](#).

**Proposition 3** (Computation of an  $\epsilon$ -subgradient of  $\mathcal{L}_Z$ ). *Let [Asm. 1](#) hold and let  $s_{\theta,n+1}$  be the output of [Alg. 2](#) with  $\theta \in \Theta$  over the dataset  $Z$ . Let  $\nabla_\theta \in \partial \{-D_{n+1}(s_{\theta,n+1}, \cdot)\}(\theta)$ , where*

$$D_{n+1}(s, \theta) = \sum_{i=1}^n \ell_i^*(s_i) + \lambda n f^*(\cdot, \theta) \left( -\frac{1}{\lambda n} \sum_{i=1}^n x_i s_i \right) \quad s \in \mathbb{R}^n \quad (8)$$

is the dual of the non-normalized [Eq. \(2\)](#). Then,  $\nabla'_\theta = \nabla_\theta / n \in \partial_{\epsilon_\theta/n} \mathcal{L}_Z(\theta)$ , with  $\epsilon_\theta$  as in [Prop. 2](#).

**Proof.** We start from recalling that, for any  $\theta \in \Theta$ , the function  $D_{n+1}(\cdot, \theta)$  reported in Eq. (8) is the objective of the dual problem associated to the non-normalized within-task problem in Eq. (2). Since in our assumptions, strong duality holds for this couple of problems (see Lemma 34 above), we can rewrite

$$\mathcal{L}_Z(\theta) = \max_{s \in \mathbb{R}^n} \tilde{D}_{n+1}(s, \theta) \quad \tilde{D}_{n+1}(s, \theta) = -\frac{1}{n} D_{n+1}(s, \theta). \quad (70)$$

Thanks to Prop. 2, we know that the dual vector  $s_{\theta, n+1}$  returned by Alg. 2 is an  $\epsilon_\theta$ -minimizer of the dual objective  $D_{n+1}(\cdot, \theta)$ , where  $\epsilon_\theta$  is given in Prop. 2. Consequently,  $s_{\theta, n+1}$  is an  $(\epsilon_\theta/n)$ -maximizer of the function  $\tilde{D}_{n+1}(\cdot, \theta)$  defined above. We now observe that, for any  $\theta' \in \Theta$ , we have

$$\begin{aligned} \mathcal{L}_Z(\theta') &= \max_{s \in \mathbb{R}^n} \tilde{D}_{n+1}(s, \theta') \geq \tilde{D}_{n+1}(s_{\theta, n+1}, \theta') \\ &\geq \tilde{D}_{n+1}(s_{\theta, n+1}, \theta) + \left\langle \frac{\nabla_\theta}{n}, \theta' - \theta \right\rangle \geq \mathcal{L}_Z(\theta) - \frac{\epsilon_\theta}{n} + \left\langle \frac{\nabla_\theta}{n}, \theta' - \theta \right\rangle, \end{aligned}$$

where, in the second inequality we have exploited the assumption  $\nabla_\theta \in \partial\{-D_{n+1}(s_{\theta, n+1}, \cdot)\}(\theta)$ , implying  $\nabla_\theta/n \in \partial\tilde{D}_{n+1}(s_{\theta, n+1}, \cdot)(\theta)$ , and in the last inequality we have used the fact that  $s_{\theta, n+1}$  is an  $(\epsilon_\theta/n)$ -maximizer of the function  $\tilde{D}_{n+1}(\cdot, \theta)$  as explained above and strong duality again. By definition of  $\epsilon$ -subgradients, the above inequality proves the desired statement. ■

## E Proofs of the statements in the statistical setting

In this section we report the proof of the transfer risk bound in Thm. 5 in Sec. 5. In order to do this, we require the following intermediate result.

**Proposition 35** (Online-to-batch conversion). *Under the same assumptions of Thm. 4, in expectation w.r.t. the sampling of the datasets  $(Z_t)_{t=1}^T$ , it holds that*

$$\mathbb{E} \mathcal{E}_{\text{stat}}^{\text{reg}}(\bar{w}_{\bar{\theta}}) \leq \mathbb{E} \frac{1}{nT} \mathcal{E}_{\text{meta}}^{\text{reg}}((Z_t)_{t=1}^T) + \mathbb{E} \mathbb{E}_{\mu \sim \rho} \mathbb{E}_{Z \sim \mu^n} \frac{1}{2\lambda n} \sum_{i=1}^n \frac{1}{i} \|x_i s'_{\bar{\theta}, i}\|_{\bar{\theta}, *}^2.$$

**Proof.** Throughout this proof, for any  $\theta \in \Theta$ , we will need to make explicit the dependency w.r.t. the dataset in the iterations  $(w_{\theta, i})_{i=1}^n$  generated by Alg. 2, in their average  $\bar{w}_\theta$  and in the regularized empirical risk minimizer

$$\hat{w}_\theta = \operatorname{argmin}_{w \in \mathbb{R}^d} \mathcal{R}_{\theta, Z}(w) \quad \mathcal{R}_{\theta, Z}(w) = \mathcal{R}_Z(w) + \lambda f(w, \theta). \quad (71)$$

Moreover, for any  $\theta \in \Theta$  and any  $\mu \sim \rho$ , by arguments similar to the ones made for the existence of  $\hat{w}_\theta$ , exploiting Asm. 1, we manage to ensure the existence and the uniqueness of the regularized (true) risk minimizer

$$w_{\theta, \mu} = \operatorname{argmin}_{w \in \mathbb{R}^d} \mathcal{R}_{\theta, \mu}(w) \quad \mathcal{R}_{\theta, \mu}(w) = \mathcal{R}_\mu(w) + \lambda f(w, \theta). \quad (72)$$

In the sequel, we will also use also the short-hand notation

$$C = \mathbb{E} \mathbb{E}_{\mu \sim \rho} \mathbb{E}_{Z \sim \mu^n} \frac{1}{2\lambda n} \sum_{i=1}^n \frac{1}{i} \|x_i s'_{\bar{\theta}, i}\|_{\bar{\theta}, *}^2. \quad (73)$$

The desired statement can be written more explicitly as follows

$$\mathbb{E} \mathbb{E}_{\mu \sim \rho} \mathbb{E}_{Z \sim \mu^n} \mathcal{R}_{\bar{\theta}, \mu}(\bar{w}_{\bar{\theta}}(Z)) \leq \mathbb{E} \frac{1}{T} \sum_{t=1}^T \frac{1}{n} \sum_{i=1}^n \left\{ \ell_{t, i}(\langle x_{t, i}, w_{\theta_t, i}(Z_t) \rangle) + \lambda f(w_{\theta_t, i}(Z_t), \theta_t) \right\} + C. \quad (74)$$

In the following, we will explicitly write the expectation  $\mathbb{E}$  in the statement above as

$$\mathbb{E}_{\mu_1, \dots, \mu_T \sim \rho^T} \mathbb{E}_{Z_1 \sim \mu_1^n, \dots, Z_T \sim \mu_T^n}. \quad (75)$$

We now prove [Eq. \(74\)](#). We start from observing that, for any dataset  $Z \sim \mu^n$  and for any  $\theta \in \Theta$  not depending on  $Z$ , recalling the subgradients  $(s'_{\theta,i})_{i=1}^n, s'_{\theta,i} \in \partial \ell_i(\langle x_i, w_{\theta,i}(Z) \rangle)$ , used by [Alg. 2](#) over  $Z$ , we can write

$$\begin{aligned}
\mathbb{E}_{Z \sim \mu^n} [\mathcal{R}_{\theta,\mu}(\bar{w}_\theta(Z))] &\leq \mathbb{E}_{Z \sim \mu^n} \frac{1}{n} \sum_{i=1}^n \mathcal{R}_{\theta,\mu}(w_{\theta,i}(Z)) \\
&= \mathbb{E}_{Z \sim \mu^n} \frac{1}{n} \sum_{i=1}^n \left\{ \ell_i(\langle x_i, w_{\theta,i}(Z) \rangle) + \lambda f(w_{\theta,i}(Z), \theta) \right\} \\
&\leq \mathbb{E}_{Z \sim \mu^n} \left[ \mathcal{L}_Z(\theta) + \frac{1}{2\lambda n} \sum_{i=1}^n \frac{1}{i} \|x_i s'_{\theta,i}\|_{\theta,*}^2 \right] \\
&= \mathbb{E}_{Z \sim \mu^n} \mathcal{L}_Z(\theta) + C.
\end{aligned} \tag{76}$$

In the first inequality above we have applied Jensen's inequality (see [Lemma 15](#) in [App. B](#)) to the convex function  $\mathcal{R}_{\theta,\mu}$ , the first equality holds by standard online-to-batch arguments, more precisely, since  $w_{\theta,i}(Z)$  depends only on the points  $(z_j)_{j=1}^{i-1}$ , thanks to the fact  $Z \sim \mu^n$ , we have

$$\mathbb{E}_{Z \sim \mu^n} \mathcal{R}_{\theta,\mu}(w_{\theta,i}(Z)) = \mathbb{E}_{Z \sim \mu^n} \left[ \ell_i(\langle x_i, w_{\theta,i}(Z) \rangle) + \lambda f(w_{\theta,i}(Z), \theta) \right], \tag{77}$$

and, finally, the last inequality derives from exploiting the non-negativity of  $\Delta_{\text{Dual}}$  and moving the terms in [Eq. \(7\)](#) in [Prop. 2](#). Hence, rewriting  $\mathcal{L}_Z(\theta) = \mathcal{R}_{\theta,Z}(\hat{w}_\theta(Z))$ , we can write the following

$$\begin{aligned}
&\mathbb{E}_{\mu_1, \dots, \mu_T \sim \rho^T} \mathbb{E}_{Z_1 \sim \mu_1^n, \dots, Z_T \sim \mu_T^n} \mathbb{E}_{\mu \sim \rho} \mathbb{E}_{Z \sim \mu^n} \mathcal{R}_{\bar{\theta},\mu}(\bar{w}_{\bar{\theta}}(Z)) \\
&\leq \mathbb{E}_{\mu_1, \dots, \mu_T \sim \rho^T} \mathbb{E}_{Z_1 \sim \mu_1^n, \dots, Z_T \sim \mu_T^n} \mathbb{E}_{\mu \sim \rho} \mathbb{E}_{Z \sim \mu^n} \mathcal{R}_{\bar{\theta},Z}(\hat{w}_{\bar{\theta}}(Z)) + C \\
&\leq \mathbb{E}_{\mu_1, \dots, \mu_T \sim \rho^T} \mathbb{E}_{Z_1 \sim \mu_1^n, \dots, Z_T \sim \mu_T^n} \frac{1}{T} \sum_{t=1}^T \mathbb{E}_{\mu \sim \rho} \underbrace{\mathbb{E}_{Z \sim \mu^n} \mathcal{R}_{\theta_t,Z}(\hat{w}_{\theta_t}(Z))}_{\text{}} + C,
\end{aligned} \tag{78}$$

where, in the first inequality we have applied [Eq. \(76\)](#) with  $\theta = \bar{\theta}$  and in the second inequality we have applied Jensen's inequality (see [Lemma 15](#) in [App. B](#)) to the convex function  $\mathbb{E}_{\mu \sim \rho} \mathbb{E}_{Z \sim \mu^n} \mathcal{L}_Z$ . We now observe that, by definition of  $\hat{w}_{\theta_t}(Z)$  and  $w_{\theta_t,\mu}$ , we can write the following

$$\begin{aligned}
\underbrace{\mathbb{E}_{Z \sim \mu^n} \mathcal{R}_{\theta_t,Z}(\hat{w}_{\theta_t}(Z))}_{\text{}} &\leq \mathbb{E}_{Z \sim \mu^n} \mathcal{R}_{\theta_t,Z}(w_{\theta_t,\mu}) = \mathbb{E}_{Z \sim \mu^n} \mathcal{R}_{\theta_t,\mu}(w_{\theta_t,\mu}) \\
&\leq \underbrace{\mathbb{E}_{Z \sim \mu^n} \mathcal{R}_{\theta_t,\mu}(\bar{w}_{\theta_t}(Z))}_{\text{}}.
\end{aligned} \tag{79}$$

Substituting in [Eq. \(78\)](#), we can write the following

$$\begin{aligned}
&\mathbb{E}_{\mu_1, \dots, \mu_T \sim \rho^T} \mathbb{E}_{Z_1 \sim \mu_1^n, \dots, Z_T \sim \mu_T^n} \mathbb{E}_{\mu \sim \rho} \mathbb{E}_{Z \sim \mu^n} \mathcal{R}_{\bar{\theta},\mu}(\bar{w}_{\bar{\theta}}(Z)) \\
&\leq \mathbb{E}_{\mu_1, \dots, \mu_T \sim \rho^T} \mathbb{E}_{Z_1 \sim \mu_1^n, \dots, Z_T \sim \mu_T^n} \frac{1}{T} \sum_{t=1}^T \mathbb{E}_{\mu \sim \rho} \underbrace{\mathbb{E}_{Z \sim \mu^n} \mathcal{R}_{\theta_t,Z}(\hat{w}_{\theta_t}(Z))}_{\text{}} + C \\
&\leq \mathbb{E}_{\mu_1, \dots, \mu_T \sim \rho^T} \mathbb{E}_{Z_1 \sim \mu_1^n, \dots, Z_T \sim \mu_T^n} \frac{1}{T} \sum_{t=1}^T \mathbb{E}_{\mu \sim \rho} \underbrace{\mathbb{E}_{Z \sim \mu^n} \mathcal{R}_{\theta_t,\mu}(\bar{w}_{\theta_t}(Z))}_{\text{}} + C \\
&= \frac{1}{T} \sum_{t=1}^T \mathbb{E}_{\mu_1, \dots, \mu_{t-1} \sim \rho^{t-1}} \mathbb{E}_{Z_1 \sim \mu_1^n, \dots, Z_{t-1} \sim \mu_{t-1}^n} \mathbb{E}_{\mu_t \sim \rho} \mathbb{E}_{Z_t \sim \mu_t^n} \mathcal{R}_{\theta_t,\mu_t}(\bar{w}_{\theta_t}(Z_t)) + C \\
&\leq \frac{1}{T} \sum_{t=1}^T \mathbb{E}_{\mu_1, \dots, \mu_{t-1} \sim \rho^{t-1}} \mathbb{E}_{Z_1 \sim \mu_1^n, \dots, Z_{t-1} \sim \mu_{t-1}^n} \mathbb{E}_{\mu_t \sim \rho} \mathbb{E}_{Z_t \sim \mu_t^n} \frac{1}{n} \sum_{i=1}^n \mathcal{R}_{\theta_t,\mu_t}(w_{\theta_t,i}(Z_t)) + C \\
&= \mathbb{E}_{\mu_1, \dots, \mu_T \sim \rho^T} \mathbb{E}_{Z_1 \sim \mu_1^n, \dots, Z_T \sim \mu_T^n} \frac{1}{T} \sum_{t=1}^T \frac{1}{n} \sum_{i=1}^n \left\{ \ell_{t,i}(\langle x_{t,i}, w_{\theta_t,i}(Z_t) \rangle) + \lambda f(w_{\theta_t,i}(Z_t), \theta_t) \right\} + C
\end{aligned}$$



where, in the first equality we have exploited the fact that  $\theta_t$  depends only on  $(Z_j)_{j=1}^{t-1}$  and the i.i.d. sampling of the datasets, in the third inequality we have applied Jensen's inequality (see [Lemma 15](#) in [App. B](#)) to the convex function  $\mathcal{R}_{\theta_t, \mu_t}$  and, finally, in the second equality we have exploited the fact that  $w_{\theta_t, i}(Z_t)$  depends only on the points  $(z_{t, j})_{j=1}^{i-1}$  and, consequently, thanks to the fact  $Z_t \sim \mu_t^n$ , as already observed in [Eq. \(77\)](#),

$$\mathbb{E}_{Z_t \sim \mu_t^n} \mathcal{R}_{\theta_t, \mu_t}(w_{\theta_t, i}(Z_t)) = \mathbb{E}_{Z_t \sim \mu_t^n} \left[ \ell_{t, i}(\langle x_{t, i}, w_{\theta_t, i}(Z_t) \rangle) + \lambda f(w_{\theta_t, i}(Z_t), \theta_t) \right]. \quad (80)$$

This coincides with the desired statement in [Eq. \(74\)](#).  $\blacksquare$

The above result in [Prop. 35](#) is a different version of [[1](#), Thm. 6.1] and [[3](#), Thm. 3.3], where the authors give statistical guarantees for the meta-parameter defined by sampling uniformly from the whole pool of the meta-parameters  $(\theta_t)_{t=1}^T$  returned by their method. Their result is consequently in expectation w.r.t. the data and w.r.t. this uniform sampling. On the contrary, in our case, leveraging on the convexity of our meta-objectives and the fact that we derived a *regularized* cumulative error bound for the inner algorithm (see [Prop. 2](#)), we have been able to obtain statistical guarantees for the average of the meta-parameters, without adding randomness and without the need of memorizing the previous meta-parameters. We now are ready to prove [Thm. 5](#).

**Theorem 5** (Transfer risk bound). *Let the same assumptions in [Thm. 4](#) hold in the i.i.d. statistical setting. Then, introducing the regularized transfer risk of the average  $\bar{w}_{\bar{\theta}}$  of the iterates resulting from the combination of [Alg. 2](#) and [Alg. 3](#),*

$$\mathcal{E}_{\text{stat}}^{\text{reg}}(\bar{w}_{\bar{\theta}}) = \mathbb{E}_{\mu \sim \rho} \mathbb{E}_{Z \sim \mu^n} \left[ \mathcal{R}_{\mu}(\bar{w}_{\bar{\theta}}(Z)) + \lambda f(\bar{w}_{\bar{\theta}}(Z), \bar{\theta}) \right],$$

for any  $\theta \in \Theta$  such that  $\mathbb{E}_{\mu \sim \rho} f(w_{\mu}, \theta) < +\infty$ , the following upper bound holds in expectation w.r.t. the sampling of the datasets  $(Z_t)_{t=1}^T$

$$\begin{aligned} \mathbb{E} \mathcal{E}_{\text{stat}}^{\text{reg}}(\bar{w}_{\bar{\theta}}) &\leq \mathcal{E}_{\rho} + \lambda \mathbb{E}_{\mu \sim \rho} f(w_{\mu}, \theta) + \frac{1}{2\lambda n T} \mathbb{E} \sum_{t=1}^T \sum_{i=1}^n \frac{1}{i} \|x_{t, i} s'_{\theta_t, i}\|_{\theta_t, *}^2 \\ &\quad + \frac{\eta F(\theta)}{T} + \frac{1}{2\eta T} \mathbb{E} \sum_{t=1}^T \|\nabla'_{\theta_t}\|_*^2 + \mathbb{E} \mathbb{E}_{\mu \sim \rho} \mathbb{E}_{Z \sim \mu^n} \frac{1}{2\lambda n} \sum_{i=1}^n \frac{1}{i} \|x_i s'_{\bar{\theta}, i}\|_{\bar{\theta}, *}^2. \end{aligned}$$

**Proof.** The desired statement derives from combining [Prop. 35](#) with the regularized cumulative error bound in [Thm. 4](#) with  $\hat{w}_t = w_{\mu_t}$  for any  $t \in \{1, \dots, T\}$  and observing that, thanks to the definition of the vectors  $\hat{w}_t$  and the i.i.d. sampling of the datasets, we can write

$$\begin{aligned} \mathbb{E}_{\mu_1, \dots, \mu_T \sim \rho^T} \mathbb{E}_{Z_1 \sim \mu_1^n, \dots, Z_T \sim \mu_T^n} \frac{1}{T} \sum_{t=1}^T f(\hat{w}_t, \theta) &= \mathbb{E}_{\mu_1, \dots, \mu_T \sim \rho^T} \frac{1}{T} \sum_{t=1}^T f(w_{\mu_t}, \theta) \\ &= \mathbb{E}_{\mu \sim \rho} f(w_{\mu}, \theta) \end{aligned} \quad (81)$$

$$\begin{aligned} \mathbb{E}_{\mu_1, \dots, \mu_T \sim \rho^T} \mathbb{E}_{Z_1 \sim \mu_1^n, \dots, Z_T \sim \mu_T^n} \frac{1}{T} \sum_{t=1}^T \mathcal{R}_{Z_t}(\hat{w}_t) &= \frac{1}{T} \sum_{t=1}^T \mathbb{E}_{\mu_t \sim \rho} \mathbb{E}_{Z_t \sim \mu_t^n} \mathcal{R}_{Z_t}(w_{\mu_t}) \\ &= \mathbb{E}_{\mu \sim \rho} \mathbb{E}_{Z \sim \mu^n} \mathcal{R}_Z(w_{\mu}) \\ &= \mathbb{E}_{\mu \sim \rho} \mathcal{R}_{\mu}(w_{\mu}) \end{aligned} \quad (82)$$

where, in the last equality we have used the fact that  $Z \sim \mu$  and the independence of  $w_{\mu}$  on the data  $Z$ .  $\blacksquare$

## F Fixed parameter in hindsight

In this section we report the results regarding the application of [Alg. 2](#) with an appropriate meta-parameter fixed in hindsight for any task. In [App. F.1](#) we will focus on the non-statistical setting, while in [App. F.2](#) we will consider the statistical setting. These results will be used as benchmark to evaluate the quality of the meta-parameters estimated by our OWO Meta-Learning procedure.

## F.1 Non-statistical setting

In the next result we give a (regularized) cumulative error bound for the iterates generated by the application of [Alg. 2](#) with an appropriate meta-parameter fixed in hindsight for any tasks. Such a bound will be compared to the corresponding bound we have obtained in [Thm. 4](#) for our Meta-Learning procedure.

**Theorem 36** (Cumulative error bound with fixed meta-parameter in hindsight). *Let [Asm. 1](#) hold. Consider a sequence of vectors  $(\hat{w}_t)_{t=1}^T$  in  $\mathbb{R}^d$  and any  $\theta \in \Theta$  such that  $f(\hat{w}_t, \theta) < +\infty$  for any  $t \in \{1, \dots, T\}$ . Let  $(w_{t,i})_{i=1}^n$  be the iterates generated by [Alg. 2](#) with a meta-parameter  $\theta$  as above over the dataset  $Z_t$ , by means of the subgradients  $(s'_{t,i})_{i=1}^n$ , with  $s'_{t,i} \in \partial \ell_{t,i}(\langle x_{t,i}, w_{t,i} \rangle)$ . Then, the following upper bound holds*

$$\sum_{t=1}^T \mathcal{E}_{\text{inner}}^{\text{reg}}(Z_t, \theta) \leq nT \left( \frac{1}{T} \sum_{t=1}^T \mathcal{R}_{Z_t}(\hat{w}_t) + \frac{\lambda}{T} \sum_{t=1}^T f(\hat{w}_t, \theta) + \frac{1}{2\lambda n T} \sum_{t=1}^T \sum_{i=1}^n \frac{1}{i} \|x_{t,i} s'_{t,i}\|_{\theta,*}^2 \right). \quad (83)$$

**Proof.** We start from observing that, according to [Prop. 2](#), since  $\Delta_{\text{Dual}} \geq 0$ , by definition of  $\mathcal{L}_t$  as minimum, we can write

$$\mathcal{E}_{\text{inner}}^{\text{reg}}(Z_t, \theta) \leq n \left( \mathcal{R}_{Z_t}(\hat{w}_t) + \lambda f(\hat{w}_t, \theta) + \frac{1}{2\lambda n} \sum_{i=1}^n \frac{1}{i} \|x_{t,i} s'_{t,i}\|_{\theta,*}^2 \right). \quad (84)$$

The statement directly derives from summing over the datasets the above bound.  $\blacksquare$

We observe that the bound for our method in [Thm. 4](#) is composed by two main parts: one part (the first row) is similar to the benchmark bound in [Eq. \(83\)](#), the other part (the second row) can be considered as the additional effort due to the estimation of the meta-parameter from the data. As we will see in the following, for the settings in [Ex. 1](#) and [Ex. 2](#), these additional terms can be made vanishing in the number of tasks  $T$ , by choosing in an appropriate way the hyper-parameter  $\eta$ .

## F.2 Statistical setting

In the next result we give a (regularized) transfer risk bound for the average of the iterates generated by the application of [Alg. 2](#) with an appropriate meta-parameter fixed in hindsight for any tasks. Such a bound will be compared to the corresponding bound we have obtained in [Thm. 5](#) for our Meta-Learning procedure.

**Theorem 37** (Transfer risk bound with fixed meta-parameter in hindsight). *Let [Asm. 1](#) hold. Consider in the i.i.d. statistical setting any  $\theta \in \Theta$  such that  $\mathbb{E}_{\mu \sim \rho} f(w_\mu, \theta) < +\infty$ . Let  $\bar{w}_\theta$  be the average of the iterates  $(w_{\theta,i})_{i=1}^n$  generated by [Alg. 2](#) with a meta-parameter  $\theta$  as above over the dataset  $Z$ , by means of the subgradients  $(s'_{\theta,i})_{i=1}^n$ , with  $s'_{\theta,i} \in \partial \ell_{\theta,i}(\langle x_{\theta,i}, w_{\theta,i} \rangle)$ . Then, the following upper bound holds*

$$\mathcal{E}_{\text{stat}}^{\text{reg}}(\bar{w}_\theta) \leq \mathcal{E}_\rho + \lambda \mathbb{E}_{\mu \sim \rho} f(w_\mu, \theta) + \frac{1}{2\lambda n} \mathbb{E}_{\mu \sim \rho} \mathbb{E}_{Z \sim \mu^n} \sum_{i=1}^n \frac{1}{i} \|x_i s'_{\theta,i}\|_{\theta,*}^2. \quad (85)$$

**Proof.** We start from observing that, according to [Prop. 2](#), since  $\Delta_{\text{Dual}} \geq 0$ , by definition of  $\mathcal{L}_Z$  as minimum, we can write

$$\begin{aligned} \frac{1}{n} \mathcal{E}_{\text{inner}}^{\text{reg}}(Z, \theta) &= \frac{1}{n} \sum_{i=1}^n \left\{ \ell_i(\langle x_i, w_{\theta,i} \rangle) + \lambda f(w_{\theta,i}, \theta) \right\} \\ &\leq \mathcal{R}_Z(w_\mu) + \lambda f(w_\mu, \theta) + \frac{1}{2\lambda n} \sum_{i=1}^n \frac{1}{i} \|x_i s'_{\theta,i}\|_{\theta,*}^2. \end{aligned} \quad (86)$$

Taking the expectation of the above bound w.r.t.  $\mu \sim \rho$  and  $Z \sim \mu^n$ , recalling that, as already observed in [Eq. \(76\)](#),

$$\mathbb{E}_{Z \sim \mu^n} [\mathcal{R}_{\theta,\mu}(\bar{w}_\theta)] \leq \mathbb{E}_{Z \sim \mu^n} \frac{1}{n} \sum_{i=1}^n \left\{ \ell_i(\langle x_i, w_{\theta,i} \rangle) + \lambda f(w_{\theta,i}, \theta) \right\} \quad (87)$$

and recalling that  $\mathbb{E}_{Z \sim \mu^n} \mathcal{R}_Z(w_\mu) = \mathcal{R}_\mu(w_\mu)$ , we obtain the desired statement.  $\blacksquare$

**Algorithm 5** Within-task algorithm for [Ex. 1](#)


---

**Input**  $\lambda > 0, \theta \in \mathbb{R}^d, Z = (z_i)_{i=1}^n$   
**Initialization**  $s_{\theta,1} = (), w_{\theta,1} = \theta$   
**For**  $i = 1$  to  $n$   
  Receive the datapoint  $z_i = (x_i, y_i)$   
  Compute  $s'_{\theta,i} \in \partial \ell_i(\langle x_i, w_{\theta,i} \rangle) \subseteq \mathbb{R}$   
  Define  $(s_{\theta,i+1})_i = s'_{\theta,i}, \gamma_i = \lambda(i+1)$   
  Define  $p_{\theta,i} = x_i s'_{\theta,i} + \lambda(w_{\theta,i} - \theta)$   
  Update  $w_{\theta,i+1} = w_{\theta,i} - 1/\gamma_i p_{\theta,i}$   
**Return**  $(w_{\theta,i})_{i=1}^{n+1}, \bar{w}_\theta = \frac{1}{n} \sum_{i=1}^n w_{\theta,i}, s_{\theta,n+1}$

---

**Algorithm 6** Meta-algorithm for [Ex. 1](#)


---

**Input**  $\eta > 0, (Z_t)_{t=1}^T$   
**Initialization**  $\theta_1 = 0$   
**For**  $t = 1$  to  $T$   
  Receive incrementally the dataset  $Z_t$   
  Run [Alg. 5](#) with  $\theta_t$  over  $Z_t$   
  Compute  $s_{\theta_t,n+1}$   
  Define  $\nabla'_{\theta_t} = X_t^\top s_{\theta_t,n+1}/n$   
  Update  $\theta_{t+1} = \theta_t - \nabla'_{\theta_t}/\eta$   
**Return**  $(\theta_t)_{t=1}^{T+1}, \bar{\theta} = \frac{1}{T} \sum_{t=1}^T \theta_t$

---

Looking at the bound in [Thm. 5](#) for our method and the benchmark performance in [Eq. \(85\)](#), the conclusions and the comments we can derive are an adaptation to the statistical setting of the comments we have given above for the performance of our method in the non-statistical setting.

## G Specializing to the bias in [Ex. 1](#)

In this chapter we specify our Meta-Learning framework to the setting in [Ex. 1](#). We recall that, in such a case, the meta-parameter coincides with a bias vector  $\theta \in \mathbb{R}^d$  and, as we will see in the following, the tasks' similarity translates into the existence of a bias vector closed to the tasks' target vectors. We start this chapter by specializing in [App. G.1](#) our general OWO method to [Ex. 1](#), deriving the corresponding inner and meta-algorithm. The method is then analyzed in [App. G.2](#) and [App. G.3](#), where we consider the non-statistical setting and the statistical setting, respectively. Finally, in [App. G.4](#), we discuss the results.

### G.1 Deriving the method for [Ex. 1](#)

We start from specializing the generic inner algorithm in [Alg. 2](#) and the generic meta-algorithm in [Alg. 3](#) to the setting outlined in [Ex. 1](#). The algorithms we obtain are reported in [Alg. 5](#) and [Alg. 6](#), respectively, where,  $X_t \in \mathbb{R}^{n \times d}$  denotes the input vectors' matrix of the task  $t$ , having as  $i$ -th row the input vector  $x_{t,i}$ . The deduction is reported in [Lemma 38](#) and [Lemma 39](#) below, respectively.

We start from the deduction of the inner algorithm in [Alg. 5](#).

**Lemma 38** (Derivation of the inner [Alg. 5](#), bias). *For any  $i \in \{0, \dots, n\}$ , let  $w_{\theta,i+1}$  be the update of the (primal) variable deriving from applying [Alg. 2](#) to the dataset  $Z = (x_i, y_i)_{i=1}^n$  in the setting outlined in [Ex. 1](#) with bias  $\theta \in \mathbb{R}^d$ . Let  $s'_{\theta,i} \in \partial \ell_i(\langle x_i, w_{\theta,i} \rangle)$  be the subgradient used by such an algorithm to compute  $w_{\theta,i+1}$ . Then,  $w_{\theta,1} = \theta$  and, for any  $i \in \{1, \dots, n\}$ , introducing the subgradient of the regularized loss*

$$p_{\theta,i} = x_i s'_{\theta,i} + \lambda(w_{\theta,i} - \theta) \in \partial \left( \ell_i(\langle x_i, \cdot \rangle) + \frac{\lambda}{2} \|\cdot - \theta\|_2^2 \right) (w_{\theta,i}), \quad (88)$$

we have

$$w_{\theta,i+1} = w_{\theta,i} - \frac{1}{\lambda(i+1)} p_{\theta,i}. \quad (89)$$

**Proof.** We start from observing that, according to the choices made in [Ex. 1](#), for any  $\theta, w, u \in \mathbb{R}^d$ , we have

$$f(w, \theta) = \frac{1}{2} \|w - \theta\|_2^2 \quad f(\cdot, \theta)^*(u) = \frac{1}{2} \|u\|_2^2 + \langle u, \theta \rangle \quad \nabla f(\cdot, \theta)^*(u) = u + \theta.$$

Consequently, according to the definition of  $w_{\theta,1}$  in [Alg. 2](#), we have

$$w_{\theta,1} = \nabla f(\cdot, \theta)^*(0) = \theta. \quad (90)$$

We now show the desired closed form of  $w_{\theta,i+1}$  for any  $i \in \{1, \dots, n\}$ . In such a case, denoting by  $X_{1:i} \in \mathbb{R}^{i \times d}$  the matrix containing the first  $i$  input vectors as rows, by definition of  $w_{\theta,i+1}$  in [Alg. 2](#), we can write

$$w_{\theta,i+1} = \nabla f(\cdot, \theta)^* \left( -\frac{1}{\lambda(i+1)} X_{1:i}^\top s_{\theta,i+1} \right) = -\frac{1}{\lambda(i+1)} X_{1:i}^\top s_{\theta,i+1} + \theta. \quad (91)$$

For  $i = 1$  the statement holds, as a matter of fact, since  $w_{\theta,1} = \theta$ , exploiting [Eq. \(91\)](#) and introducing the subgradient  $p_{\theta,1} = x_1 s'_{\theta,1} + \lambda(w_{\theta,1} - \theta) = x_1 s'_{\theta,1}$ , we can write

$$w_{\theta,2} = -\frac{1}{2\lambda} x_1 s'_{\theta,1} + \theta = w_{\theta,1} - \frac{1}{2\lambda} p_{\theta,1}. \quad (92)$$

Now, we show that the statement holds also for  $i \in \{2, \dots, n\}$ . Since  $X_{1:i}^\top s_{\theta,i+1} = X_{1:i-1}^\top s_{\theta,i} + x_i s'_{\theta,i}$ , we can write the following

$$\begin{aligned} w_{\theta,i+1} &= -\frac{1}{\lambda(i+1)} X_{1:i}^\top s_{\theta,i+1} + \theta = -\frac{1}{\lambda(i+1)} \left( X_{1:i-1}^\top s_{\theta,i} + x_i s'_{\theta,i} \right) + \theta \\ &= \frac{\lambda i}{\lambda(i+1)} \left( -\frac{1}{\lambda i} X_{1:i-1}^\top s_{\theta,i} \right) - \frac{x_i s'_{\theta,i}}{\lambda(i+1)} + \theta \\ &= \frac{\lambda(i+1)(w_{\theta,i} - \theta) - x_i s'_{\theta,i} - \lambda(w_{\theta,i} - \theta)}{\lambda(i+1)} + \theta \\ &= \frac{\lambda(i+1)w_{\theta,i} - p_{\theta,i}}{\lambda(i+1)} = w_{\theta,i} - \frac{1}{\lambda(i+1)} p_{\theta,i}, \end{aligned} \quad (93)$$

where, in the first and the fourth equality, we have exploited [Eq. \(91\)](#) and in the fifth equality we have exploited the form of the subgradient  $p_{\theta,i} = x_i s'_{\theta,i} + \lambda(w_{\theta,i} - \theta)$ . ■

We now proceed with the deduction of the meta-algorithm in [Alg. 6](#).

**Lemma 39** (Derivation of the meta-algorithm in [Alg. 6](#), bias). *For any  $t \in \{0, \dots, T\}$ , let  $\theta_{t+1}$  be the update of the variable deriving from applying [Alg. 3](#) to the data  $(Z_t)_{t=1}^T$  in the setting outlined in [Ex. 1](#). Let  $\nabla'_{\theta_t}$  be the approximated meta-subgradient computed as described in [Prop. 3](#) and used by the algorithm to compute  $\theta_{t+1}$ . Then,  $\theta_1 = 0 \in \mathbb{R}^d$  and, for any  $t \in \{1, \dots, T\}$ , we have*

$$\theta_{t+1} = \theta_t - \frac{1}{\eta} \nabla'_{\theta_t}. \quad (94)$$

Moreover, for any  $t \in \{1, \dots, T\}$ , we have

$$\nabla'_{\theta_t} = \frac{1}{n} X_t^\top s_{\theta_t, n+1}, \quad (95)$$

where  $s_{\theta_t, n+1} \in \mathbb{R}^n$  is the output of [Alg. 6](#) with bias vector  $\theta_t$  over the dataset  $Z_t$  and, under [Asm. 3](#),

$$\|\nabla'_{\theta_t}\|_2^2 \leq L^2 \|C_t\|_\infty. \quad (96)$$

**Proof.** We start from observing that, according to the choices made in [Ex. 1](#), for any  $k, \theta, u \in \mathbb{R}^d$ , we have

$$F(\theta) = \frac{1}{2} \|\theta\|_2^2 \quad F^*(k) = \frac{1}{2} \|k\|_2^2 \quad \nabla F^*(k) = k \quad f(\cdot, \theta)^*(u) = \frac{1}{2} \|u\|_2^2 + \langle u, \theta \rangle.$$

Consequently, according to the definition of  $\theta_1$  in [Alg. 3](#), we have

$$\theta_1 = \nabla F^*(0) = 0. \quad (97)$$

We now show the desired closed form of  $\theta_{t+1}$ , for any  $t \in \{1, \dots, T\}$ . In such a case, by the definition of  $\theta_{t+1}$  in [Alg. 3](#), we can write

$$\theta_{t+1} = \nabla F^* \left( -\frac{1}{\eta} \sum_{j=1}^t \nabla'_{\theta_j} \right) = -\frac{1}{\eta} \sum_{j=1}^t \nabla'_{\theta_j}. \quad (98)$$

For  $t = 1$  the statement holds, as a matter of fact, since  $\theta_1 = 0$ , exploiting [Eq. \(98\)](#), we can write

$$\theta_2 = -\frac{1}{\eta} \nabla'_{\theta_1} = \theta_1 - \frac{1}{\eta} \nabla'_{\theta_1}. \quad (99)$$

For  $t \in \{2, \dots, T\}$ , we observe that, according to [Eq. \(98\)](#), we have

$$\theta_{t+1} = -\frac{1}{\eta} \sum_{j=1}^t \nabla'_{\theta_j} = -\frac{1}{\eta} \sum_{j=1}^{t-1} \nabla'_{\theta_j} - \frac{1}{\eta} \nabla'_{\theta_t} = \theta_t - \frac{1}{\eta} \nabla'_{\theta_t}. \quad (100)$$

We now specify the closed form of the approximated meta-subgradients, computed as described in [Prop. 3](#) for [Ex. 1](#). We start from observing that adding to the notation in [Prop. 3](#) the further task index  $t$ , by strong duality (see [Lemma 34](#)), we can rewrite

$$\mathcal{L}_t(\theta) = \max_{s \in \mathbb{R}^n} \tilde{D}_{t,n+1}(s, \theta) \quad \tilde{D}_{t,n+1}(s, \theta) = -\frac{1}{n} D_{t,n+1}(s, \theta) \quad (101)$$

where, according to [Eq. \(8\)](#), in the setting outlined in [Ex. 1](#),

$$\begin{aligned} -D_{t,n+1}(s, \theta) &= -\sum_{i=1}^n \ell_{t,i}^*(s_i) - \lambda n f(\cdot, \theta)^* \left( -\frac{1}{\lambda n} \sum_{i=1}^n x_{t,i} s_i \right) \\ &= -\sum_{i=1}^n \ell_{t,i}^*(s_i) - \lambda n f(\cdot, \theta)^* \left( -\frac{1}{\lambda n} X_t^\top s \right) \\ &= -\sum_{i=1}^n \ell_{t,i}^*(s_i) - \frac{1}{2\lambda n} \|X_t^\top s\|_2^2 + \langle X_t^\top s, \theta \rangle. \end{aligned} \quad (102)$$

Consequently, recalling that the output  $s_{\theta_t, n+1}$  of the inner algorithm coincides with the last iterate of the corresponding dual inner iteration, according to [Prop. 3](#), we have

$$\nabla_{\theta_t} = X_t^\top s_{\theta_t, n+1} \quad (103)$$

and, consequently,

$$\nabla'_{\theta_t} = \nabla_{\theta_t} / n \in \partial_{\epsilon_{\theta_t}/n} \mathcal{L}_t(\theta_t), \quad (104)$$

where  $\epsilon_{\theta_t}$  is outlined in [Prop. 3](#) and it must be specified to [Ex. 1](#). In order to prove [Eq. \(96\)](#), we start from observing that  $s_{\theta_t, n+1}$  is the vector in  $\mathbb{R}^n$  having as component  $i$  the subgradient  $s'_{\theta_t, i} \in \partial \ell_{t,i}(\langle x_{t,i}, w_{\theta_t, i} \rangle)$ . Hence, under [Asm. 3](#), exploiting [Lemma 25](#) in [App. B](#), any component of  $s_{\theta_t, n+1}$  is absolutely bounded by  $L$ , and, consequently,  $\|s_{\theta_t, n+1}\|_2 \leq L\sqrt{n}$ . This allows us to get the desired bound by applying Holder's inequality (see [Lemma 8](#) in [App. B](#)) to the matrices' scalar product as follows

$$\begin{aligned} \|\nabla'_{\theta_t}\|_2^2 &= \frac{1}{n} \text{Tr} \left( \frac{1}{n} \sum_{i=1}^n x_{t,i} x_{t,i}^\top s_{\theta_t, n+1} s_{\theta_t, n+1}^\top \right) \leq \frac{1}{n} \left\| \frac{1}{n} \sum_{i=1}^n x_{t,i} x_{t,i}^\top \right\|_\infty \|s_{\theta_t, n+1}\|_2^2 \\ &\leq L^2 \left\| \frac{1}{n} \sum_{i=1}^n x_{t,i} x_{t,i}^\top \right\|_\infty = L^2 \|C_t\|_\infty, \end{aligned}$$

where in the last equality we have introduced the definition of  $C_t$ . ■

We observe that the inner [Alg. 5](#) we have deduced is a slightly different version of the inner algorithm used in [\[11\]](#) in the statistical setting, where the step size decreases as  $1/(\lambda i)$  instead of  $1/(\lambda(i+1))$ . Instead, the meta-algorithm in [Alg. 6](#) we have retrieved is exactly the same analyzed in that work. We refer to the discussion in [App. A](#) for more details about that work.

We also observe that for the setting in [Ex. 1](#), our method in [Alg. 5](#) and [Alg. 6](#) scales linearly with the dimension of the input space. Thus, it will be appropriate also for datasets in more rich observation spaces, such as [\[41\]](#).

In the next section, we analyze the performance of our OWO Meta-Learning method applied to [Ex. 1](#), in the non-statistical setting.



## G.2 Analysis of the method in the non-statistical setting for Ex. 1

In the next result we specify [Thm. 4](#) to [Ex. 1](#), that is, we provide a (regularized) cumulative error bound for the procedure deriving from combining [Alg. 5](#) with [Alg. 6](#).

**Corollary 40** (Cumulative error bound, bias). *Let [Asm. 3](#) hold and consider the setting in [Thm. 4](#) applied to [Ex. 1](#). Then, introducing the empirical variance of the vectors  $(\hat{w}_t)_{t=1}^T$  w.r.t. a bias vector  $\theta \in \mathbb{R}^d$*

$$\hat{V}(\theta) = \frac{1}{2T} \sum_{t=1}^T \|\hat{w}_t - \theta\|_2^2, \quad (105)$$

the following (regularized) cumulative error bound holds for any  $\theta \in \mathbb{R}^d$

$$\mathcal{E}_{\text{meta}}^{\text{reg}}((Z_t)_{t=1}^T) \leq nT \left( \frac{1}{T} \sum_{t=1}^T \mathcal{R}_{Z_t}(\hat{w}_t) + \lambda \hat{V}(\theta) + \frac{L^2 \text{Tr}(\hat{C}^{\text{tot}})}{2\lambda n} + \frac{\eta \|\theta\|_2^2}{2T} + \frac{L^2 \|C^{\text{tot}}\|_{\infty,1}}{2\eta} \right). \quad (106)$$

Hence, optimizing w.r.t. the hyper-parameters  $\lambda$  and  $\eta$ , for

$$\lambda = L \sqrt{\frac{\text{Tr}(\hat{C}^{\text{tot}})}{2n\hat{V}(\theta)}} \quad \eta = \frac{L \sqrt{T \|C^{\text{tot}}\|_{\infty,1}}}{\|\theta\|_2}, \quad (107)$$

we get

$$\mathcal{E}_{\text{meta}}^{\text{reg}}((Z_t)_{t=1}^T) \leq nT \left( \frac{1}{T} \sum_{t=1}^T \mathcal{R}_{Z_t}(\hat{w}_t) + L \left( \sqrt{\frac{2\hat{V}(\theta) \text{Tr}(\hat{C}^{\text{tot}})}{n}} + \|\theta\|_2 \sqrt{\frac{\|C^{\text{tot}}\|_{\infty,1}}{T}} \right) \right).$$

**Proof.** Specializing [Thm. 4](#) to the quantities outlined in [Ex. 1](#), exploiting the bound on the norm of the approximated meta-subgradients given in [Eq. \(96\)](#) (exploiting [Asm. 3](#)) and using the notation in [Eq. \(105\)](#), for any  $\theta \in \mathbb{R}^d$ , we get

$$\begin{aligned} \mathcal{E}_{\text{meta}}^{\text{reg}}((Z_t)_{t=1}^T) &\leq nT \left( \frac{1}{T} \sum_{t=1}^T \mathcal{R}_{Z_t}(\hat{w}_t) + \lambda \hat{V}(\theta) + \frac{1}{2\lambda nT} \sum_{t=1}^T \sum_{i=1}^n \frac{1}{i} \|x_{t,i} s'_{\theta_{t,i}}\|_2^2 \right. \\ &\quad \left. + \frac{\eta \|\theta\|_2^2}{2T} + \frac{L^2 \|C^{\text{tot}}\|_{\infty,1}}{2\eta} \right). \end{aligned} \quad (108)$$

The statement derives from the above inequality observing that, under [Asm. 3](#), using the definition of  $\hat{C}^{\text{tot}}$ , we can write

$$\frac{1}{T} \sum_{t=1}^T \sum_{i=1}^n \frac{1}{i} \|x_{t,i} s'_{\theta_{t,i}}\|_2^2 \leq L^2 \text{Tr} \left( \frac{1}{T} \sum_{t=1}^T \sum_{i=1}^n \frac{1}{i} x_{t,i} x_{t,i}^\top \right) = L^2 \text{Tr}(\hat{C}^{\text{tot}}). \quad (109)$$

■

In order to evaluate the quality of the bound above, we specify [Thm. 36](#) to [Ex. 1](#), that is, we provide a (regularized) cumulative error bound for the procedure deriving from running the within-task [Alg. 5](#) with a bias vector fixed in hindsight for any task.

**Corollary 41** (Cumulative error bound with fixed meta-parameter in hindsight, bias). *Let [Asm. 3](#) hold and consider the setting in [Thm. 36](#) applied to [Ex. 1](#). Then, according to the notation in [Eq. \(105\)](#), the following (regularized) cumulative error bound holds for any  $\theta \in \mathbb{R}^d$*

$$\sum_{t=1}^T \mathcal{E}_{\text{inner}}^{\text{reg}}(Z_t, \theta) \leq nT \left( \frac{1}{T} \sum_{t=1}^T \mathcal{R}_{Z_t}(\hat{w}_t) + \lambda \hat{V}(\theta) + \frac{L^2 \text{Tr}(\hat{C}^{\text{tot}})}{2\lambda n} \right). \quad (110)$$

Hence, optimizing w.r.t. the hyper-parameter  $\lambda$ , for

$$\lambda = L \sqrt{\frac{\text{Tr}(\hat{C}^{\text{tot}})}{2n\hat{V}(\theta)}}, \quad (111)$$

we get

$$\sum_{t=1}^T \mathcal{E}_{\text{inner}}^{\text{reg}}(Z_t, \theta) \leq nT \left( \frac{1}{T} \sum_{t=1}^T \mathcal{R}_{Z_t}(\hat{w}_t) + L \sqrt{\frac{2\hat{V}(\theta) \text{Tr}(\hat{C}^{\text{tot}})}{n}} \right). \quad (112)$$

**Proof.** Specializing [Thm. 36](#) to the quantities outlined in [Ex. 1](#), using the notation in [Eq. \(105\)](#), for any  $\theta \in \mathbb{R}^d$ , we get

$$\sum_{t=1}^T \mathcal{E}_{\text{inner}}^{\text{reg}}(Z_t, \theta) \leq nT \left( \frac{1}{T} \sum_{t=1}^T \mathcal{R}_{Z_t}(\hat{w}_t) + \lambda \hat{V}(\theta) + \frac{1}{2\lambda nT} \sum_{t=1}^T \sum_{i=1}^n \frac{1}{i} \|x_{t,i} s'_{t,i}\|_2^2 \right). \quad (113)$$

The statement derives from the above inequality observing that, under [Asm. 3](#), using the definition of  $\hat{C}^{\text{tot}}$ , we can write

$$\frac{1}{T} \sum_{t=1}^T \sum_{i=1}^n \frac{1}{i} \|x_{t,i} s'_{t,i}\|_2^2 \leq L^2 \text{Tr} \left( \frac{1}{T} \sum_{t=1}^T \sum_{i=1}^n \frac{1}{i} x_{t,i} x_{t,i}^\top \right) = L^2 \text{Tr}(\hat{C}^{\text{tot}}). \quad (114)$$

■

We postpone to [App. G.4](#) a discussion about the results we reported above. In the next section, we analyze the performance of our OWO Meta-Learning method applied to [Ex. 1](#), in the statistical setting.

### G.3 Analysis of the method in the statistical setting for [Ex. 1](#)

In the result below we specify [Thm. 5](#) to [Ex. 1](#), that is, we provide a (regularized) transfer risk bound for the average  $\bar{w}_{\bar{\theta}}$  of the estimators returned by the combination of [Alg. 5](#) with [Alg. 6](#).

**Corollary 42** (Transfer risk bound, bias). *Let [Asm. 3](#) hold and consider the statistical setting in [Thm. 5](#) applied to [Ex. 1](#). Then, introducing the exact variance of the vectors  $w_\mu$  w.r.t. a bias vector  $\theta \in \mathbb{R}^d$*

$$V_\rho(\theta) = \frac{1}{2} \mathbb{E}_{\mu \sim \rho} \|w_\mu - \theta\|_2^2, \quad (115)$$

the following (regularized) transfer risk bound holds for any  $\theta \in \mathbb{R}^d$

$$\mathbb{E} \mathcal{E}_{\text{stat}}^{\text{reg}}(\bar{w}_{\bar{\theta}}) \leq \mathcal{E}_\rho + \lambda V_\rho(\theta) + \frac{(\log(n) + 1) L^2 \text{Tr}(C_\rho)}{\lambda n} + \frac{\eta \|\theta\|_2^2}{2T} + \frac{L^2 \mathbb{E} \|C^{\text{tot}}\|_{\infty,1}}{2\eta}. \quad (116)$$

Hence, optimizing w.r.t. the hyper-parameters  $\lambda$  and  $\eta$ , for

$$\lambda = L \sqrt{\frac{(\log(n) + 1) \text{Tr}(C_\rho)}{n V_\rho(\theta)}} \quad \eta = \frac{L \sqrt{T \mathbb{E} \|C^{\text{tot}}\|_{\infty,1}}}{\|\theta\|_2}, \quad (117)$$

we get

$$\mathbb{E} \mathcal{E}_{\text{stat}}^{\text{reg}}(\bar{w}_{\bar{\theta}}) \leq \mathcal{E}_\rho + L \left( 2 \sqrt{\frac{(\log(n) + 1) V_\rho(\theta) \text{Tr}(C_\rho)}{n}} + \|\theta\|_2 \sqrt{\frac{\mathbb{E} \|C^{\text{tot}}\|_{\infty,1}}{T}} \right). \quad (118)$$

**Proof.** Specializing [Thm. 5](#) to the quantities outlined in [Ex. 1](#), exploiting the bound on the norm of the approximated meta-subgradients given in [Eq. \(96\)](#) (exploiting [Asm. 3](#)) and using the notation in [Eq. \(115\)](#), the following bound holds for any  $\theta \in \mathbb{R}^d$

$$\begin{aligned} \mathbb{E} \mathcal{E}_{\text{stat}}^{\text{reg}}(\bar{w}_{\bar{\theta}}) &\leq \mathcal{E}_\rho + \lambda V_\rho(\theta) + \frac{1}{2\lambda nT} \mathbb{E} \sum_{t=1}^T \sum_{i=1}^n \frac{1}{i} \|x_{t,i} s'_{t,i}\|_2^2 \\ &\quad + \frac{\eta \|\theta\|_2^2}{2T} + \frac{L^2 \mathbb{E} \|C^{\text{tot}}\|_{\infty,1}}{2\eta} + \frac{1}{2\lambda n} \mathbb{E}_{\mu \sim \rho} \mathbb{E}_{Z \sim \mu^n} \sum_{i=1}^n \frac{1}{i} \|x_i s'_{\bar{\theta},i}\|_2^2. \end{aligned}$$

The desired statement derives from the above inequality and from observing that, thanks to [Asm. 3](#) and the i.i.d. sampling of the data, using the inequality  $\sum_{i=1}^n 1/i \leq \log(n) + 1$  and the definition of  $C_\rho$ , we have

$$\begin{aligned} \mathbb{E} \frac{1}{T} \sum_{t=1}^T \sum_{i=1}^n \frac{1}{i} \|x_{t,i} s'_{t,i}\|_2^2 &\leq L^2 \mathbb{E} \text{Tr} \left( \frac{1}{T} \sum_{t=1}^T \sum_{i=1}^n \frac{1}{i} x_{t,i} x_{t,i}^\top \right) \leq L^2 (\log(n) + 1) \text{Tr}(C_\rho) \\ \mathbb{E}_{\mu \sim \rho} \mathbb{E}_{Z \sim \mu^n} \sum_{i=1}^n \frac{1}{i} \|x_i s'_{\bar{\theta},i}\|_2^2 &\leq L^2 \mathbb{E}_{\mu \sim \rho} \mathbb{E}_{Z \sim \mu^n} \text{Tr} \left( \sum_{i=1}^n \frac{1}{i} x_i x_i^\top \right) \leq L^2 (\log(n) + 1) \text{Tr}(C_\rho). \end{aligned}$$

■

In order to evaluate the quality of the bound above, we specify [Thm. 37](#) to [Ex. 1](#), that is, we provide a (regularized) transfer risk bound for  $\bar{w}_\theta$ , the average of the iterations returned by running the within-task [Alg. 5](#) with bias vector  $\theta$  fixed in hindsight for any task.

**Corollary 43** (Transfer risk bound with fixed meta-parameter in hindsight, bias). *Let [Asm. 3](#) hold and consider the statistical setting in [Thm. 37](#) applied to [Ex. 1](#). Then, according to the notation in [Eq. \(115\)](#), the following (regularized) transfer risk bound holds for any  $\theta \in \mathbb{R}^d$*

$$\mathcal{E}_{\text{stat}}^{\text{reg}}(\bar{w}_\theta) \leq \mathcal{E}_\rho + \lambda V_\rho(\theta) + \frac{L^2(\log(n) + 1)\text{Tr}(C_\rho)}{2\lambda n}. \quad (119)$$

Hence, optimizing w.r.t. the hyper-parameter  $\lambda$ , for

$$\lambda = L \sqrt{\frac{(\log(n) + 1)\text{Tr}(C_\rho)}{2nV_\rho(\theta)}}, \quad (120)$$

we get

$$\mathcal{E}_{\text{stat}}^{\text{reg}}(\bar{w}_\theta) \leq \mathcal{E}_\rho + L \sqrt{\frac{2(\log(n) + 1)V_\rho(\theta)\text{Tr}(C_\rho)}{n}}. \quad (121)$$

**Proof.** Specializing [Thm. 37](#) to the quantities outlined in [Ex. 1](#), using the notation in [Eq. \(115\)](#), for any  $\theta \in \mathbb{R}^d$ , we get

$$\mathcal{E}_{\text{stat}}^{\text{reg}}(\bar{w}_\theta) \leq \mathcal{E}_\rho + \lambda V_\rho(\theta) + \frac{1}{2\lambda n} \mathbb{E}_{\mu \sim \rho} \mathbb{E}_{Z \sim \mu^n} \sum_{i=1}^n \frac{1}{i} \|x_i s'_{\theta,i}\|_2^2.$$

The statement derives from the above inequality observing that, under [Asm. 3](#), exploiting the i.i.d. sampling of the data and the inequality  $\sum_{i=1}^n 1/i \leq \log(n) + 1$ , introducing the definition of  $C_\rho$ , we can write

$$\mathbb{E}_{\mu \sim \rho} \mathbb{E}_{Z \sim \mu^n} \sum_{i=1}^n \frac{1}{i} \|x_i s'_{\theta,i}\|_2^2 \leq L^2 \mathbb{E}_{\mu \sim \rho} \mathbb{E}_{Z \sim \mu^n} \text{Tr}\left(\sum_{i=1}^n \frac{1}{i} x_i x_i^\top\right) \leq L^2(\log(n) + 1) \text{Tr}(C_\rho).$$

■

Also in this case, the comments to the bounds above are postponed in the following [App. G.4](#).

#### G.4 Discussion of the results for [Ex. 1](#)

We start from discussing the results in [Cor. 41](#) and [Cor. 43](#), where the bias vector used by the inner algorithm is fixed in hindsight for any task.

##### G.4.1 Advantage of selecting the right bias

Looking at the bounds in [Cor. 41](#) and [Cor. 43](#), we can state that the advantage in using one bias vector  $\theta \in \mathbb{R}^d$  in comparison to the others is determined by the associated empirical variance  $\hat{V}(\theta)$  in [Cor. 41](#) or by the corresponding exact variance  $V_\rho(\theta)$  in [Cor. 43](#). This inspires us to consider as the best algorithm in our class (*oracle*) the algorithm associated to the bias vector minimizing the above quantities:

$$\hat{\theta} = \underset{\theta \in \mathbb{R}^d}{\text{argmin}} \hat{V}(\theta) = \frac{1}{T} \sum_{t=1}^T \hat{w}_t, \quad (122)$$

for the non-statistical setting in [Cor. 41](#), and

$$\theta_\rho = \underset{\theta \in \mathbb{R}^d}{\text{argmin}} V_\rho(\theta) = \mathbb{E}_{\mu \sim \rho} w_\mu, \quad (123)$$

for the statistical setting in [Cor. 43](#). In the following, we will consider these two reasonable vectors as benchmark in order to evaluate the quality of the bias returned by our Meta-Learning procedure.

On the other hand, solving the tasks independently (ITL), in this case, corresponds to the unbiased case, i.e. to the application of the inner [Alg. 5](#) with bias  $\theta_{\text{ITL}} = 0 \in \mathbb{R}^d$  for any task. In particular,

from the above bounds, we can say that there is an advantage in using the optimal bias w.r.t. solving each task independently, when the tasks are *similar* in the sense that the variance of the associated target vectors is much smaller than their second moment, i.e. when

$$\hat{V}(\hat{\theta}) = \min_{\theta \in \mathbb{R}^d} \frac{1}{2T} \sum_{t=1}^T \|\hat{w}_t - \theta\|_2^2 = \frac{1}{2T} \sum_{t=1}^T \|\hat{w}_t - \hat{\theta}\|_2^2 \ll \frac{1}{2T} \sum_{t=1}^T \|\hat{w}_t\|_2^2 = \hat{V}(0) \quad (124)$$

for the non-statistical setting and

$$V_\rho(\theta_\rho) = \min_{\theta \in \mathbb{R}^d} \mathbb{E}_{\mu \sim \rho} \frac{1}{2} \|w_\mu - \theta\|_2^2 = \mathbb{E}_{\mu \sim \rho} \frac{1}{2} \|w_\mu - \theta_\rho\|_2^2 \ll \mathbb{E}_{\mu \sim \rho} \frac{1}{2} \|w_\mu\|_2^2 = V_\rho(0) \quad (125)$$

for the statistical setting.

We now can make the following observations about the bounds we have obtained in [Cor. 40](#) and [Cor. 42](#) for our Meta-Learning procedures.

#### G.4.2 Bias resulting from our Meta-Learning method

Looking at the bounds in [Cor. 40](#) and [Cor. 42](#), we can state that our Meta-Learning methods are effective, because, when the number of training tasks is sufficiently large w.r.t. the number of points  $n$  (hence the term  $T^{-1/2}$  is negligible), with an appropriate tuning of the hyper-parameters  $\lambda$  and  $\eta$ , the bias vector estimated by our methods can provide comparable guarantees as those for the corresponding best bias vector in hindsight in [Cor. 41](#) and [Cor. 43](#). As a consequence, when the tasks are similar as explained above, our methods can provide a significant advantage w.r.t. ITL. These observations are in line with [\[11\]](#), where we only consider the statistical setting and we present the same bound in [Cor. 42](#) with slightly worse constants.

## H Specializing to the feature map in [Ex. 2](#)

In this chapter we specify our Meta-Learning framework to the setting in [Ex. 2](#). We recall that, in such a case, the meta-parameter coincides with a linear feature map  $\theta \in \mathbb{S}_+^d$  and, as we will see in the following, the tasks' similarity translates into the existence of a low-rank linear feature map containing in its range the tasks' target vectors. We start this chapter by specializing in [App. H.1](#) our general OWO method to [Ex. 2](#), deriving the corresponding inner and meta-algorithm. The method is then analyzed in [App. H.2](#) and [App. H.3](#), where we consider the non-statistical setting and the statistical setting, respectively. Finally in [App. H.4](#), we discuss the results.

### H.1 Deriving the method for [Ex. 2](#)

We start from specializing the generic inner algorithm in [Alg. 2](#) and the generic meta-algorithm in [Alg. 3](#) to the setting outlined in [Ex. 2](#). The algorithms we obtain are reported in [Alg. 7](#) and [Alg. 8](#), respectively, where,  $\text{proj}_{\mathcal{S}}$  is the Euclidean projection over the set  $\mathcal{S}$  and we recall that  $X_t \in \mathbb{R}^{n \times d}$  denotes the input vectors' matrix of the task  $t$ , having as  $i$ -th row the input vector  $x_{t,i}$ . The deduction is reported in [Lemma 44](#) and [Lemma 45](#) below, respectively.

We start from the deduction of the inner-algorithm in [Alg. 7](#).

**Lemma 44** (Derivation of the inner [Alg. 7](#), feature map). *For any  $i \in \{0, \dots, n\}$ , let  $w_{\theta,i+1}$  be the update of the (primal) variable deriving from applying [Alg. 2](#) to the dataset  $Z = (x_i, y_i)_{i=1}^n$  in the setting outlined in [Ex. 2](#) with feature map  $\theta \in \mathcal{S}$ . Let  $s'_{\theta,i} \in \partial \ell_i(\langle x_i, w_{\theta,i} \rangle)$  be the subgradient used by such an algorithm to compute  $w_{\theta,i+1}$ . Then,  $w_{\theta,i+1} \in \text{Ran}(\theta)$ . Moreover,  $w_{\theta,1} = 0 \in \mathbb{R}^d$  and, for any  $i \in \{1, \dots, n\}$ , introducing the subgradient of the regularized loss*

$$p_{\theta,i} = x_i s'_{\theta,i} + \lambda \theta^\dagger w_{\theta,i} \in \partial \left( \ell_i(\langle x_i, \cdot \rangle) + \frac{\lambda}{2} \langle \cdot, \theta^\dagger \cdot \rangle \right) (w_{\theta,i}), \quad (126)$$

we have

$$w_{\theta,i+1} = w_{\theta,i} - \frac{1}{\lambda(i+1)} (\theta x_i s'_{\theta,i} + \lambda w_{\theta,i}) = w_{\theta,i} - \frac{1}{\lambda(i+1)} \theta p_{\theta,i}. \quad (127)$$

**Algorithm 7** Within-task algorithm for [Ex. 2](#)


---

**Input**  $\lambda > 0, \theta \in \mathcal{S}, Z = (z_i)_{i=1}^n$   
**Initialization**  $s_{\theta,1} = (), w_{\theta,1} = 0$   
**For**  $i = 1$  to  $n$   
  Receive the datapoint  $z_i = (x_i, y_i)$   
  Compute  $s'_{\theta,i} \in \partial \ell_i(\langle x_i, w_{\theta,i} \rangle) \subseteq \mathbb{R}$   
  Define  $(s_{\theta,i+1})_i = s'_{\theta,i}, \gamma_i = \lambda(i+1)$   
  Define  $p_{\theta,i} = x_i s'_{\theta,i} + \lambda \theta^\dagger w_{\theta,i}$   
  Update  $w_{\theta,i+1} = w_{\theta,i} - 1/\gamma_i \theta p_{\theta,i}$   
**Return**  $(w_{\theta,i})_{i=1}^{n+1}, \bar{w}_\theta = \frac{1}{n} \sum_{i=1}^n w_{\theta,i}, s_{\theta,n+1}$

---

**Algorithm 8** Meta-algorithm for [Ex. 2](#)


---

**Input**  $\eta > 0, (Z_t)_{t=1}^T, \theta_0 \in \mathcal{S}$   
**Initialization**  $\theta_1 = \theta_0, P_1 = 0 \in \mathbb{S}^d$   
**For**  $t = 1$  to  $T$   
  Receive incrementally the dataset  $Z_t$   
  Run [Alg. 7](#) with  $\theta_t$  over  $Z_t$   
  Compute  $s_{\theta_t,n+1}$   
  Define  $\nabla'_{\theta_t} = -\frac{q_t q_t^\top}{2\lambda n^2} \quad q_t = X_t^\top s_{\theta_t,n+1}$   
  Update  $P_{t+1} = P_t + \nabla'_{\theta_t}$   
  Update  $\theta_{t+1} = \text{proj}_{\mathcal{S}}(-P_{t+1}/\eta + \theta_0)$   
**Return**  $(\theta_t)_{t=1}^{T+1}, \bar{\theta} = \frac{1}{T} \sum_{t=1}^T \theta_t$

---

**Proof.** We start from observing that, according to the choices made in [Ex. 2](#), for any  $\theta \in \mathcal{S}$  and for any  $w, u \in \mathbb{R}^d$ , we have

$$f(w, \theta) = \frac{1}{2} \langle w, \theta^\dagger w \rangle + \iota_{\text{Ran}(\theta)}(w) \quad f(\cdot, \theta)^*(u) = \frac{1}{2} \|\theta^{1/2} u\|_2^2 \quad \nabla f(\cdot, \theta)^*(u) = \theta u. \quad (128)$$

As a consequence, as observed in [Prop. 2](#), for any  $\theta \in \Theta$ , we get that  $w_{\theta,i+1} \in \text{Dom} f(\cdot, \theta) = \text{Ran}(\theta)$ , for any  $i \in \{0, \dots, n\}$ . Moreover, according to the definition of  $w_{\theta,1}$  in [Alg. 2](#), we have

$$w_{\theta,1} = \nabla f(\cdot, \theta)^*(0) = 0. \quad (129)$$

We now show the closed form of  $w_{\theta,i+1}$  for any  $i \in \{1, \dots, n\}$ . In such a case, denoting by  $X_{1:i} \in \mathbb{R}^{i \times d}$  the matrix containing the first  $i$  input vectors as rows, by definition of  $w_{\theta,i+1}$  in [Alg. 2](#), we can write

$$w_{\theta,i+1} = \nabla f(\cdot, \theta)^* \left( -\frac{1}{\lambda(i+1)} X_{1:i}^\top s_{\theta,i+1} \right) = -\frac{1}{\lambda(i+1)} \theta X_{1:i}^\top s_{\theta,i+1}. \quad (130)$$

For  $i = 1$  the statement holds, as a matter of fact, since  $w_{\theta,1} = 0$ , exploiting [Eq. \(130\)](#) and introducing the subgradient  $p_{\theta,1} = x_1 s'_{\theta,1} + \lambda \theta^\dagger w_{\theta,1} = x_1 s'_{\theta,1}$ , we can write

$$w_{\theta,2} = -\frac{1}{2\lambda} \theta x_1 s'_{\theta,1} = w_{\theta,1} - \frac{1}{2\lambda} \theta p_{\theta,1}. \quad (131)$$

Now, we show that the statement holds also for  $i \in \{2, \dots, n\}$ . Since  $X_{1:i}^\top s_{\theta,i+1} = X_{1:i-1}^\top s_{\theta,i} + x_i s'_{\theta,i}$ , we can write the following

$$\begin{aligned} w_{\theta,i+1} &= -\frac{1}{\lambda(i+1)} \theta X_{1:i}^\top s_{\theta,i+1} = -\frac{1}{\lambda(i+1)} \left( \theta X_{1:i-1}^\top s_{\theta,i} + \theta x_i s'_{\theta,i} \right) \\ &= \frac{\lambda i}{\lambda(i+1)} \left( -\frac{1}{\lambda i} \theta X_{1:i-1}^\top s_{\theta,i} \right) - \frac{\theta x_i s'_{\theta,i}}{\lambda(i+1)} \\ &= \frac{\lambda(i+1) w_{\theta,i} - \theta x_i s'_{\theta,i} - \lambda w_{\theta,i}}{\lambda(i+1)} \\ &= w_{\theta,i} - \frac{1}{\lambda(i+1)} (\theta x_i s'_{\theta,i} + \lambda w_{\theta,i}) = w_{\theta,i} - \frac{1}{\lambda(i+1)} \theta p_{\theta,i}, \end{aligned} \quad (132)$$

where, in the first and the fourth equality, we have exploited [Eq. \(130\)](#) and in the sixth equality we have exploited the form of the subgradient  $p_{\theta,i} = x_i s'_{\theta,i} + \lambda \theta^\dagger w_{\theta,i}$  and the fact that  $w_{\theta,i} \in \text{Ran}(\theta)$ .  $\blacksquare$

We now proceed with the deduction of the meta-algorithm in [Alg. 8](#).

**Lemma 45** (Derivation of the meta-algorithm in [Alg. 8](#), feature map). *For any  $t \in \{0, \dots, T\}$ , let  $\theta_{t+1}$  be the update of the variable deriving from applying [Alg. 3](#) to the data  $(Z_t)_{t=1}^T$  in the setting outlined in [Ex. 2](#). Let  $\nabla'_{\theta_t}$  be the approximated meta-subgradient computed as described in [Prop. 3](#) and used by the algorithm to compute  $\theta_{t+1}$ . Then,  $\theta_{t+1} \in \mathcal{S}$ . Specifically, we have  $\theta_1 = \theta_0$  and, for any  $t \in \{1, \dots, T\}$ ,*

$$\theta_{t+1} = \text{proj}_{\mathcal{S}} \left( -\frac{1}{\eta} \sum_{j=1}^t \nabla'_{\theta_j} + \theta_0 \right). \quad (133)$$

Moreover, for any  $t \in \{1, \dots, T\}$ ,

$$\nabla'_{\theta_t} = -\frac{1}{2\lambda n^2} X_t^\top s_{\theta_t, n+1} s_{\theta_t, n+1}^\top X_t, \quad (134)$$

where  $s_{\theta_t, n+1} \in \mathbb{R}^n$  is the output of [Alg. 8](#) with feature map  $\theta_t$  over the dataset  $Z_t$  and, under [Asm. 3](#),

$$\|\nabla'_{\theta_t}\|_F^2 \leq \frac{L^4 \|C_t\|_\infty^2}{4\lambda^2}. \quad (135)$$

**Proof.** We start from observing that, according to the choices made in [Ex. 2](#), according to [Lemma 30](#) in [App. B](#), for any  $K \in \mathbb{S}^d$ ,  $\theta \in \mathcal{S}$  and  $u \in \mathbb{R}^d$ , we have

$$\begin{aligned} F(\theta) &= \frac{1}{2} \|\theta - \theta_0\|_F^2 + \iota_{\mathcal{S}}(\theta) \\ F^*(K) &= \max_{\theta \in \mathcal{S}} \langle \theta, K \rangle - \frac{1}{2} \|\theta - \theta_0\|_F^2 \\ \nabla F^*(K) &= \operatorname{argmax}_{\theta \in \mathcal{S}} \langle \theta, K \rangle - \frac{1}{2} \|\theta - \theta_0\|_F^2 = \operatorname{argmin}_{\theta \in \mathcal{S}} \frac{1}{2} \|\theta - \theta_0\|_F^2 - \langle \theta, K \rangle \\ &= \operatorname{argmin}_{\theta \in \mathcal{S}} \frac{1}{2} \|\theta - (K + \theta_0)\|_F^2 - \frac{1}{2} \|K\|_F^2 - \langle \theta_0, K \rangle \\ &= \text{proj}_{\mathcal{S}}(K + \theta_0) \\ f(\cdot, \theta)^*(u) &= \frac{1}{2} \|\theta^{1/2} u\|_2^2. \end{aligned} \quad (136)$$

Consequently, according to the definition of  $\theta_1$  in [Alg. 3](#), we have

$$\theta_1 = \nabla F^*(0) = \theta_0. \quad (137)$$

The desired closed form of  $\theta_{t+1}$  for any  $t \in \{1, \dots, T\}$  directly derives from the definition of  $\theta_{t+1}$  in [Alg. 3](#), according to which

$$\theta_{t+1} = \nabla F^* \left( -\frac{1}{\eta} \sum_{j=1}^t \nabla'_{\theta_j} \right) = \text{proj}_{\mathcal{S}} \left( -\frac{1}{\eta} \sum_{j=1}^t \nabla'_{\theta_j} + \theta_0 \right). \quad (138)$$

We now specify the closed form of the approximated meta-subgradients, computed as described in [Prop. 3](#) for [Ex. 2](#). We start from observing that adding to the notation in [Prop. 3](#) the further task index  $t$ , by strong duality (see [Lemma 34](#)), we can rewrite

$$\mathcal{L}_t(\theta) = \max_{s \in \mathbb{R}^n} \tilde{D}_{t, n+1}(s, \theta) \quad \tilde{D}_{t, n+1}(s, \theta) = -\frac{1}{n} D_{t, n+1}(s, \theta) \quad (139)$$

where, according to [Eq. \(8\)](#), in the setting outlined in [Ex. 2](#),

$$\begin{aligned} -D_{t, n+1}(s, \theta) &= -\sum_{i=1}^n \ell_{t, i}^*(s_i) - \lambda n f(\cdot, \theta)^* \left( -\frac{1}{\lambda n} \sum_{i=1}^n x_{t, i} s_i \right) \\ &= -\sum_{i=1}^n \ell_{t, i}^*(s_i) - \lambda n f(\cdot, \theta)^* \left( -\frac{1}{\lambda n} X_t^\top s \right) \\ &= -\sum_{i=1}^n \ell_{t, i}^*(s_i) - \frac{1}{2\lambda n} s^\top X_t \theta X_t^\top s. \end{aligned} \quad (140)$$

Consequently, recalling that the output  $s_{\theta_t, n+1}$  of the inner algorithm coincides with the last iterate of the corresponding dual inner iteration, according to [Prop. 3](#), we have

$$\nabla_{\theta_t} = -\frac{1}{2\lambda n} X_t^\top s_{\theta_t, n+1} s_{\theta_t, n+1}^\top X_t \quad (141)$$

and, consequently,

$$\nabla'_{\theta_t} = \nabla_{\theta_t} / n \in \partial_{\epsilon_{\theta_t}/n} \mathcal{L}_t(\theta_t), \quad (142)$$

where  $\epsilon_{\theta_t}$  is outlined in [Prop. 3](#) and it must be specified to [Ex. 2](#). In order to prove [Eq. \(135\)](#), we start from observing that  $s_{\theta_t, n+1}$  is the vector in  $\mathbb{R}^n$  having as component  $i$  the subgradient  $s'_{\theta_t, i} \in \partial \ell_{t, i}(\langle x_{t, i}, w_{\theta_t, i} \rangle)$ . Hence, under [Asm. 3](#), by [Lemma 25](#) in [App. B](#), any component of  $s_{\theta_t, n+1}$  is absolutely bounded by  $L$ , and, consequently,  $\|s_{\theta_t, n+1}\|_2 \leq L\sqrt{n}$ . This allows us to get the desired bound by applying Holder's inequality (see [Lemma 8](#) in [App. B](#)) to the matrices' scalar product as follows

$$\begin{aligned} \|\nabla'_{\theta_t}\|_F &= \frac{1}{2\lambda n} \text{Tr}\left(\frac{1}{n} \sum_{i=1}^n x_{t, i} x_{t, i}^\top s_{\theta_t, n+1} s_{\theta_t, n+1}^\top\right) \leq \frac{1}{2\lambda n} \left\| \frac{1}{n} \sum_{i=1}^n x_{t, i} x_{t, i}^\top \right\|_\infty \|s_{\theta_t, n+1}\|_2^2 \\ &\leq \frac{L^2}{2\lambda} \left\| \frac{1}{n} \sum_{i=1}^n x_{t, i} x_{t, i}^\top \right\|_\infty = \frac{L^2 \|C_t\|_\infty}{2\lambda}, \end{aligned}$$

where in the last equality we have introduced the definition of  $C_t$ . ■

We observe that the meta-algorithm we have retrieved in [Alg. 8](#) is a slightly different version of that one proposed in [\[12\]](#), where we consider only an OWB statistical Meta-Learning framework. We refer to the discussion in [App. A](#) for more details about that work.

We also observe that for the setting in [Ex. 2](#), our Meta-Learning method in [Alg. 7](#) and [Alg. 8](#) requires to compute the eigenvalue decomposition of a rank one perturbation of the current matrix. This can be performed using methods such as the ones in [\[39\]](#), which essentially scale quadratically w.r.t. the input dimension. As done in [\[8\]](#) for an OWB statistical Meta-Learning setting, a cheaper alternative here may be to use as meta-algorithm Frank-Wolfe, which requires to compute only the maximum eigenvalue. However, the better scaling property of this method comes at the price of a slower learning/convergence rate.

In the next section, we analyze the performance of our OWO Meta-Learning method applied to [Ex. 2](#), in the non-statistical setting.

## H.2 Analysis of the method in the non-statistical setting for [Ex. 2](#)

In the next result we specify [Thm. 4](#) to [Ex. 2](#), that is, we provide a (regularized) cumulative error bound for the procedure deriving from combining [Alg. 7](#) with [Alg. 8](#).

**Corollary 6** (Cumulative error bound, feature map, long version). *Let [Asm. 3](#) hold and consider the setting in [Thm. 4](#) applied to [Ex. 2](#). Then, introducing the empirical covariance matrix of the vectors  $(\hat{w}_t)_{t=1}^T$*

$$\hat{B} = \frac{1}{T} \sum_{t=1}^T \hat{w}_t \hat{w}_t^\top, \quad (143)$$

the following (regularized) cumulative error bound holds for any  $\theta \in \mathcal{S}$  such that  $\text{Ran}(\hat{B}) \subseteq \text{Ran}(\theta)$ ,

$$\mathcal{E}_{\text{meta}}^{\text{reg}}((Z_t)_{t=1}^T) \leq nT \left( \frac{1}{T} \sum_{t=1}^T \mathcal{R}_{Z_t}(\hat{w}_t) + \frac{\lambda \text{Tr}(\theta^\dagger \hat{B})}{2} + \frac{L^2 \text{Tr}(\hat{C}_{\theta_{1:T}}^{\text{tot}})}{2\lambda n} + \frac{\eta \|\theta - \theta_0\|_F^2}{2T} + \frac{L^4 \|C^{\text{tot}}\|_{\infty, 2}}{8\lambda^2 \eta} \right)$$

where we have defined the matrix

$$\hat{C}_{\theta_{1:T}}^{\text{tot}} = \frac{1}{T} \sum_{t=1}^T \theta_t \hat{C}_t. \quad (144)$$

Hence, optimizing w.r.t. the hyper-parameters  $\lambda$  and  $\eta$ , for

$$\lambda = L \sqrt{\frac{1}{\text{Tr}(\theta^\dagger \hat{B})} \left( \frac{\text{Tr}(\hat{C}_{\theta_{1:T}}^{\text{tot}})}{n} + \|\theta - \theta_0\|_F \sqrt{\frac{\|C^{\text{tot}}\|_{\infty, 2}}{T}} \right)} \quad \eta = \frac{L^2 \sqrt{T} \|C^{\text{tot}}\|_{\infty, 2}}{2\lambda \|\theta - \theta_0\|_F}, \quad (145)$$



we get

$$\mathcal{E}_{\text{meta}}^{\text{reg}}((Z_t)_{t=1}^T) \leq nT \left( \frac{1}{T} \sum_{t=1}^T \mathcal{R}_{Z_t}(\hat{w}_t) + L \sqrt{\text{Tr}(\theta^\dagger \hat{B}) \left( \frac{\text{Tr}(\hat{C}_{\theta_{1:T}}^{\text{tot}})}{n} + \|\theta - \theta_0\|_F \sqrt{\frac{\|C^{\text{tot}}\|_{\infty,2}}{T}} \right)} \right).$$

**Proof.** Specializing [Thm. 4](#) to the quantities outlined in [Ex. 2](#), exploiting the bound on the norm of the approximated meta-subgradients given in [Eq. \(135\)](#) (exploiting [Asm. 3](#)), and using the notation in [Eq. \(143\)](#) for any  $\theta \in \mathcal{S}$  such that  $\text{Ran}(\hat{B}) \subseteq \text{Ran}(\theta)$ , we get

$$\begin{aligned} \mathcal{E}_{\text{meta}}^{\text{reg}}((Z_t)_{t=1}^T) \leq nT \left( \frac{1}{T} \sum_{t=1}^T \mathcal{R}_{Z_t}(\hat{w}_t) + \frac{\lambda \text{Tr}(\theta^\dagger \hat{B})}{2} + \frac{1}{2\lambda nT} \sum_{t=1}^T \sum_{i=1}^n \frac{1}{i} \|\theta_t^{1/2} x_{t,i} s'_{\theta_t,i}\|_2^2 \right. \\ \left. + \frac{\eta \|\theta - \theta_0\|_F^2}{2T} + \frac{L^4 \|C^{\text{tot}}\|_{\infty,2}}{8\lambda^2 \eta} \right). \end{aligned} \quad (146)$$

The statement derives from the above inequality observing that, under [Asm. 3](#) using the definition of  $\hat{C}_{\theta_{1:T}}^{\text{tot}}$  in [Eq. \(144\)](#), we can write

$$\frac{1}{T} \sum_{t=1}^T \sum_{i=1}^n \frac{1}{i} \|\theta_t^{1/2} x_{t,i} s'_{\theta_t,i}\|_2^2 \leq L^2 \text{Tr} \left( \frac{1}{T} \sum_{t=1}^T \theta_t \sum_{i=1}^n \frac{1}{i} x_{t,i} x_{t,i}^\top \right) = L^2 \text{Tr}(\hat{C}_{\theta_{1:T}}^{\text{tot}}). \quad (147)$$

■

Also in this case, in order to evaluate the quality of the bound above, we specify [Thm. 36](#) to [Ex. 2](#), that is, we provide a (regularized) cumulative error bound for the procedure deriving from running the within-task [Alg. 7](#) with an appropriate feature map fixed in hindsight for any task.

**Corollary 46** (Cumulative error bound with fixed meta-parameter in hindsight, feature map). *Let [Asm. 3](#) hold and consider the setting in [Thm. 36](#) applied to [Ex. 2](#). Then, according to the notation in [Eq. \(143\)](#), the following (regularized) cumulative error bound holds for any  $\theta \in \mathcal{S}$  such that  $\text{Ran}(\hat{B}) \subseteq \text{Ran}(\theta)$*

$$\sum_{t=1}^T \mathcal{E}_{\text{inner}}^{\text{reg}}(Z_t, \theta) \leq nT \left( \frac{1}{T} \sum_{t=1}^T \mathcal{R}_{Z_t}(\hat{w}_t) + \frac{\lambda \text{Tr}(\theta^\dagger \hat{B})}{2} + \frac{L^2 \text{Tr}(\theta \hat{C}^{\text{tot}})}{2\lambda n} \right). \quad (148)$$

Hence, optimizing w.r.t. the hyper-parameter  $\lambda$ , for

$$\lambda = L \sqrt{\frac{\text{Tr}(\theta \hat{C}^{\text{tot}})}{n \text{Tr}(\theta^\dagger \hat{B})}}, \quad (149)$$

we get

$$\sum_{t=1}^T \mathcal{E}_{\text{inner}}^{\text{reg}}(Z_t, \theta) \leq nT \left( \frac{1}{T} \sum_{t=1}^T \mathcal{R}_{Z_t}(\hat{w}_t) + L \sqrt{\frac{\text{Tr}(\theta^\dagger \hat{B}) \text{Tr}(\theta \hat{C}^{\text{tot}})}{n}} \right). \quad (150)$$

**Proof.** Specializing [Thm. 36](#) to the quantities outlined in [Ex. 2](#), using the notation in [Eq. \(143\)](#), for any  $\theta \in \mathcal{S}$  such that  $\text{Ran}(\hat{B}) \subseteq \text{Ran}(\theta)$ , we get

$$\sum_{t=1}^T \mathcal{E}_{\text{inner}}^{\text{reg}}(Z_t, \theta) \leq nT \left( \frac{1}{T} \sum_{t=1}^T \mathcal{R}_{Z_t}(\hat{w}_t) + \frac{\lambda \text{Tr}(\theta^\dagger \hat{B})}{2} + \frac{1}{2\lambda nT} \sum_{t=1}^T \sum_{i=1}^n \frac{1}{i} \|\theta^{1/2} x_{t,i} s'_{\theta,i}\|_2^2 \right).$$

The statement derives from the above inequality observing that, under [Asm. 3](#) using the definition of the matrix  $\hat{C}^{\text{tot}}$ , we can write

$$\frac{1}{T} \sum_{t=1}^T \sum_{i=1}^n \frac{1}{i} \|\theta^{1/2} x_{t,i} s'_{\theta,i}\|_2^2 \leq L^2 \text{Tr} \left( \theta \frac{1}{T} \sum_{t=1}^T \sum_{i=1}^n \frac{1}{i} x_{t,i} x_{t,i}^\top \right) = L^2 \text{Tr}(\theta \hat{C}^{\text{tot}}). \quad (151)$$

■

We postpone to [App. H.4](#) a discussion about the results we have reported above. In the next section, we analyze the performance of our OWO Meta-Learning method applied to [Ex. 2](#), in the statistical setting.

### H.3 Analysis of the method in the statistical setting for [Ex. 2](#)

In the result below we specify [Thm. 5](#) to [Ex. 2](#), that is, we provide a (regularized) transfer risk bound for the average  $\bar{w}_{\bar{\theta}}$  of the estimators returned by the combination of [Alg. 7](#) with [Alg. 8](#).

**Corollary 7** (Transfer risk bound, bias, long version). *Let [Asm. 3](#) hold and consider the statistical setting in [Thm. 5](#) applied to [Ex. 2](#). Then, introducing the exact covariance matrix of the vectors  $w_\mu$*

$$B_\rho = \mathbb{E}_{\mu \sim \rho} w_\mu w_\mu^\top, \quad (152)$$

the following (regularized) transfer risk bound holds for any  $\theta \in \mathcal{S}$  such that  $\text{Ran}(B_\rho) \subseteq \text{Ran}(\theta)$

$$\begin{aligned} \mathbb{E} \mathcal{E}_{\text{stat}}^{\text{reg}}(\bar{w}_{\bar{\theta}}) \leq & \mathcal{E}_\rho + \frac{\lambda \text{Tr}(\theta^\dagger B_\rho)}{2} + \frac{L^2(\log(n) + 1) \text{Tr}(\mathbb{E} \bar{\theta} C_\rho)}{\lambda n} \\ & + \frac{\eta \|\theta - \theta_0\|_F^2}{2T} + \frac{L^4 \mathbb{E} \|C^{\text{tot}}\|_{\infty,2}}{8\lambda^2 \eta}. \end{aligned} \quad (153)$$

Hence, optimizing w.r.t. the hyper-parameters  $\lambda$  and  $\eta$ , for

$$\lambda = L \sqrt{\frac{1}{\text{Tr}(\theta^\dagger B_\rho)} \left( \frac{2(\log(n) + 1) \text{Tr}(\mathbb{E} \bar{\theta} C_\rho)}{n} + \|\theta - \theta_0\|_F \sqrt{\frac{\mathbb{E} \|C^{\text{tot}}\|_{\infty,2}}{T}} \right)} \quad (154)$$

$$\eta = \frac{L^2 \sqrt{T} \mathbb{E} \|C^{\text{tot}}\|_{\infty,2}}{2\lambda \|\theta - \theta_0\|_F}, \quad (155)$$

we get

$$\mathbb{E} \mathcal{E}_{\text{stat}}^{\text{reg}}(\bar{w}_{\bar{\theta}}) \leq \mathcal{E}_\rho + L \sqrt{\text{Tr}(\theta^\dagger B_\rho) \left( \frac{2(\log(n) + 1) \text{Tr}(\mathbb{E} \bar{\theta} C_\rho)}{n} + \|\theta - \theta_0\|_F \sqrt{\frac{\mathbb{E} \|C^{\text{tot}}\|_{\infty,2}}{T}} \right)}.$$

**Proof.** Specializing [Thm. 5](#) to the quantities outlined in [Ex. 2](#), exploiting the bound on the norm of the approximated meta-subgradients given in [Eq. \(135\)](#) (exploiting [Asm. 3](#)) and using the notation in [Eq. \(152\)](#), for any  $\theta \in \mathcal{S}$  such that  $\text{Ran}(B_\rho) \subseteq \text{Ran}(\theta)$ , we get the following

$$\begin{aligned} \mathbb{E} \mathcal{E}_{\text{stat}}^{\text{reg}}(\bar{w}_{\bar{\theta}}) \leq & \mathcal{E}_\rho + \frac{\lambda \text{Tr}(\theta^\dagger B_\rho)}{2} + \frac{1}{2\lambda n T} \mathbb{E} \sum_{t=1}^T \sum_{i=1}^n \frac{1}{i} \|\theta_t^{1/2} x_{t,i} s'_{\theta_t,i}\|_2^2 \\ & + \frac{\eta \|\theta - \theta_0\|_F^2}{2T} + \frac{L^4 \mathbb{E} \|C^{\text{tot}}\|_{\infty,2}}{8\lambda^2 \eta} \\ & + \frac{1}{2\lambda n} \mathbb{E} \mathbb{E}_{\mu \sim \rho} \mathbb{E}_{Z \sim \mu^n} \sum_{i=1}^n \frac{1}{i} \|\bar{\theta}^{1/2} x_i s'_{\bar{\theta},i}\|_2^2. \end{aligned} \quad (156)$$

The desired statement derives from the above inequality and from observing that, thanks to [Asm. 3](#), the i.i.d. sampling of the data and the fact that  $\theta_t$  depends only on the previous datasets  $(Z_j)_{j=1}^{t-1}$ , using the inequality  $\sum_{i=1}^n 1/i \leq \log(n) + 1$  and the definition of  $C_\rho$ , we have

$$\begin{aligned} \mathbb{E} \frac{1}{T} \sum_{t=1}^T \sum_{i=1}^n \frac{1}{i} \|\theta_t^{1/2} x_{t,i} s'_{\theta_t,i}\|_2^2 & \leq L^2 \mathbb{E} \text{Tr} \left( \frac{1}{T} \sum_{t=1}^T \theta_t \sum_{i=1}^n \frac{1}{i} x_{t,i} x_{t,i}^\top \right) \\ & = L^2 (\log(n) + 1) \text{Tr}(\mathbb{E} \bar{\theta} C_\rho) \end{aligned} \quad (157)$$

$$\begin{aligned} \mathbb{E} \mathbb{E}_{\mu \sim \rho} \mathbb{E}_{Z \sim \mu^n} \sum_{i=1}^n \frac{1}{i} \|\bar{\theta} x_i s'_{\bar{\theta},i}\|_2^2 & \leq L^2 \mathbb{E} \mathbb{E}_{\mu \sim \rho} \mathbb{E}_{Z \sim \mu^n} \text{Tr} \left( \bar{\theta} \sum_{i=1}^n \frac{1}{i} x_i x_i^\top \right) \\ & = L^2 (\log(n) + 1) \text{Tr}(\mathbb{E} \bar{\theta} C_\rho). \end{aligned} \quad (158)$$

■

In order to evaluate the quality of the bound above, we specify [Thm. 37](#) to [Ex. 2](#), that is, we provide a (regularized) transfer risk bound for  $\bar{w}_\theta$ , the average of the iterations returned by running the within-task [Alg. 7](#) with an appropriate feature map  $\theta$  fixed in hindsight for any task.

**Corollary 47** (Transfer risk bound with fixed meta-parameter in hindsight, feature map). *Let [Asm. 3](#) hold and consider the statistical setting in [Thm. 37](#) applied to [Ex. 2](#). Then, according to the notation in [Eq. \(152\)](#), the following (regularized) transfer risk bound holds for any  $\theta \in \mathcal{S}$  such that  $\text{Ran}(B_\rho) \subseteq \text{Ran}(\theta)$*

$$\mathcal{E}_{\text{stat}}^{\text{reg}}(\bar{w}_{\bar{\theta}}) \leq \mathcal{E}_\rho + \frac{\lambda \text{Tr}(\theta^\dagger B_\rho)}{2} + \frac{L^2(\log(n) + 1) \text{Tr}(\theta C_\rho)}{2\lambda n}. \quad (159)$$

Hence, optimizing w.r.t. the hyper-parameter  $\lambda$ , for

$$\lambda = L \sqrt{\frac{(\log(n) + 1) \text{Tr}(\theta C_\rho)}{n \text{Tr}(\theta^\dagger B_\rho)}}, \quad (160)$$

we get

$$\mathcal{E}_{\text{stat}}^{\text{reg}}(\bar{w}_{\bar{\theta}}) \leq \mathcal{E}_\rho + L \sqrt{\frac{(\log(n) + 1) \text{Tr}(\theta^\dagger B_\rho) \text{Tr}(\theta C_\rho)}{n}}.$$

**Proof.** Specializing [Thm. 37](#) to the quantities outlined in [Ex. 2](#), using the notation in [Eq. \(152\)](#), for any  $\theta \in \mathcal{S}$  such that  $\text{Ran}(B_\rho) \subseteq \text{Ran}(\theta)$ , we get the following

$$\mathcal{E}_{\text{stat}}^{\text{reg}}(\bar{w}_{\bar{\theta}}) \leq \mathcal{E}_\rho + \frac{\lambda \text{Tr}(\theta^\dagger B_\rho)}{2} + \frac{1}{2\lambda n} \mathbb{E}_{\mu \sim \rho} \mathbb{E}_{Z \sim \mu^n} \sum_{i=1}^n \frac{1}{i} \|\theta^{1/2} x_i s'_{\theta,i}\|_2^2.$$

The desired statement derives from the above inequality and from observing that, under [Asm. 3](#), exploiting the i.i.d. sampling of the data and the inequality  $\sum_{i=1}^n 1/i \leq \log(n) + 1$ , introducing the definition of the matrix  $C_\rho$ , we can write

$$\begin{aligned} \mathbb{E}_{\mu \sim \rho} \mathbb{E}_{z_n \sim \mu^n} \sum_{i=1}^n \frac{1}{i} \|\theta^{1/2} x_i s'_{\theta,i}\|_2^2 &\leq L^2 \mathbb{E}_{\mu \sim \rho} \mathbb{E}_{Z \sim \mu^n} \text{Tr}\left(\theta \sum_{i=1}^n \frac{1}{i} x_i x_i^\top\right) \\ &\leq L^2 (\log(n) + 1) \text{Tr}(\theta C_\rho). \end{aligned} \quad (161)$$

■

Also in this case, the comments to the bounds above are postponed in the following [App. H.4](#).

#### H.4 Discussion of the results for [Ex. 2](#)

We start from discussing the results in [Cor. 46](#) and [Cor. 47](#), where the feature map used by the inner algorithm is fixed in hindsight for any task.

##### H.4.1 Advantage of selecting the right feature map

We first comment the bounds in the statistical setting in [Cor. 47](#). In this case, proceeding in the same way as described for [Ex. 1](#), we should define the best algorithm in our class (*oracle*) the algorithm associated to the feature map minimizing the bound in [Cor. 47](#). However, in our case, to simplify the analysis we consider as the oracle the algorithm associated to the feature map  $\theta_\rho$  minimizing only a part of the above bound which is available in closed form. Specifically, appealing to the infimal formulation of the MTL trace norm regularizer in [\[2, Eq. \(13\)\]](#), we minimize only the term  $\text{Tr}(\theta^\dagger B_\rho)$  over the subset of the feature maps  $\{\theta \in \mathcal{S} : \text{Ran}(B_\rho) \subseteq \text{Ran}(\theta)\}$  for which our bound holds:

$$\min_{\theta \in \mathcal{S} : \text{Ran}(B_\rho) \subseteq \text{Ran}(\theta)} \text{Tr}(\theta^\dagger B_\rho) = \text{Tr}(B_\rho^{1/2})^2 = \|W_\rho\|_{\text{Tr}}^2, \quad (162)$$

where  $W_\rho$  is a square root of  $B_\rho$ . We consider as the optimal feature map the corresponding minimizer

$$\theta_\rho = \underset{\theta \in \mathcal{S} : \text{Ran}(B_\rho) \subseteq \text{Ran}(\theta)}{\text{argmin}} \text{Tr}(\theta^\dagger B_\rho) = \frac{W_\rho}{\text{Tr}(W_\rho)}. \quad (163)$$

Similarly to what observed in [App. G.4](#) for the setting in [Ex. 1](#), we will consider this feature map as benchmark in order to evaluate the performance of our Meta-Learning procedure. With such a choice of feature map  $\theta_\rho$ , the bound in [Cor. 47](#) (up to logarithmic factors) becomes proportional to

$$\sqrt{\frac{\text{Tr}(\theta_\rho^\dagger B_\rho) \text{Tr}(\theta_\rho C_\rho)}{n}} \leq \|W_\rho\|_{\text{Tr}} \sqrt{\frac{\|C_\rho\|_\infty}{n}}, \quad (164)$$

where, in the inequality above, we have applied Holder's inequality (see [Lemma 8](#) in [App. B](#)) to the matrices' scalar product and we have exploited the fact  $\text{Tr}(\theta_\rho) = 1$ .

On the other hand, solving the tasks independently (ITL), in this case, corresponds to apply [Alg. 7](#) with the feature map  $\theta_{\text{ITL}} = I/d$  for any task. Substituting this value, the bound above becomes proportional to

$$\|W_\rho\|_F \sqrt{\frac{\text{Tr}(C_\rho)}{n}}. \quad (165)$$

Comparing the bounds in [Eq. \(164\)](#) and [Eq. \(165\)](#), we can conclude that there is an advantage in using the optimal feature map  $\theta_\rho$  w.r.t. solving each task independently, when the tasks are *similar* in the sense that  $\|C_\rho\|_\infty \ll \text{Tr}(C_\rho)$  (when the inputs are high-dimensional for instance) and when  $\|W_\rho\|_{\text{Tr}}$  is comparable to  $\|W_\rho\|_F$  (i.e. when the matrix  $W_\rho$  is low-rank, meaning that the tasks' target vectors are expected to lie in a low-dimensional subspace, the range of the optimal feature map). This is inline with previous literature, such as [\[12, 26, 25\]](#).

Regarding the non-statistical setting, in order to comment the cumulative error bound in [Cor. 46](#), one can proceed as above introducing the corresponding sub-optimal algorithm in the class associated to the corresponding sub-optimal feature map  $\hat{\theta}$ . The associated bound, in this case, becomes proportional to

$$\|\hat{W}\|_{\text{Tr}} \sqrt{\frac{\|\hat{C}^{\text{tot}}\|_\infty}{n}}, \quad (166)$$

where  $\hat{W}$  is a square root of  $\hat{B}$ . Comparing this last bound to the corresponding bound for ITL

$$\|\hat{W}\|_F \sqrt{\frac{\text{Tr}(\hat{C}^{\text{tot}})}{n}}, \quad (167)$$

we see that there is an advantage in using the optimal feature map  $\hat{\theta}$  w.r.t. solving each task independently, when  $\|\hat{C}^{\text{tot}}\|_\infty \ll \text{Tr}(\hat{C}^{\text{tot}})$  and  $\hat{W}$  is low-rank ( $\|\hat{W}\|_{\text{Tr}}$  is comparable to  $\|\hat{W}\|_F$ ). The first condition on the weighted input covariance matrix  $\hat{C}^{\text{tot}} = \frac{1}{T} \sum_{t=1}^T \sum_{i=1}^n \frac{1}{i} x_{t,i} x_{t,i}^\top$  is less clear to interpret than the more natural one  $\|C^{\text{tot}}\|_\infty \ll \text{Tr}(C^{\text{tot}})$  with the standard empirical input covariance matrix  $C^{\text{tot}} = \frac{1}{T} \sum_{t=1}^T \frac{1}{n} \sum_{i=1}^n x_{t,i} x_{t,i}^\top$ . However, in certain data configurations these two input covariance matrices, may still be closed one to each other. We think that this issue is avoidable by choosing the inner step size in different way and we will address it in future work.

We now can make the following observations about the bounds we have obtained in [Cor. 6](#) and [Cor. 7](#) for our Meta-Learning procedure.

#### H.4.2 Feature Map resulting from our Meta-Learning method

In order to analyze the effectiveness of our Meta-Learning method, we investigate whether it mimics the performance of the best algorithm in the class, when the number of training tasks is sufficiently large w.r.t. the number of within-task points. In such a case, the term  $T^{-1/4}$  is negligible and, applying Holder's inequality and exploiting the fact that, by construction,  $\text{Tr}(\bar{\theta}) \leq 1$ , as described above, the bound in [Cor. 7](#) (up to logarithmic factors) can be upper bounded by

$$\sqrt{\frac{\text{Tr}(\theta^\dagger B_\rho) \text{Tr}(C_\rho)}{n}}, \quad (168)$$

where  $\theta \in \mathcal{S}$  is the fixed feature map in the statement, defining the choice of the hyper-parameters for our method. In particular, choosing  $\theta = \theta_\rho$  in [Eq. \(163\)](#), the quantity above in [Eq. \(168\)](#) can be upper bounded by the bound in [Eq. \(164\)](#) for the best algorithm in the class. As a consequence, when

the tasks are similar as explained above, our methods can provide a significant advantage w.r.t. ITL in the statistical setting. We conclude observing that the cumulative error bound in [Cor. 6](#) for the non-statistical setting is less clear to interpret because of the presence of the modified version of the covariance matrix  $\hat{C}_{\theta_{1:T}}^{\text{tot}}$ . Future work may be devoted to investigate this point, which could be either an artifact of our analysis or due to some intrinsic characteristics of the feature learning problem we are considering.

## I Experimental details

In this section, we start from describing in [App. I.1](#) how we tuned the hyper-parameters for our OWO Meta-Learning method in the statistical setting. After that, in [App. I.2](#) we give some closed form expressions that we used for the implementation.

### I.1 Hyper-parameters tuning for our statistical OWO Meta-Learning method

Denote by  $\bar{\theta}_{T,\lambda,\eta}$  the average of the meta-parameters computed with  $T$  iterations (hence  $T$  datasets and tasks) of our meta-algorithm with hyper-parameters  $\lambda$  and  $\eta$ . In all the experiments, we obtained this meta-parameter by learning it on a collection of  $T_{\text{tr}}$  *training* datasets (tasks), each comprising a dataset  $Z_{\text{tr}}$  of  $n = n_{\text{tr}}$  input-output pairs  $z = (x, y) \in \mathcal{Z} = \mathcal{X} \times \mathcal{Y}$ . We performed this meta-training for different values of  $\lambda \in \{\lambda_1, \dots, \lambda_p\}$  and  $\eta \in \{\eta_1, \dots, \eta_r\}$  and we selected the best meta-parameter based on the prediction error measured on a separate set of  $T_{\text{va}}$  *validation* datasets (tasks). Once such optimal  $\lambda$  and  $\eta$  values were selected, we reported the error of the corresponding estimator on a set of  $T_{\text{te}}$  *test* datasets (tasks).

Note that the tasks in the test and validation sets were all provided with a training inner dataset  $Z_{\text{tr}}$  of  $n_{\text{tr}}$  points and a test inner dataset  $Z_{\text{te}}$  of  $n_{\text{te}}$  points, both sampled from the same distribution. Indeed, in order to evaluate the performance of a meta-parameter  $\theta$ , we needed first to train the corresponding algorithm on the training dataset  $Z_{\text{tr}}$ , and then, to test the performance of the resulting vector on the test set  $Z_{\text{te}}$ .

In addition to this, since we considered the online setting, the training datasets arrived one at the time, therefore model selection was performed *online*: the system kept track of all candidate values  $\bar{\theta}_{T_{\text{tr}},\lambda_j,\eta_k}$ ,  $j \in \{1, \dots, p\}$ ,  $k \in \{1, \dots, r\}$ , and, whenever a new training task was presented, these meta-parameters were all updated by incorporating the corresponding new observations. The best meta-parameter  $\theta$  was then returned at each iteration, based on its performance on the validation set, as explained before. The previous procedure describes how to tune simultaneously both  $\lambda$  and  $\eta$ . When the meta-parameter  $\theta$  we used was fixed a priori (e.g. in ITL), we just needed to tune the hyper-parameter  $\lambda$ ; in such a case the procedure was analogous to that one described above.

Specifically, in the experiments reported in the main body, we applied the validation procedure above as described in the following.

**Synthetic data.** We considered 14 candidates values for both  $\lambda$  and  $\eta$  in the range  $[10^{-5}, 10^5]$  with logarithmic spacing and we evaluated the performance of the estimated feature maps by using  $T = T_{\text{tr}} = 3000$ ,  $T_{\text{va}} = 100$ ,  $T_{\text{te}} = 500$  of the available tasks for meta-training, meta-validation and meta-testing, respectively. In order to train and to test the inner algorithm, we splitted each within-task dataset into  $n = n_{\text{tr}} = 50\% n_{\text{tot}}$  for training and  $n_{\text{te}} = 50\% n_{\text{tot}}$  for test.

**MovieLens-100k dataset.** In this case, we removed all movies with less than 20 users' ratings. We considered 14 candidates values for both  $\lambda$  and  $\eta$  in the range  $[10^{-5}, 10^5]$  with logarithmic spacing and we evaluated the performance of the estimated feature maps by splitting the tasks into  $T = T_{\text{tr}} = 700$ ,  $T_{\text{va}} = 100$ ,  $T_{\text{te}} = 139$  tasks used for meta-training, meta-validation and meta-testing, respectively. In order to train and to test the inner algorithm, we splitted each within-task dataset into  $n = n_{\text{tr}} = 75\% n_{\text{tot}}$  for training and  $n_{\text{te}} = 25\% n_{\text{tot}}$  for test.

**Mini-Wiki dataset.** We considered 14 candidates values for both  $\lambda$  and  $\eta$  in the range  $[10^{-5}, 10^5]$  with logarithmic spacing and we evaluated the performance of the estimated feature maps by splitting the tasks into  $T = T_{\text{tr}} = 500$ ,  $T_{\text{va}} = 100$ ,  $T_{\text{te}} = 213$  tasks used for meta-training, meta-validation and meta-testing, respectively. In order to train and to test the inner algorithm, we splitted each within-task dataset into  $n = n_{\text{tr}} = 75\% n_{\text{tot}}$  for training and  $n_{\text{te}} = 25\% n_{\text{tot}}$  for test.

**Algorithm 9** Within-task algorithm for Ex. 2, multi-class setting,  $\ell_i = \ell_{z_i}$  with  $\ell_{z_i}$  in Eq. (170)

---

**Input**  $\lambda > 0, \theta \in \mathcal{S}, Z = (z_i)_{i=1}^n$   
**Initialization**  $S_{\theta,1} = (), W_{\theta,1} = 0$   
**For**  $i = 1$  to  $n$   
    Receive the datapoint  $z_i = (x_i, y_i)$   
    Compute  $S'_{\theta,i} \in \partial \ell_i(W_{\theta,i}) \subseteq \mathbb{R}^{d \times M}$   
    Define  $(S_{\theta,i+1})_i = S'_{\theta,i}, \gamma_i = \lambda(i+1)$   
    Define  $P_{\theta,i} = S'_{\theta,i} + \lambda \theta^\dagger W_{\theta,i} \in \mathbb{R}^{d \times M}$   
    Update  $W_{\theta,i+1} = W_{\theta,i} - 1/\gamma_i \theta P_{\theta,i}$   
**Return**  $(W_{\theta,i})_{i=1}^{n+1}, \bar{W}_\theta = \frac{1}{n} \sum_{i=1}^n W_{\theta,i}, S_{\theta,n+1}$

---

**Algorithm 10** Meta-algorithm for Ex. 2, multi-class setting

---

**Input**  $\eta > 0, (Z_t)_{t=1}^T, \theta_0 \in \mathcal{S}$   
**Initialization**  $\theta_1 = \theta_0, P_1 = 0 \in \mathbb{S}^d$   
**For**  $t = 1$  to  $T$   
    Receive incrementally the dataset  $Z_t$   
    Run Alg. 7 with  $\theta_t$  over  $Z_t$   
    Compute  $(S'_{\theta_t,i})_{i=1}^n$   
    Define  $\nabla'_{\theta_t} = -\frac{Q_t Q_t^\top}{2\lambda n^2}$   $Q_t = \sum_{i=1}^n S'_{\theta_t,i}$   
    Update  $P_{t+1} = P_t + \nabla'_{\theta_t}$   
    Update  $\theta_{t+1} = \text{proj}_{\mathcal{S}}(-P_{t+1}/\eta + \theta_0)$   
**Return**  $(\theta_t)_{t=1}^{T+1}, \bar{\theta} = \frac{1}{T} \sum_{t=1}^T \theta_t$

---

**Jester-1 dataset.** In this case, we randomly subsampled the 24983 jokes to end up with 5700 total number of tasks. We considered 14 candidates values for both  $\lambda$  and  $\eta$  in the range  $[10^{-5}, 10^5]$  with logarithmic spacing and we evaluated the performance of the estimated feature maps by splitting the tasks into  $T = T_{\text{tr}} = 5000, T_{\text{va}} = 200, T_{\text{te}} = 500$  tasks used for meta-training, meta-validation and meta-testing, respectively. In order to train and to test the inner algorithm, we splitted each within-task dataset into  $n = n_{\text{tr}} = 75\% n_{\text{tot}}$  for training and  $n_{\text{te}} = 25\% n_{\text{tot}}$  for test.

All the experiments were conducted on an Intel Xeon E5-2697 V3 2.60Ghz CPU with 32GB RAM.

## I.2 Closed forms for the implementation

At last, we report the closed forms we used in our experiments.

**Absolute loss for regression.** Let  $\mathcal{Y} \subseteq \mathbb{R}$ . For any  $\hat{y}, y \in \mathcal{Y}$ , let  $\ell(\hat{y}, y) = |\hat{y} - y|$  and denote  $\ell_y(\cdot) = \ell(\cdot, y)$ . Then, we have

$$\partial \ell_y(\hat{y}) = \begin{cases} \{1\} & \text{if } \hat{y} - y > 0 \\ \{-1\} & \text{if } \hat{y} - y < 0 \\ [-1, 1] & \text{if } \hat{y} - y = 0. \end{cases} \quad (169)$$

**Hinge loss for multi-class classification.** Let  $\mathcal{X} \subseteq \mathbb{R}^d$  and  $\mathcal{Y} = \{1, \dots, M\}$ , where  $M$  is the number of classes. We measure the error of the predictors' matrix  $W \in \mathbb{R}^{d \times M}$  over a datapoint  $z = (x, y) \in \mathcal{X} \times \mathcal{Y}$  by the loss function

$$\ell_z(W) = \max_{m \in \{1, \dots, M\}} \mathbf{1}_{m \neq y} + \langle W(:, m), x \rangle - \langle W(:, y), x \rangle, \quad (170)$$

where, for any  $m \in \{1, \dots, M\}$ ,  $W(:, m)$  denotes the  $m$ -th column of  $W$  and

$$\mathbf{1}_{m \neq y} = \begin{cases} 1 & \text{if } m \neq y \\ 0 & \text{if } m = y. \end{cases} \quad (171)$$

Introducing the class-index

$$\hat{m} = \operatorname{argmax}_{m \in \{1, \dots, M\}} \mathbf{1}_{m \neq y} + \langle W(:, m), x \rangle - \langle W(:, y), x \rangle, \quad (172)$$

we compute a subgradient  $S' \in \partial \ell_z(W) \subseteq \mathbb{R}^{d \times M}$  as the matrix with  $m$ -th column given by

$$S'(:, m) = \begin{cases} x & \text{if } m = \hat{m} \\ -x & \text{if } m = y \\ 0 & \text{otherwise.} \end{cases} \quad (173)$$

As described in the main body, in the Mini-Wiki dataset experiment, we considered the setting outlined in Ex. 2 with the multi-class hinge loss above. In such a case, our OWO Meta-Learning method is reported in Alg. 9 – Alg. 10 and it coincides with a matrix-variant of Alg. 7 – Alg. 8.
